# Supplementary material
Source: PubMed Central journal article supplement (PMC6867166)

**Note to readers with disabilities:** *EHP* strives to ensure that all journal content is accessible to all readers. However, some figures and Supplemental Material published in *EHP* articles may not conform to [508 standards](#) due to the complexity of the information being presented. If you need assistance accessing journal content, please contact [ehp508@niehs.nih.gov](mailto:ehp508@niehs.nih.gov). Our staff will work with you to assess and meet your accessibility needs within 3 working days.

### **Supplemental Material**

#### **Prenatal Exposure to Phthalates and Neurodevelopment in the CHAMACOS Cohort**

Carly Hyland, Ana M. Mora, Katherine Kogut, Antonia M. Calafat, Kim Harley, Julianna Deardorff, Nina Holland, Brenda Eskenazi, and Sharon K. Sagiv

#### **Table of Contents**

**Table S1.** Sociodemographic characteristics [ $n$  (%) or median (P25-P75)] of live-born singletons from the initial CHAMACOS mother-child cohort ( $n = 527$ ) and study participants with prenatal urinary phthalate metabolites who completed at least one of the neurobehavioral assessments at ages 7-16 years ( $n = 334$ ).

**Table S2.** Mean executive function, social cognition, behavior, and cognition T scores by age point, based on teacher report, maternal report, and child assessment.

**Table S3.** Distribution of phthalate biomarker concentrations (uncorrected) measured in maternal urine samples collected at two time points during pregnancy, CHAMACOS ( $n = 327$ ).

**Table S4.** Spearman correlation coefficients for prenatal urinary phthalate biomarker concentrations (specific gravity-adjusted and averaged during pregnancy), CHAMACOS ( $n = 327$ ).

**Table S5.** Adjusted associations [ $\beta$  (95% CI)] of prenatal urinary phthalate biomarker concentrations (specific gravity-adjusted) categorized in tertiles with **WCST executive function outcomes at 9, and/or 12 years** using GEE models for all children and stratified by child sex, CHAMACOS.

**Table S6.** Adjusted associations [ $\beta$  (95% CI)] of prenatal urinary phthalate biomarker concentrations (specific gravity-adjusted) categorized in tertiles with **BRIEF (parent-reported) and NEPSY Tower executive function outcomes at 7, 9, and/or 12 years** using GEE models for all children and stratified by child sex, CHAMACOS.

**Table S7.** Adjusted associations [ $\beta$  (95% CI)] of prenatal urinary phthalate biomarker concentrations (specific gravity-adjusted) categorized in tertiles with **WISC-IV cognitive outcomes at 7 and/or 10.5 years** using GEE models for all children and stratified by child sex, CHAMACOS.

**Table S8.** Adjusted associations [ $\beta$  (95% CI)] of prenatal urinary phthalate biomarker concentrations (specific gravity-adjusted) categorized in tertiles **with social cognition outcomes at 7, 9, and 14 years** using linear regression models for all children and stratified by child sex, CHAMACOS.

**Table S9.** Adjusted associations [ $\beta$  (95% CI)] of prenatal urinary phthalate biomarker concentrations (specific gravity-adjusted) categorized in tertiles with **CADS behavioral outcomes at 7, 9, and/or 12 years** using GEE models for all children and stratified by child sex, CHAMACOS.

**Table S10.** Adjusted associations [ $\beta$  (95% CI)] of prenatal urinary phthalate biomarker concentrations (specific gravity-adjusted) categorized in tertiles with **BASC behavioral outcomes at 7 and/or 10.5 years** using GEE models for all children and stratified by child sex, CHAMACOS.

**Table S11.** Adjusted associations [ $\beta$  (95% CI)] of prenatal urinary phthalate biomarker concentrations (specific gravity-adjusted) categorized in tertiles with **CPT-II behavioral outcomes at 9 and/or 12 years** using GEE models for all children and stratified by child sex, CHAMACOS.

**Table S12.** Adjusted associations [ $\beta$  (95% CI)] of prenatal urinary phthalate biomarker concentrations (nmol/mL;  $\log_2$ -transformed and specific gravity-adjusted) with executive function and cognition outcomes at 7, 9, 10.5, 12, 14, and/or 16 years using GEE models stratified by sex, CHAMACOS.

**Table S13.** Adjusted associations [ $\beta$  (95% CI)] of individual prenatal urinary phthalate biomarker concentrations (ng/mL;  $\log_2$ -transformed and specific gravity-adjusted) with executive function and cognition outcomes at 7, 9, 10.5, 12, 14, and/or 16 years using GEE models, CHAMACOS.

**Table S14.** Adjusted associations [ $\beta$  (95% CI)] of prenatal urinary phthalate biomarker concentrations (nmol/mL;  $\log_2$ -transformed and specific gravity-adjusted) with social cognition and behavior outcomes at 7, 9, 10.5, 12, 14, and/or 16 years using GEE models stratified by sex, CHAMACOS.

**Table S15.** Adjusted associations [ $\beta$  (95% CI)] of prenatal urinary phthalate biomarker concentrations (nmol/mL;  $\log_2$ -transformed and specific gravity-adjusted) with self-reported BASC-2 behavior outcomes at 10.5, 14, and 16 years using linear regression models stratified by sex, CHAMACOS.

**Table S16.** Adjusted associations [ $\beta$  (95% CI)] of individual prenatal urinary phthalate biomarker concentrations (ng/mL; log<sub>2</sub>-transformed and specific gravity-adjusted) with social cognition and behavior outcomes at 7, 9, 10.5, 12, 14, and/or 16 years using GEE models, CHAMACOS.

**Table S17.** Adjusted associations [ $\beta$  (95% CI)] of individual prenatal urinary phthalate biomarker concentrations (ng/mL; log<sub>2</sub>-transformed and specific gravity-adjusted) with self-reported BASC-2 behavior outcomes at 10.5, 14, and 16 years using linear regression models, CHAMACOS.

**Table S18.** Adjusted associations [ $\beta$  (95% CI)] of prenatal urinary phthalate biomarker concentrations (nmol/mL; log<sub>2</sub>-transformed and specific gravity-adjusted) with executive function and cognition outcomes at 7, 9, 10.5, 12, 14, and/or 16 years **excluding preterm birth and low birthweight** using GEE models, CHAMACOS.

**Table S19.** Adjusted associations [ $\beta$  (95% CI)] of prenatal urinary phthalate biomarker concentrations (nmol/mL; log<sub>2</sub>-transformed and specific gravity-adjusted) with behavior and social cognition outcomes at 7, 9, 10.5, 12, 14 and/or 16 years **excluding preterm birth and low birthweight** using GEE models, CHAMACOS.

**Table S20.** Adjusted associations [ $\beta$  (95% CI)] of prenatal urinary phthalate biomarker concentrations (nmol/mL; log<sub>2</sub>-transformed and specific gravity-adjusted) with self-reported BASC-2 behavior outcomes at 10.5, 14, and 16 years **excluding preterm birth and low birthweight** using linear regression models, CHAMACOS.

**Table S21.** Adjusted associations [ $\beta$  (95% CI)] of prenatal urinary phthalate biomarker concentrations (nmol/mL; log<sub>2</sub>-transformed and specific gravity-adjusted) with executive function and cognition outcomes at 7, 9, 10.5, 12, 14, and/or 16 years **including maternal PPVT score** using GEE models, CHAMACOS.

**Table S22.** Adjusted associations [ $\beta$  (95% CI)] of prenatal urinary phthalate biomarker concentrations (nmol/mL; log<sub>2</sub>-transformed and specific gravity-adjusted) with behavior and social cognition outcomes at 7, 9, 10.5, 12, 14, and/or 16 years **including maternal PPVT score** using GEE models, CHAMACOS.

**Table S23.** Adjusted associations [ $\beta$  (95% CI)] of prenatal urinary phthalate biomarker concentrations (nmol/mL; log<sub>2</sub>-transformed and specific gravity-adjusted) with self-reported BASC-2 behavior outcomes at 10.5, 14, and 16 years **including maternal PPVT score** using linear regression models, CHAMACOS.

**Table S24.** Adjusted associations [ $\beta$  (95% CI)] of prenatal urinary phthalate biomarker concentrations (nmol/mL; log<sub>2</sub>-transformed and specific gravity-adjusted) with executive function and cognition outcomes at 7, 9, 10.5, 12, 14, and/or 16 years **including breastfeeding** using GEE models, CHAMACOS.

**Table S25.** Adjusted associations [ $\beta$  (95% CI)] of prenatal urinary phthalate biomarker concentrations (nmol/mL; log<sub>2</sub>-transformed and specific gravity-adjusted) with behavior and social cognition outcomes at 7, 9, 10.5, 12, 14, and/or 16 years **including breastfeeding** using GEE models, CHAMACOS.

**Table S26.** Adjusted associations [ $\beta$  (95% CI)] of prenatal urinary phthalate biomarker concentrations (nmol/mL; log<sub>2</sub>-transformed and specific gravity-adjusted) with self-reported BASC-2 behavior outcomes at 10.5, 14, and 16 years **including breastfeeding** using linear regression models, CHAMACOS.

**Table S27.** Adjusted associations [ $\beta$  (95% CI)] of prenatal urinary phthalate biomarker concentrations (nmol/mL; log<sub>2</sub>-transformed and specific gravity-adjusted) with executive function and cognition outcomes at 7, 9, 10.5, 12, 14, and/or 16 years **including prenatal PBDE exposure** using GEE models, CHAMACOS.

**Table S28.** Adjusted associations [ $\beta$  (95% CI)] of prenatal urinary phthalate biomarker concentrations (nmol/mL; log<sub>2</sub>-transformed and specific gravity-adjusted) with behavior and social cognition outcomes at 7, 9, 10.5, 12, 14, and/or 16 years **including prenatal PBDE exposures** using GEE models, CHAMACOS.

**Table S29.** Adjusted associations [ $\beta$  (95% CI)] of prenatal urinary phthalate biomarker concentrations (nmol/mL; log<sub>2</sub>-transformed and specific gravity-adjusted) with self-reported BASC-2 behavior outcomes at 10.5, 14, and 16 years **including prenatal PBDE exposures** using linear regression models, CHAMACOS.

**Table S30.** Adjusted associations [ $\beta$  (95% CI)] of prenatal urinary phthalate biomarker concentrations (nmol/mL; log<sub>2</sub>-transformed and specific gravity-adjusted) with executive function and cognition outcomes at 7, 9, 10.5, 12, 14, and/or 16 years **including prenatal OP pesticide exposure** using GEE models, CHAMACOS.

**Table S31.** Adjusted associations [ $\beta$  (95% CI)] of prenatal urinary phthalate biomarker concentrations (nmol/mL; log<sub>2</sub>-transformed and specific gravity-adjusted) with behavior and social cognition outcomes at 7, 9, 10.5, 12, 14, and/or 16 years **including prenatal OP pesticide exposures** using GEE models, CHAMACOS.

**Table S32.** Adjusted associations [ $\beta$  (95% CI)] of prenatal urinary phthalate biomarker concentrations (nmol/mL; log<sub>2</sub>-transformed and specific gravity-adjusted) with self-reported BASC-2 behavior outcomes at 10.5, 14, and 16 years **including prenatal OP pesticide exposures** using linear regression models, CHAMACOS.

**Table S33.** Adjusted associations [ $\beta$  (95% CI)] of prenatal urinary phthalate biomarker concentrations (nmol/mL; log<sub>2</sub>-transformed and specific gravity-adjusted) with executive function and cognition outcomes at 7, 9, 10.5, 12, 14, and/or 16 years **including prenatal OC pesticide exposure** using GEE models, CHAMACOS.

**Table S34.** Adjusted associations [ $\beta$  (95% CI)] of prenatal urinary phthalate biomarker concentrations (nmol/mL; log<sub>2</sub>-transformed and specific gravity-adjusted) with behavior and social cognition outcomes at 7, 9, 10.5, 12, 14, and/or 16 years **including prenatal OC pesticide exposures** using GEE models, CHAMACOS.

**Table S35.** Adjusted associations [ $\beta$  (95% CI)] of prenatal urinary phthalate biomarker concentrations (nmol/mL; log<sub>2</sub>-transformed and specific gravity-adjusted) with self-reported BASC-2 behavior outcomes at 10.5, 14, and 16 years **including prenatal OC exposures** using linear regression models, CHAMACOS.

**Table S36.** Adjusted associations [ $\beta$  (95% CI)] of prenatal urinary phthalate biomarker concentrations (nmol/mL; log<sub>2</sub>-transformed and specific gravity-adjusted) with executive function and cognition outcomes at 7, 9, 10.5, 12, 14, and/or 16 years **including prenatal Mn exposure** using GEE models, CHAMACOS.

**Table S37.** Adjusted associations [ $\beta$  (95% CI)] of prenatal urinary phthalate biomarker concentrations (nmol/mL; log<sub>2</sub>-transformed and specific gravity-adjusted) with behavior and social cognition outcomes at 7, 9, 10.5, 12, 14, and/or 16 years **including prenatal Mn exposures** using GEE models, CHAMACOS.

**Table S38.** Adjusted associations [ $\beta$  (95% CI)] of prenatal urinary phthalate biomarker concentrations (nmol/mL; log<sub>2</sub>-transformed and specific gravity-adjusted) with self-reported BASC-2 behavior outcomes at 10.5, 14, and 16 years **including prenatal Mn exposures** using linear regression models, CHAMACOS.

**Figure S1.** Directed Acyclic Graph (DAG) for prenatal exposure to phthalates and neurodevelopment in the CHAMACOS cohort. Generated using daggity.net.

**Table S1.** Sociodemographic characteristics [*n* (%) or median (P25-P75)] of live-born singletons from the initial CHAMACOS mother-child cohort (*n* = 527) and study participants with prenatal urinary phthalate metabolites who completed at least one of the neurobehavioral assessments at ages 7-16 years (*n* = 334)<sup>a</sup>.

| Characteristic                                               | 9y Assessment |             | 10.5Y Assessment |             | 12Y Assessment |              | 14Y Assessment |              | 16Y Assessment |             |
|--------------------------------------------------------------|---------------|-------------|------------------|-------------|----------------|--------------|----------------|--------------|----------------|-------------|
|                                                              | Non-Imputed   | Imputed     | Non-Imputed      | Imputed     | Non-Imputed    | Imputed      | Non-Imputed    | Imputed      | Non-Imputed    | Imputed     |
| <i>Maternal/<br/>household<br/>characteristics</i>           |               |             |                  |             |                |              |                |              |                |             |
| Age at enrollment (years)                                    | 26 (22-30)    | 26 (22-30)  | 26 (22-29)       | 26 (22-29)  | 25.5 (22-29)   | 25.5 (22-29) | 25.5 (22-29)   | 25.5 (22-29) | 25 (22-29)     | 25 (22-29)  |
| Education                                                    |               |             |                  |             |                |              |                |              |                |             |
| ≤ 6th grade                                                  | 140 (43.9)    | 140 (43.9)  | 132 (43.0)       | 132 (43.0)  | 139 (43.2)     | 139 (43.2)   | 136 (43.6)     | 136 (43.6)   | 133 (44.3)     | 133 (44.3)  |
| 7th-12th grade                                               | 112 (35.1)    | 112 (35.1)  | 110 (35.8)       | 110 (35.8)  | 114 (35.4)     | 114 (35.4)   | 111 (35.6)     | 111 (35.6)   | 106 (35.3)     | 106 (35.3)  |
| Completed high school                                        | 67 (21.0)     | 67 (21.0)   | 65 (21.2)        | 65 (21.2)   | 69 (21.4)      | 69 (21.4)    | 65 (20.8)      | 65 (20.8)    | 61 (20.3)      | 61 (20.3)   |
| (PPVT score) at 9-year visit <sup>b</sup>                    | 98 (80-108)   | 98 (80-108) | 98 (80-108)      | 98 (80-108) | 98 (80.5-108)  | 98 (80-108)  | 98 (80-108)    | 98 (80-108)  | 98 (80-108)    | 98 (80-108) |
| Country of birth                                             | 12            | 0           | 8                | 0           | 18             | 0            | 15             | 0            | 13             | 0           |
| Mexico                                                       | 275 (86.2)    | 275 (86.2)  | 264 (86.0)       | 264 (86.0)  | 277 (86.0)     | 277 (86.0)   | 270 (86.5)     | 270 (86.5)   | 261 (87.0)     | 261 (87.0)  |
| Other                                                        | 44 (13.8)     | 44 (13.8)   | 43 (14.0)        | 43 (14.0)   | 45 (14.0)      | 45 (14.0)    | 42 (13.5)      | 42 (13.5)    | 39 (13.0)      | 39 (13.0)   |
| Years in U.S.                                                |               |             |                  |             |                |              |                |              |                |             |
| ≤ 5                                                          | 148 (46.4)    | 148 (46.4)  | 144 (46.9)       | 144 (46.9)  | 152 (47.2)     | 152 (47.2)   | 146 (46.8)     | 146 (46.8)   | 142 (47.3)     | 142 (47.3)  |
| 6-10                                                         | 83 (26.0)     | 83 (26.0)   | 79 (25.7)        | 79 (25.7)   | 81 (25.2)      | 81 (25.2)    | 81 (26.0)      | 81 (26.0)    | 77 (25.7)      | 77 (25.7)   |
| ≥ 11                                                         | 88 (27.6)     | 88 (27.6)   | 84 (27.4)        | 84 (27.4)   | 89 (27.6)      | 89 (27.6)    | 85 (27.2)      | 85 (27.2)    | 81 (27.0)      | 81 (27.0)   |
| Maternal depression at visit (≥ 16 CES-D score) <sup>c</sup> |               |             |                  |             |                |              |                |              |                |             |
| No                                                           | 211 (67.4)    | 230         | 203 (66.1)       | 225 (73.3)  | 115 (66.8)     | 240 (74.5)   | 205 (65.7)     | 229 (73.4)   | 194 (64.7)     | 217 (72.3)  |
| Yes                                                          | 77 (24.6)     | 83          | 77 (25.1)        | 82 (26.7)   | 76 (23.6)      | 82 (25.5)    | 75 (24.0)      | 83 (26.6)    | 75 (25.0)      | 83 (27.7)   |
| Missing <sup>d</sup>                                         | 25 (8.0)      | 0 (0.0)     | 27 (8.8)         | 0 (0.0)     | 31 (9.6)       | 0 (0.0)      | 32 (10.3)      | 0 (0.0)      | 31 (10.3)      | 0 (0.0)     |



|                                             |                     |                     |                      |                      |                     |                     |                      |                      |                      |                      |
|---------------------------------------------|---------------------|---------------------|----------------------|----------------------|---------------------|---------------------|----------------------|----------------------|----------------------|----------------------|
| assessment                                  |                     |                     |                      |                      |                     |                     |                      |                      | (16.3-16.6)          | (16.3-16.6)          |
| Language of assessment                      |                     |                     |                      |                      |                     |                     |                      |                      |                      |                      |
| English                                     | 170 (54.3)          | 170 (54.3)          | 175 (65.5)           | 175 (65.5)           | 297 (95.2)          | 300 (96.2)          | -                    | -                    | -                    | -                    |
| Spanish                                     | 143 (45.7)          | 143 (45.7)          | 92 (34.5)            | 92 (34.5)            | 12 (3.9)            | 12 (3.8)            | -                    | -                    | -                    | -                    |
| Missing <sup>f</sup>                        | 0 (0.0)             | 0 (0.0)             | 0 (0.0)              | 0 (0.0)              | 3 (0.9)             | 0 (0.0)             | -                    | -                    | -                    | -                    |
| Number of hours played video games per week | 4.3 (0-7)           | 4 (0-7)             | -                    | -                    | 4.5 (0-7)           | 4.5 (0-7)           | -                    | -                    | -                    | -                    |
| Missing ( <i>n</i> ) <sup>h</sup>           | 1                   | 0                   | -                    | -                    | 3                   | 0                   | -                    | -                    | -                    | -                    |
| HOME Score at assessment                    | 0.1<br>(-0.6 – 0.8) | 0.1<br>(-0.6 – 0.8) | -0.1<br>(-0.6 – 0.6) | -0.1<br>(-0.6 – 0.6) | 0.0<br>(-0.6 – 0.6) | 0.2<br>(-0.6 – 0.6) | -0.2<br>(-0.6 – 0.6) | -0.1<br>(-0.6 – 0.6) | -0.2<br>(-0.6 – 0.6) | -0.1<br>(-0.6 – 0.6) |
| Missing ( <i>n</i> ) <sup>d</sup>           | 0                   | 0                   | 0                    | 0                    | 10                  | 0                   | 9                    | 0                    | 8                    | 0                    |

*Abbreviations:* CES-D, Center for Epidemiologic Studies Depression Scale; *n*, number of study participants; PPVT, Peabody Picture Vocabulary Test.

- = Not assessed at that time point and not adjusted for in models at that time point

<sup>a</sup> At age 9, 319 participants completed at least one neurodevelopmental test (n=319 mothers and 313 youth); at age 10.5, 307 participants completed at least one neurodevelopmental test (n=306 mothers and 307 youth); at age 12, 322 participants completed at least one neurodevelopmental test (n=318 mothers and 312 youth); at age 14, 312 participants completed at least one neurodevelopmental test (n=311 mothers and 306 youth); at age at 16, 300 participants completed at least one neurodevelopmental test (n=296 mothers and 286 youth).

<sup>b</sup> Imputed using data from earlier time points. For two participants included in sensitivity analyses who were missing PPVT score from earlier time points, data were imputed using random imputation.

<sup>c</sup> Assessed at 9-year visit

<sup>d</sup> Imputed using data from earlier time points when available. For 1 participant missing HOME score and maternal depression at age 9 who completed neurodevelopmental assessments at ages 14 and 16, data were imputed using random imputation.

<sup>e</sup> Assessed at 7, 9, and 10.5-year visits

<sup>f</sup> Imputed using data from earlier time points

<sup>g</sup> Assessed at 10.5-year visit

<sup>h</sup> Data not available from earlier time points. Imputed using random imputation.



| <b>Table S2.</b> Mean executive function, social cognition, behavior, and cognition T scores by age point, based on teacher report, maternal report, and child assessment. |                          |                    |                 |                    |                       |                     |                     |                     |
|----------------------------------------------------------------------------------------------------------------------------------------------------------------------------|--------------------------|--------------------|-----------------|--------------------|-----------------------|---------------------|---------------------|---------------------|
|                                                                                                                                                                            |                          | <b>Age 7 Years</b> |                 | <b>Age 9 Years</b> | <b>Age 10.5 Years</b> | <b>Age 12 Years</b> | <b>Age 14 Years</b> | <b>Age 16 Years</b> |
| Outcome                                                                                                                                                                    | Orientation <sup>a</sup> | Mean ± SD          | Mean ± SD       | Mean ± SD          | Mean ± SD             | Mean ± SD           | Mean ± SD           | Mean ± SD           |
| Maternal or Teacher Assessment                                                                                                                                             |                          | Teacher report     | Maternal report | Maternal report    | Maternal report       | Maternal report     | Maternal report     | Maternal report     |
| <i>Executive Function</i>                                                                                                                                                  |                          |                    |                 |                    |                       |                     |                     |                     |
| BRIEF <sup>b</sup>                                                                                                                                                         |                          |                    |                 |                    |                       |                     |                     |                     |
| Behavior Regulation Index                                                                                                                                                  | (+)                      |                    | 50.1 ± 10.7     | 50.6 ± 10.3        |                       | 50.9 ± 11.1         |                     |                     |
| Metacognition Index                                                                                                                                                        | (+)                      |                    | 50.3 ± 11.3     | 48.8 ± 10.0        |                       | 48.2 ± 9.3          |                     |                     |
| Global Executive Composite                                                                                                                                                 | (+)                      |                    | 50.5 ± 11.3     | 49.5 ± 10.1        |                       | 49.0 ± 10.1         |                     |                     |
| <i>Social Cognition</i>                                                                                                                                                    |                          |                    |                 |                    |                       |                     |                     |                     |
| SRS-2 <sup>b</sup>                                                                                                                                                         | (+)                      |                    |                 |                    |                       |                     | 55.6 ± 7.7          |                     |
| <i>Behavior</i>                                                                                                                                                            |                          |                    |                 |                    |                       |                     |                     |                     |
| BASC-2 <sup>b</sup>                                                                                                                                                        |                          |                    |                 |                    |                       |                     |                     |                     |
| Internalizing problems                                                                                                                                                     | (+)                      | 50.2 ± 11.6        | 48.8 ± 9.4      |                    | 48.5 ± 9.2            |                     | 49.4 ± 9.5          | 50.4 ± 10.0         |
| Depression scale                                                                                                                                                           | (+)                      | 49.6 ± 9.7         | 49.4 ± 9.0      |                    |                       |                     |                     |                     |
| Anxiety scale                                                                                                                                                              | (+)                      | 49.5 ± 11.5        | 51.6 ± 10.1     |                    |                       |                     |                     |                     |
| Externalizing problems                                                                                                                                                     | (+)                      | 49.5 ± 10.0        | 45.1 ± 9.3      |                    | 46.4 ± 8.3            |                     | 45.7 ± 7.2          | 45.6 ± 8.6          |
| Hyperactivity scale                                                                                                                                                        | (+)                      | 49.8 ± 10.2        | 45.7 ± 8.7      |                    | 46.7 ± 8.2            |                     | 45.7 ± 8.1          | 46.6 ± 9.3          |
| Attention problems scale                                                                                                                                                   | (+)                      | 51.4 ± 7.6         | 49.8 ± 10.5     |                    | 49.5 ± 10.6           |                     | 49.1 ± 9.6          | 49.9 ± 9.8          |
| CADS <sup>b</sup>                                                                                                                                                          |                          |                    |                 |                    |                       |                     |                     |                     |
| ADHD Index                                                                                                                                                                 | (+)                      | 53.7 ± 11.5        | 49.9 ± 8.0      | 51.4 ± 9.3         |                       | 49.5 ± 8.2          |                     |                     |
| DSM-IV total scale                                                                                                                                                         | (+)                      | 52.3 ± 9.8         | 50.3 ± 8.4      | 52.0 ± 9.8         |                       | 49.6 ± 8.3          |                     |                     |
| Inattentive subscale                                                                                                                                                       | (+)                      | 48.8 ± 8.7         | 48.9 ± 7.8      | 50.1 ± 8.8         |                       | 48.0 ± 7.2          |                     |                     |
| Hyperactive/Impulsive subsale                                                                                                                                              | (+)                      | 52.5 ± 10.4        | 51.9 ± 8.6      | 53.7 ± 10.8        |                       | 51.9 ± 9.1          |                     |                     |
| Child Assessment                                                                                                                                                           |                          |                    |                 |                    |                       |                     |                     |                     |
| <i>Executive Function</i>                                                                                                                                                  |                          |                    |                 |                    |                       |                     |                     |                     |
| WCST <sup>b</sup>                                                                                                                                                          |                          |                    |                 |                    |                       |                     |                     |                     |

|                                          |     |  |              |             |             |             |             |             |
|------------------------------------------|-----|--|--------------|-------------|-------------|-------------|-------------|-------------|
| Errors                                   | (-) |  |              | 48.5 ± 10.6 |             | 52.9 ± 11.3 |             |             |
| Perseverative errors                     | (-) |  |              | 51.9 ± 14.2 |             | 56.3 ± 13.7 |             |             |
| NEPSY-Tower <sup>b</sup>                 | (-) |  |              | 9.6 ± 2.7   |             |             |             |             |
| <i>Cognition</i>                         |     |  |              |             |             |             |             |             |
| WISC-IV <sup>b</sup>                     |     |  |              |             |             |             |             |             |
| FSIQ                                     | (-) |  | 104.0 ± 14.4 |             | 90.1 ± 11.0 |             |             |             |
| VCIQ                                     | (-) |  | 106.6 ± 16.9 |             | 84.4 ± 11.6 |             |             |             |
| PRIQ                                     | (-) |  | 102.7 ± 16.2 |             | 93.0 ± 14.9 |             |             |             |
| WMIQ                                     | (-) |  | 93.6 ± 13.8  |             | 96.5 ± 11.3 |             |             |             |
| PSIQ                                     | (-) |  | 108.8 ± 13.2 |             | 98.1 ± 12.5 |             |             |             |
| <i>Social Cognition</i>                  |     |  |              |             |             |             |             |             |
| ENI <sup>c</sup>                         | (-) |  |              | 6.6 ± 1.2   |             |             |             |             |
| NEPSY-II Affect Recognition <sup>c</sup> | (-) |  |              |             |             | 26.6 ± 3.6  |             |             |
| <i>Behavior</i>                          |     |  |              |             |             |             |             |             |
| BASC-2 <sup>b</sup>                      |     |  |              |             |             |             |             |             |
| Internalizing problems                   | (+) |  |              |             |             |             |             | 49.3 ± 10.4 |
| Depression scale                         | (+) |  |              |             | 50.5 ± 9.5  |             | 48.5 ± 9.9  | 48.2 ± 10.0 |
| Anxiety scale                            | (+) |  |              |             | 51.0 ± 8.4  |             | 49.4 ± 10.2 | 50.9 ± 1.4  |
| Externalizing problems                   | (+) |  |              |             |             |             |             |             |
| Hyperactivity scale                      | (+) |  |              |             | 46.6 ± 9.5  |             |             | 47.8 ± 9.8  |
| Attention problems scale                 | (+) |  |              |             | 51.0 ± 9.2  |             |             | 49.3 ± 10.0 |
| CPT-II <sup>b</sup>                      |     |  |              |             |             |             |             |             |
| Errors of omission                       | (+) |  |              | 59.6 ± 18.1 |             | 49.1 ± 10.1 |             |             |
| Errors of commission                     | (+) |  |              | 49.6 ± 9.7  |             | 40.0 ± 11.1 |             |             |
| ADHD Confidence Index <sup>d</sup>       | (+) |  |              | 54.4 ± 22.4 |             | 46.9 ± 17.7 |             |             |

*Abbreviations:* BRIEF, Behavior Rating Inventory Executive Function; SRS, Social Responsiveness Scale, Version 2; ENI, Evaluación Neuropsicológica del Niño; BASC-2, Behavior Assessment System for Children, 2nd edition; CADS, Conners' ADHD/DSM-IV Scales; ADHD, Attention Deficit Hyperactivity Disorder; DSM-IV, Diagnostic and Statistical Manual of Mental Disorders, 4th Edition; WCST, Wisconsin Card Sort Task-64: Computer Version 2 – Research Edition; WISC-IV, Wechsler Intelligence Scale for Children 4th edition; VCIQ, verbal comprehension IQ; PRIQ, perceptual reasoning IQ; WMIQ, working memory IQ; PSIQ, processing speed IQ; ENI, Evaluación Neuropsicológica del Niño; NEPSY, a Developmental Neuropsychological Assessment; CPT-II, Continuous Performance Test, 2<sup>nd</sup> edition.

<sup>a</sup> (+) Higher scores indicate poorer performance/more symptomatic behavior; (-) Lower scores indicate poorer performance/more symptomatic behavior.

<sup>b</sup> BRIEF, SRS-2, BASC-2, CADS, WCST, SRS-2, and CPT T-scores are standardized to mean  $\pm$  SD = 50  $\pm$  10; WISC-IV scores are standardized to mean  $\pm$  SD = 100  $\pm$  15; NEPSY Tower scores are standardized to a mean  $\pm$  SD = 10  $\pm$  3.

<sup>c</sup> ENI and NEPSY-II Affect Recognition are raw scores.

<sup>d</sup> The CPT ADHD Confidence Index is not a T-score but is rather produced by discriminant function analysis and represents the percentage of children with this performance profile who would be correctly classified as having ADHD.

**Table S3.** Distribution of phthalate biomarker concentrations (uncorrected) measured in maternal urine samples collected at two time points during pregnancy, CHAMACOS ( $n = 327$ ).

| Phthalate biomarker <sup>a</sup> | Average of two measurements |      |      |       |       |         |
|----------------------------------|-----------------------------|------|------|-------|-------|---------|
|                                  | GM (GSD)                    | Min  | P25  | P50   | P75   | Max     |
| ΣLMW                             | 1.2 (3.1)                   | 0.1  | 0.6  | 1.1   | 2.4   | 95.0    |
| MEP                              | 189.2 (2.4)                 | 9.8  | 83.6 | 180.0 | 425.7 | 18390.0 |
| MBP                              | 22.7 (2.6)                  | 0.9  | 12.5 | 21.3  | 43.1  | 418.9   |
| MiBP                             | 2.8 (2.9)                   | 0.1  | 1.5  | 2.8   | 5.4   | 103.5   |
| ΣHMW                             | 0.3 (2.3)                   | 0.03 | 0.15 | 0.3   | 0.4   | 4.2     |
| MBzP                             | 7.2 (2.8)                   | 0.3  | 3.8  | 7.3   | 13.8  | 115.2   |
| M CPP                            | 1.7 (2.5)                   | 0.0  | 1.0  | 2.0   | 3.1   | 29.7    |
| MCOP                             | 3.0 (2.3)                   | 0.1  | 1.8  | 3.1   | 5.1   | 77.7    |
| MCNP                             | 1.8 (2.2)                   | 0.1  | 1.2  | 1.9   | 3.1   | 20.5    |
| ΣDEHP                            | 0.2 (2.4)                   | 0.0  | 0.1  | 0.2   | 0.3   | 4.2     |
| MEHP                             | 4.5 (2.5)                   | 0.1  | 2.0  | 3.7   | 7.0   | 128.9   |
| MEHHP                            | 15.2 (2.6)                  | 0.5  | 8.6  | 15.0  | 27.4  | 401.2   |
| MECPP                            | 25.9 (2.3)                  | 2.6  | 15.6 | 24.9  | 42.3  | 526.5   |
| MEOHP                            | 11.2 (2.6)                  | 0.4  | 6.4  | 11.1  | 20.3  | 279.2   |

*Abbreviations:* MEP, monoethyl phthalate; MBP, mono-n-butyl phthalate; MiBP, mono-isobutyl phthalate; MBzP, monobenzyl phthalate; M CPP, mono(3-carboxypropyl) phthalate; MCOP, mono(carboxyoctyl) phthalate; MCNP, mono(carboxynonyl) phthalate; ΣDEHP, sum of di-2-ethylhexyl phthalate metabolites; MEHP, mono-2-ethylhexyl phthalate; MEHHP, mono(2-ethyl-5-hydroxyhexyl) phthalate; MEOHP, mono(2-ethyl-5-oxohexyl) phthalate; MECPP, mono(2-ethyl-5-carboxypentyl) phthalate; ΣHMW, sum of high-molecular weight phthalate metabolites; ΣLMW, sum of low-molecular weight phthalate metabolites.

<sup>a</sup> Units are ng/mL for all individual metabolites and nmol/mL for the sums of metabolites (ΣDEHP, ΣHMW, ΣLMW).

**Table S4.** Spearman correlation coefficients for prenatal urinary phthalate biomarker concentrations (specific gravity-adjusted and averaged during pregnancy), CHAMACOS ( $n = 327$ ).

| Phthalate biomarker <sup>a</sup> | $\Sigma$ LMW | MEP  | MBP  | MiBP | $\Sigma$ HMW | MBzP | MCPP | MCOP | MCNP | $\Sigma$ DEHP | MEHP | MEHHP | MECPP | MEOHP |
|----------------------------------|--------------|------|------|------|--------------|------|------|------|------|---------------|------|-------|-------|-------|
| $\Sigma$ LMW                     | 1.00         |      |      |      |              |      |      |      |      |               |      |       |       |       |
| MEP                              | 0.98         | 1.00 |      |      |              |      |      |      |      |               |      |       |       |       |
| MBP                              | 0.36         | 0.24 | 1.00 |      |              |      |      |      |      |               |      |       |       |       |
| MiBP                             | 0.25         | 0.18 | 0.56 | 1.00 |              |      |      |      |      |               |      |       |       |       |
| $\Sigma$ HMW                     | 0.25         | 0.19 | 0.55 | 0.49 | 1.00         |      |      |      |      |               |      |       |       |       |
| MBzP                             | 0.26         | 0.21 | 0.51 | 0.52 | 0.64         | 1.00 |      |      |      |               |      |       |       |       |
| MCPP                             | 0.26         | 0.18 | 0.55 | 0.42 | 0.59         | 0.54 | 1.00 |      |      |               |      |       |       |       |
| MCOP                             | 0.20         | 0.15 | 0.45 | 0.41 | 0.64         | 0.62 | 0.65 | 1.00 |      |               |      |       |       |       |
| MCNP                             | 0.15         | 0.11 | 0.35 | 0.30 | 0.49         | 0.48 | 0.57 | 0.70 | 1.00 |               |      |       |       |       |
| $\Sigma$ DEHP                    | 0.23         | 0.17 | 0.50 | 0.45 | 0.96         | 0.50 | 0.50 | 0.53 | 0.40 | 1.00          |      |       |       |       |
| MEHP                             | 0.21         | 0.16 | 0.46 | 0.43 | 0.80         | 0.44 | 0.42 | 0.45 | 0.35 | 0.82          | 1.00 |       |       |       |
| MEHHP                            | 0.22         | 0.16 | 0.53 | 0.47 | 0.94         | 0.51 | 0.49 | 0.51 | 0.37 | 0.98          | 0.81 | 1.00  |       |       |
| MECPP                            | 0.22         | 0.16 | 0.44 | 0.39 | 0.93         | 0.46 | 0.47 | 0.51 | 0.40 | 0.97          | 0.73 | 0.90  | 1.00  |       |
| MEOHP                            | 0.24         | 0.17 | 0.55 | 0.48 | 0.95         | 0.53 | 0.52 | 0.54 | 0.40 | 0.98          | 0.81 | 0.98  | 0.92  | 1.00  |

*Abbreviations:* MEP, monoethyl phthalate; MBP, mono-n-butyl phthalate; MiBP, mono-isobutyl phthalate; MBzP, monobenzyl phthalate; MCPP, mono(3-carboxypropyl) phthalate; MCOP, mono(carboxyoctyl) phthalate; MCNP, mono(carboxynonyl) phthalate;  $\Sigma$ DEHP, sum of di(2-ethylhexyl) phthalate metabolites; MEHP, mono(2-ethylhexyl) phthalate; MEHHP, mono(2-ethyl-5-hydroxyhexyl) phthalate; MEOHP, mono(2-ethyl-5-oxohexyl) phthalate; MECPP, mono-(2-ethyl-5-carboxypentyl) phthalate;  $\Sigma$ HMW, sum of metabolites of high-molecular weight phthalates;  $\Sigma$ LMW, sum of metabolites of low-molecular weight phthalates.

<sup>a</sup> Units are ng/mL for all individual metabolites and nmol/mL for the sums of metabolites ( $\Sigma$ DEHP,  $\Sigma$ HMW,  $\Sigma$ LMW).

**Table S5.** Adjusted associations [ $\beta$  (95% CI)] of prenatal urinary phthalate biomarker concentrations (specific gravity-adjusted)<sup>a,b</sup> categorized in tertiles with **WCST executive function outcomes<sup>c</sup> at 9, and/or 12 years** using GEE models for all children and stratified by child sex, CHAMACOS.

|                                                                                                                                                                                                                                                                                                                                                                                                                                                                                                                                                                                                                                                                                                                                                                                                                                                                                                                                                                                                                                                                                                                                                                                                                                                                                                                                                                                                                                                                                                                                                                                                                                                                                      | All children <sup>d</sup> | Boys <sup>e</sup> | Girls <sup>f</sup> | p-int |
|--------------------------------------------------------------------------------------------------------------------------------------------------------------------------------------------------------------------------------------------------------------------------------------------------------------------------------------------------------------------------------------------------------------------------------------------------------------------------------------------------------------------------------------------------------------------------------------------------------------------------------------------------------------------------------------------------------------------------------------------------------------------------------------------------------------------------------------------------------------------------------------------------------------------------------------------------------------------------------------------------------------------------------------------------------------------------------------------------------------------------------------------------------------------------------------------------------------------------------------------------------------------------------------------------------------------------------------------------------------------------------------------------------------------------------------------------------------------------------------------------------------------------------------------------------------------------------------------------------------------------------------------------------------------------------------|---------------------------|-------------------|--------------------|-------|
| <b>Errors</b>                                                                                                                                                                                                                                                                                                                                                                                                                                                                                                                                                                                                                                                                                                                                                                                                                                                                                                                                                                                                                                                                                                                                                                                                                                                                                                                                                                                                                                                                                                                                                                                                                                                                        |                           |                   |                    |       |
| $\Sigma$ LMW                                                                                                                                                                                                                                                                                                                                                                                                                                                                                                                                                                                                                                                                                                                                                                                                                                                                                                                                                                                                                                                                                                                                                                                                                                                                                                                                                                                                                                                                                                                                                                                                                                                                         |                           |                   |                    |       |
| T1                                                                                                                                                                                                                                                                                                                                                                                                                                                                                                                                                                                                                                                                                                                                                                                                                                                                                                                                                                                                                                                                                                                                                                                                                                                                                                                                                                                                                                                                                                                                                                                                                                                                                   | Reference                 | Reference         | Reference          | 0.33  |
| T2                                                                                                                                                                                                                                                                                                                                                                                                                                                                                                                                                                                                                                                                                                                                                                                                                                                                                                                                                                                                                                                                                                                                                                                                                                                                                                                                                                                                                                                                                                                                                                                                                                                                                   | -2.1 (-4.3, 0.1)          | -1.4 (-4.5, 1.7)  | -2.9 (-6.1, 0.4)   |       |
| T3                                                                                                                                                                                                                                                                                                                                                                                                                                                                                                                                                                                                                                                                                                                                                                                                                                                                                                                                                                                                                                                                                                                                                                                                                                                                                                                                                                                                                                                                                                                                                                                                                                                                                   | 0.8 (-1.3, 2.9)           | 1.1 (-1.9, 4.1)   | -0.4 (-3.5, 2.7)   |       |
| $\Sigma$ HMW                                                                                                                                                                                                                                                                                                                                                                                                                                                                                                                                                                                                                                                                                                                                                                                                                                                                                                                                                                                                                                                                                                                                                                                                                                                                                                                                                                                                                                                                                                                                                                                                                                                                         |                           |                   |                    |       |
| T1                                                                                                                                                                                                                                                                                                                                                                                                                                                                                                                                                                                                                                                                                                                                                                                                                                                                                                                                                                                                                                                                                                                                                                                                                                                                                                                                                                                                                                                                                                                                                                                                                                                                                   | Reference                 | Reference         | Reference          | 0.97  |
| T2                                                                                                                                                                                                                                                                                                                                                                                                                                                                                                                                                                                                                                                                                                                                                                                                                                                                                                                                                                                                                                                                                                                                                                                                                                                                                                                                                                                                                                                                                                                                                                                                                                                                                   | 0.4 (-1.8, 2.5)           | 0.2 (-2.9, 3.3)   | 0.4 (-2.8, 3.6)    |       |
| T3                                                                                                                                                                                                                                                                                                                                                                                                                                                                                                                                                                                                                                                                                                                                                                                                                                                                                                                                                                                                                                                                                                                                                                                                                                                                                                                                                                                                                                                                                                                                                                                                                                                                                   | 0.9 (-1.3, 3.1)           | -0.2 (-3.5, 3.2)  | 1.3 (-1.9, 4.4)    |       |
| $\Sigma$ DEHP                                                                                                                                                                                                                                                                                                                                                                                                                                                                                                                                                                                                                                                                                                                                                                                                                                                                                                                                                                                                                                                                                                                                                                                                                                                                                                                                                                                                                                                                                                                                                                                                                                                                        |                           |                   |                    |       |
| T1                                                                                                                                                                                                                                                                                                                                                                                                                                                                                                                                                                                                                                                                                                                                                                                                                                                                                                                                                                                                                                                                                                                                                                                                                                                                                                                                                                                                                                                                                                                                                                                                                                                                                   | Reference                 | Reference         | Reference          | 0.77  |
| T2                                                                                                                                                                                                                                                                                                                                                                                                                                                                                                                                                                                                                                                                                                                                                                                                                                                                                                                                                                                                                                                                                                                                                                                                                                                                                                                                                                                                                                                                                                                                                                                                                                                                                   | 0.0 (-2.2, 2.2)           | -0.6 (-3.6, 2.5)  | 0.4 (-2.8, 3.6)    |       |
| T3                                                                                                                                                                                                                                                                                                                                                                                                                                                                                                                                                                                                                                                                                                                                                                                                                                                                                                                                                                                                                                                                                                                                                                                                                                                                                                                                                                                                                                                                                                                                                                                                                                                                                   | 1.0 (-1.2, 3.2)           | 0.1 (-3.2, 3.3)   | 1.4 (-1.8, 4.7)    |       |
| <b>Preservative errors</b>                                                                                                                                                                                                                                                                                                                                                                                                                                                                                                                                                                                                                                                                                                                                                                                                                                                                                                                                                                                                                                                                                                                                                                                                                                                                                                                                                                                                                                                                                                                                                                                                                                                           |                           |                   |                    |       |
| $\Sigma$ LMW                                                                                                                                                                                                                                                                                                                                                                                                                                                                                                                                                                                                                                                                                                                                                                                                                                                                                                                                                                                                                                                                                                                                                                                                                                                                                                                                                                                                                                                                                                                                                                                                                                                                         |                           |                   |                    |       |
| T1                                                                                                                                                                                                                                                                                                                                                                                                                                                                                                                                                                                                                                                                                                                                                                                                                                                                                                                                                                                                                                                                                                                                                                                                                                                                                                                                                                                                                                                                                                                                                                                                                                                                                   | Reference                 | Reference         | Reference          | 0.12  |
| T2                                                                                                                                                                                                                                                                                                                                                                                                                                                                                                                                                                                                                                                                                                                                                                                                                                                                                                                                                                                                                                                                                                                                                                                                                                                                                                                                                                                                                                                                                                                                                                                                                                                                                   | -2.4 (-5.2, 0.4)          | -0.7 (-5.0, 3.6)  | -3.6 (-7.4, 0.2)   |       |
| T3                                                                                                                                                                                                                                                                                                                                                                                                                                                                                                                                                                                                                                                                                                                                                                                                                                                                                                                                                                                                                                                                                                                                                                                                                                                                                                                                                                                                                                                                                                                                                                                                                                                                                   | 1.9 (-0.7, 4.5)           | 3.1 (-0.7, 7.0)   | 0.0 (-3.7, 3.6)    |       |
| $\Sigma$ HMW                                                                                                                                                                                                                                                                                                                                                                                                                                                                                                                                                                                                                                                                                                                                                                                                                                                                                                                                                                                                                                                                                                                                                                                                                                                                                                                                                                                                                                                                                                                                                                                                                                                                         |                           |                   |                    |       |
| T1                                                                                                                                                                                                                                                                                                                                                                                                                                                                                                                                                                                                                                                                                                                                                                                                                                                                                                                                                                                                                                                                                                                                                                                                                                                                                                                                                                                                                                                                                                                                                                                                                                                                                   | Reference                 | Reference         | Reference          | 0.93  |
| T2                                                                                                                                                                                                                                                                                                                                                                                                                                                                                                                                                                                                                                                                                                                                                                                                                                                                                                                                                                                                                                                                                                                                                                                                                                                                                                                                                                                                                                                                                                                                                                                                                                                                                   | 1.5 (-1.3, 4.3)           | 2.9 (-1.3, 7.1)   | 0.7 (-3.2, 4.5)    |       |
| T3                                                                                                                                                                                                                                                                                                                                                                                                                                                                                                                                                                                                                                                                                                                                                                                                                                                                                                                                                                                                                                                                                                                                                                                                                                                                                                                                                                                                                                                                                                                                                                                                                                                                                   | 1.8 (-1.1, 4.7)           | 1.7 (-3.0, 6.5)   | 2.1 (-1.8, 6.0)    |       |
| $\Sigma$ DEHP                                                                                                                                                                                                                                                                                                                                                                                                                                                                                                                                                                                                                                                                                                                                                                                                                                                                                                                                                                                                                                                                                                                                                                                                                                                                                                                                                                                                                                                                                                                                                                                                                                                                        |                           |                   |                    |       |
| T1                                                                                                                                                                                                                                                                                                                                                                                                                                                                                                                                                                                                                                                                                                                                                                                                                                                                                                                                                                                                                                                                                                                                                                                                                                                                                                                                                                                                                                                                                                                                                                                                                                                                                   | Reference                 | Reference         | Reference          | 0.92  |
| T2                                                                                                                                                                                                                                                                                                                                                                                                                                                                                                                                                                                                                                                                                                                                                                                                                                                                                                                                                                                                                                                                                                                                                                                                                                                                                                                                                                                                                                                                                                                                                                                                                                                                                   | -0.1 (-3.0, 2.7)          | 1.3 (-2.9, 5.6)   | -0.7 (-4.6, 3.2)   |       |
| T3                                                                                                                                                                                                                                                                                                                                                                                                                                                                                                                                                                                                                                                                                                                                                                                                                                                                                                                                                                                                                                                                                                                                                                                                                                                                                                                                                                                                                                                                                                                                                                                                                                                                                   | 1.3 (-1.5, 4.1)           | 1.1 (-3.7, 5.8)   | 1.7 (-2.2, 5.5)    |       |
| <p><i>Abbreviations:</i> T1, Tertile 1; T2, Tertile 2; T3, Tertile 3; WCST, Wisconsin Card Sort Task-64: Computer Version 2 – Research Edition; MEP, monoethyl phthalate; MBP, mono-n-butyl phthalate; MiBP, mono-isobutyl phthalate; MBzP, monobenzyl phthalate; MCP, mono-(3-carboxypropyl) phthalate; MCOP, mono(carboxyoctyl) phthalate; MCNP, mono(carboxynonyl) phthalate; <math>\Sigma</math>DEHP, sum of di-2-ethylhexyl phthalate metabolites; MEHP, mono(2-ethylhexyl) phthalate; MEHHP, mono(2-ethyl-5-hydroxyhexyl) phthalate; MEOHP, mono(2-ethyl-5-oxohexyl) phthalate; MECCP, mono(2-ethyl-5-carboxypentyl) phthalate; <math>\Sigma</math>HMW, sum of metabolites of high-molecular weight phthalates; <math>\Sigma</math>LMW, sum of metabolites of low-molecular weight phthalates.</p> <p>Models were adjusted for maternal age at enrollment, education, country of birth, years in the U.S., depression at time of assessment; child sex, child age at time of assessment, language of assessment, HOME score, and household income at time of assessment.</p> <p><sup>a</sup>Separate models created for each phthalate metabolite or sum of metabolites (<math>\Sigma</math>DEHP, <math>\Sigma</math>HMW, <math>\Sigma</math>LMW).</p> <p><sup>b</sup>Units are ng/mL for all individual metabolites and nmol/mL for the sums of metabolites (<math>\Sigma</math>DEHP, <math>\Sigma</math>HMW, <math>\Sigma</math>LMW).</p> <p><sup>c</sup>Higher scores indicate more symptomatic behavior.</p> <p><sup>d</sup>Number of children with data = 318.</p> <p><sup>e</sup>Number of boys with data = 152.</p> <p><sup>f</sup>Number of girls with data = 166.</p> |                           |                   |                    |       |

**Table S6.** Adjusted associations [ $\beta$  (95% CI)] of prenatal urinary phthalate biomarker concentrations (specific gravity-adjusted)<sup>a,b</sup> categorized in tertiles with **BRIEF (parent-reported) and NEPSY Tower executive function outcomes<sup>c</sup> at 7, 9, and/or 12 years** using GEE models for all children and stratified by child sex, CHAMACOS.

|                                          | All children <sup>d</sup> | Boys <sup>e</sup> | Girls <sup>f</sup> | p-int |
|------------------------------------------|---------------------------|-------------------|--------------------|-------|
| <b><i>Behavioral regulation</i></b>      |                           |                   |                    |       |
| $\Sigma$ LMW                             |                           |                   |                    |       |
| T1                                       | Reference                 | Reference         | Reference          | 0.08  |
| T2                                       | 0.2 (-1.4, 1.9)           | 1.6 (-1.2, 4.4)   | -0.9 (-2.9, 1.1)   |       |
| T3                                       | 0.2 (-1.4, 1.9)           | 1.5 (-1.0, 4.0)   | -1.0 (-3.2, 1.2)   |       |
| $\Sigma$ HMW                             |                           |                   |                    |       |
| T1                                       | Reference                 | Reference         | Reference          | 0.10  |
| T2                                       | -0.2 (-1.8, 1.4)          | 1.0 (-1.5, 3.5)   | -1.2 (-3.3, 0.8)   |       |
| T3                                       | 0.2 (-1.5, 1.9)           | 1.5 (-1.2, 4.2)   | -0.9 (-3.1, 1.2)   |       |
| $\Sigma$ DEHP                            |                           |                   |                    |       |
| T1                                       | Reference                 | Reference         | Reference          | 0.20  |
| T2                                       | 1.1 (-0.5, 2.7)           | 1.2 (-1.3, 3.8)   | 1.0 (-1.1, 3.0)    |       |
| T3                                       | -0.4 (-2.1, 1.2)          | 0.0 (-2.7, 2.7)   | -0.7 (-2.8, 1.4)   |       |
| <b><i>Metacognition</i></b>              |                           |                   |                    |       |
| $\Sigma$ LMW                             |                           |                   |                    |       |
| T1                                       | Reference                 | Reference         | Reference          | 0.49  |
| T2                                       | -0.1 (-1.7, 1.6)          | 0.5 (-2.0, 3.0)   | -0.7 (-2.8, 1.5)   |       |
| T3                                       | -1.2 (-2.8, 0.4)          | 0.0 (-2.1, 2.2)   | -2.5 (-4.8, -0.2)  |       |
| $\Sigma$ HMW                             |                           |                   |                    |       |
| T1                                       | Reference                 | Reference         | Reference          | 0.64  |
| T2                                       | 0.4 (-1.2, 1.9)           | 0.2 (-2.0, 2.4)   | 0.5 (-1.7, 2.6)    |       |
| T3                                       | -0.9 (-2.5, 0.8)          | 0.2 (-2.2, 2.6)   | -1.9 (-4.2, 0.5)   |       |
| $\Sigma$ DEHP                            |                           |                   |                    |       |
| T1                                       | Reference                 | Reference         | Reference          | 0.87  |
| T2                                       | 1.4 (-0.2, 2.9)           | 0.3 (-2.0, 2.6)   | 2.3 (0.2, 4.5)     |       |
| T3                                       | -1.0 (-2.6, 0.6)          | -0.6 (-2.9, 1.7)  | -1.4 (-3.6, 0.9)   |       |
| <b><i>Global executive composite</i></b> |                           |                   |                    |       |
| $\Sigma$ LMW                             |                           |                   |                    |       |
| T1                                       | Reference                 | Reference         | Reference          | 0.35  |
| T2                                       | 0.1 (-1.6, 1.7)           | 1.1 (-1.6, 3.7)   | -0.8 (-2.9, 1.3)   |       |
| T3                                       | -0.7 (-2.3, 0.9)          | 0.7 (-1.7, 3.0)   | -2.1 (-4.3, 0.2)   |       |
| $\Sigma$ HMW                             |                           |                   |                    |       |
| T1                                       | Reference                 | Reference         | Reference          | 0.44  |
| T2                                       | 0.2 (-1.4, 1.7)           | 0.6 (-1.8, 2.9)   | -0.3 (-2.4, 1.9)   |       |
| T3                                       | -0.5 (-2.2, 1.2)          | 0.8 (-1.8, 3.4)   | -1.6 (-3.9, 0.7)   |       |
| $\Sigma$ DEHP                            |                           |                   |                    |       |
| T1                                       | Reference                 | Reference         | Reference          | 0.67  |
| T2                                       | 1.3 (-0.3, 2.9)           | 0.8 (-1.7, 3.2)   | 1.8 (-0.3, 4.0)    |       |
| T3                                       | -0.9 (-2.5, 0.8)          | -0.4 (-2.9, 2.1)  | -1.3 (-3.5, 1.0)   |       |
| <b><i>NEPSY Tower</i></b>                |                           |                   |                    |       |
| $\Sigma$ LMW                             |                           |                   |                    |       |

|       |                  |                  |                 |      |
|-------|------------------|------------------|-----------------|------|
| T1    | Reference        | Reference        | Reference       | 0.47 |
| T2    | 0.4 (-0.3, 1.2)  | 0.8 (-0.4, 2.1)  | 0.3 (-0.6, 1.3) |      |
| T3    | 0.7 (0.0, 1.5)   | 0.4 (-0.8, 1.7)  | 1.1 (0.1, 2.0)  |      |
| ΣHMW  |                  |                  |                 |      |
| T1    | Reference        | Reference        | Reference       | 0.48 |
| T2    | -0.3 (-1.0, 0.4) | -0.6 (-1.8, 0.7) | 0.1 (-0.9, 1.1) |      |
| T3    | 0.4 (-0.3, 1.1)  | 0.4 (-1.0, 1.8)  | 0.5 (-0.4, 1.4) |      |
| ΣDEHP |                  |                  |                 |      |
| T1    | Reference        | Reference        | Reference       | 0.51 |
| T2    | -0.1 (-0.9, 0.7) | 0.0 (-1.2, 1.3)  | 0.0 (-1.1, 1.1) |      |
| T3    | 0.3 (-0.4, 1.0)  | 0.3 (-1.0, 1.6)  | 0.4 (-0.5, 1.2) |      |

*Abbreviations:* T1, Tertile 1; T2, Tertile 2; T3, Tertile 3; BRIEF, Behavior Rating Inventory Executive Function; MEP, monoethyl phthalate; MBP, mono-n-butyl phthalate; MiBP, mono-isobutyl phthalate; MBzP, monobenzyl phthalate; MCP, mono(3-carboxypropyl) phthalate; MCOP, mono(carboxyooctyl) phthalate; MCNP, mono(carboxynonyl) phthalate; ΣDEHP, sum of di-2-ethylhexyl phthalate metabolites; MEHP, mono(2-ethylhexyl) phthalate; MEHHP, mono(2-ethyl-5-hydroxyhexyl) phthalate; MEOHP, mono(2-ethyl-5-oxohexyl) phthalate; MECCP, mono(2-ethyl-5-carboxypentyl) phthalate; ΣHMW, sum of metabolites of high-molecular weight phthalates; ΣLMW, sum of metabolites of low-molecular weight phthalates.

Models were adjusted for maternal age at enrollment, education, country of birth, years in the U.S., depression at time of assessment; child sex, child age at time of assessment, language of assessment, HOME score, and household income at time of assessment.

<sup>a</sup>Separate models created for each phthalate metabolite or sum of metabolites (ΣDEHP, ΣHMW, ΣLMW).

<sup>b</sup>Units are ng/mL for all individual metabolites and nmol/mL for the sums of metabolites (ΣDEHP, ΣHMW, ΣLMW).

<sup>c</sup>Higher scores indicate more symptomatic behavior.

<sup>d</sup>Number of children with behavioral regulation and global executive composite data = 331, with metacognition index data = 330.

<sup>e</sup>Number of boys with behavioral regulation index and global executive composite data = 159, with metacognition index data = 158.

<sup>f</sup>Number of girls with data = 172.



**Table S7.** Adjusted associations [ $\beta$  (95% CI)] of prenatal urinary phthalate biomarker concentrations (specific gravity-adjusted)<sup>a,b</sup> categorized in tertiles with **WISC-IV cognitive outcomes<sup>c</sup> at 7 and/or 10.5 years** using GEE models for all children and stratified by child sex, CHAMACOS.

|                                | All children <sup>d</sup> | Boys <sup>e</sup> | Girls <sup>f</sup> | p-int |
|--------------------------------|---------------------------|-------------------|--------------------|-------|
| <b>Full-Scale IQ</b>           |                           |                   |                    |       |
| $\Sigma$ LMW                   |                           |                   |                    |       |
| T1                             | Reference                 | Reference         | Reference          | 0.88  |
| T2                             | -2.8 (-5.1, -0.5)         | -0.7 (-4.0, 2.7)  | -3.7 (-7.1, -0.3)  |       |
| T3                             | -1.5 (-4.0, 1.0)          | -1.5 (-5.3, 2.3)  | -1.5 (-5.0, 2.0)   |       |
| $\Sigma$ HMW                   |                           |                   |                    |       |
| T1                             | Reference                 | Reference         | Reference          | <0.01 |
| T2                             | 1.1 (-1.4, 3.5)           | -1.3 (-5.1, 2.6)  | 3.6 (0.1, 7.0)     |       |
| T3                             | 1.9 (-0.6, 4.4)           | -2.8 (-7.0, 1.4)  | 5.8 (2.7, 8.9)     |       |
| $\Sigma$ DEHP                  |                           |                   |                    |       |
| T1                             | Reference                 | Reference         | Reference          | 0.02  |
| T2                             | 1.2 (-1.3, 3.6)           | -0.6 (-4.2, 3.1)  | 2.9 (-0.7, 6.4)    |       |
| T3                             | 1.4 (-1.2, 3.9)           | -1.9 (-6.0, 2.2)  | 4.1 (0.9, 7.4)     |       |
| <b>Verbal Comprehension IQ</b> |                           |                   |                    |       |
| $\Sigma$ LMW                   |                           |                   |                    |       |
| T1                             | Reference                 | Reference         | Reference          | 0.87  |
| T2                             | -1.6 (-3.9, 0.7)          | 0.0 (-3.5, 3.5)   | -3.2 (-6.4, 0.0)   |       |
| T3                             | -1.4 (-4.0, 1.1)          | -1.8 (-5.7, 2.2)  | -1.8 (-5.4, 1.7)   |       |
| $\Sigma$ HMW                   |                           |                   |                    |       |
| T1                             | Reference                 | Reference         | Reference          | 0.16  |
| T2                             | 0.0 (-2.5, 2.4)           | 0.3 (-3.5, 4.2)   | 0.5 (-2.8, 3.7)    |       |
| T3                             | 0.6 (-1.9, 3.1)           | -1.1 (-5.2, 3.0)  | 2.7 (-0.6, 5.9)    |       |
| $\Sigma$ DEHP                  |                           |                   |                    |       |
| T1                             | Reference                 | Reference         | Reference          | 0.37  |
| T2                             | -0.4 (-2.8, 2.0)          | -0.5 (-4.2, 3.3)  | 0.2 (-3.2, 3.6)    |       |
| T3                             | -0.6 (-3.1, 1.9)          | -1.5 (-5.6, 2.6)  | 0.7 (-2.6, 4.0)    |       |
| <b>Perceptual Reasoning IQ</b> |                           |                   |                    |       |
| $\Sigma$ LMW                   |                           |                   |                    |       |
| T1                             | Reference                 | Reference         | Reference          | 0.63  |
| T2                             | -0.6 (-3.5, 2.2)          | 1.4 (-2.7, 5.5)   | -1.7 (-5.7, 2.4)   |       |
| T3                             | 0.2 (-2.7, 3.2)           | 1.5 (-3.0, 5.9)   | 0.0 (-4.1, 4.1)    |       |
| $\Sigma$ HMW                   |                           |                   |                    |       |
| T1                             | Reference                 | Reference         | Reference          | 0.10  |
| T2                             | 3.6 (0.6, 6.6)            | 1.1 (-3.5, 5.6)   | 5.4 (1.1, 9.6)     |       |
| T3                             | 2.8 (-0.1, 5.8)           | -0.9 (-5.9, 4.0)  | 5.2 (1.3, 9.2)     |       |
| $\Sigma$ DEHP                  |                           |                   |                    |       |

|                            |                   |                   |                   |       |
|----------------------------|-------------------|-------------------|-------------------|-------|
| T1                         | Reference         | Reference         | Reference         | 0.24  |
| T2                         | 4.0 (1.1, 6.9)    | 2.6 (-1.8, 7.0)   | 4.5 (0.4, 8.7)    |       |
| T3                         | 1.8 (-1.2, 4.8)   | -1.0 (-5.7, 3.8)  | 3.5 (-0.5, 7.6)   |       |
| <b>Working Memory IQ</b>   |                   |                   |                   |       |
| ΣLMW                       |                   |                   |                   |       |
| T1                         | Reference         | Reference         | Reference         | 0.70  |
| T2                         | -4.4 (-6.9, -2.0) | -1.2 (-4.8, 2.3)  | -5.8 (-9.2, -2.5) |       |
| T3                         | -2.6 (-5.0, -0.1) | -2.6 (-6.4, 1.1)  | -2.9 (-6.3, 0.5)  |       |
| ΣHMW                       |                   |                   |                   |       |
| T1                         | Reference         | Reference         | Reference         | <0.01 |
| T2                         | -0.6 (-3.1, 1.9)  | -2.3 (-6.2, 1.5)  | 1.6 (-1.7, 5.0)   |       |
| T3                         | 0.4 (-2.0, 2.8)   | -4.0 (-7.8, -0.2) | 4.4 (1.4, 7.4)    |       |
| ΣDEHP                      |                   |                   |                   |       |
| T1                         | Reference         | Reference         | Reference         | <0.01 |
| T2                         | -0.4 (-3.0, 2.1)  | -2.8 (-6.6, 1.0)  | 2.3 (-1.2, 5.8)   |       |
| T3                         | 0.2 (-2.1, 2.6)   | -3.4 (-7.1, 0.3)  | 3.7 (0.6, 6.8)    |       |
| <b>Processing Speed IQ</b> |                   |                   |                   |       |
| ΣLMW                       |                   |                   |                   |       |
| T1                         | Reference         | Reference         | Reference         | 0.70  |
| T2                         | -2.6 (-5.2, -0.1) | -3.9 (-8.2, 0.4)  | -0.9 (-4.2, 2.4)  |       |
| T3                         | -0.2 (-2.6, 2.2)  | -0.8 (-4.5, 3.0)  | 0.3 (-2.9, 3.5)   |       |
| ΣHMW                       |                   |                   |                   |       |
| T1                         | Reference         | Reference         | Reference         | 0.01  |
| T2                         | 1.2 (-1.3, 3.7)   | -1.5 (-5.6, 2.6)  | 3.8 (0.5, 7.2)    |       |
| T3                         | 2.3 (-0.2, 4.8)   | -1.6 (-6.2, 2.9)  | 5.2 (2.2, 8.3)    |       |
| ΣDEHP                      |                   |                   |                   |       |
| T1                         | Reference         | Reference         | Reference         | 0.19  |
| T2                         | 1.4 (-1.1, 4.0)   | 0.5 (-3.7, 4.6)   | 2.7 (-0.6, 6.1)   |       |
| T3                         | 3.1 (0.6, 5.6)    | 1.1 (-3.4, 5.7)   | 4.7 (1.6, 7.8)    |       |

*Abbreviations:* T1, Tertile 1; T2, Tertile 2; T3, Tertile 3; WISC-IV, Wechsler Intelligence Scale for Children 4th edition; FSIQ, full scale intellectual quotient (IQ); VCIQ, verbal comprehension IQ; PRIQ, perceptual reasoning IQ; WMIQ, working memory IQ; PSIQ, processing speed IQ; MEP, monoethyl phthalate; MBP, mono-n-butyl phthalate; MiBP, mono-isobutyl phthalate; MBzP, monobenzyl phthalate; MCP, mono(3-carboxypropyl) phthalate; MCOP, mono(carboxyoctyl) phthalate; MCNP, mono(carboxynonyl) phthalate; ΣDEHP, sum of di(2-ethylhexyl) phthalate metabolites; MEHP, mono(2-ethylhexyl) phthalate; MEHHP, mono(2-ethyl-5-hydroxyhexyl) phthalate; MEOHP, mono(2-ethyl-5-oxohexyl) phthalate; MECCP, mono(2-ethyl-5-carboxypentyl) phthalate; ΣHMW, sum of metabolites of high-molecular weight phthalates; ΣLMW, sum of metabolites of low-molecular weight phthalates.

Models were adjusted for maternal age at enrollment, education, country of birth, years in the U.S., depression at time of assessment; child sex, child age at time of assessment, language of assessment, HOME score, and household income at time of assessment.

<sup>a</sup>Separate models created for each phthalate metabolite or sum of metabolites (ΣDEHP, ΣHMW, ΣLMW).

<sup>b</sup>Units are ng/mL for all individual metabolites and nmol/mL for the sums of metabolites

(ΣDEHP, ΣHMW, ΣLMW).

<sup>c</sup>Higher scores indicate more symptomatic behavior.

<sup>d</sup>Number of children with FSIQ data = 321, with VCIQ and PRIQ data = 324, with WMIQ and PSIQ data = 323.

<sup>e</sup>Number of boys with FSIQ data = 154, with VCIQ and PRIQ data = 157, with WMIQ and PSIQ data = 156.

<sup>f</sup>Number of girls with FSIQ, VCIQ, PRIQ, WMIQ, and PSIQ data = 167

**Table S8.** Adjusted associations [ $\beta$  (95% CI)] of prenatal urinary phthalate biomarker concentrations (specific gravity-adjusted)<sup>a,b</sup> categorized in tertiles with **social cognition outcomes<sup>c</sup> at 7, 9, and 14 years** using linear regression models for all children and stratified by child sex, CHAMACOS.

|                 | All children <sup>d</sup> | Boys <sup>e</sup> | Girls <sup>f</sup> | p-int |
|-----------------|---------------------------|-------------------|--------------------|-------|
| <b>SRS</b>      |                           |                   |                    |       |
| $\Sigma$ LMW    |                           |                   |                    |       |
| T1              | Reference                 | Reference         | Reference          | 0.79  |
| T2              | 0.6 (-1.7, 2.8)           | 0.7 (-2.7, 4.1)   | 0.8 (-2.2, 3.9)    |       |
| T3              | 1.6 (-0.4, 3.6)           | 2.1 (-1.0, 5.3)   | 2.0 (-0.9, 4.9)    |       |
| $\Sigma$ HMW    |                           |                   |                    |       |
| T1              | Reference                 | Reference         | Reference          | 0.57  |
| T2              | -1.3 (-3.5, 0.9)          | 1.2 (-2.0, 4.3)   | -2.6 (-5.9, 0.7)   |       |
| T3              | -1.6 (-3.8, 0.6)          | -0.1 (-3.4, 3.2)  | -1.2 (-4.5, 2.0)   |       |
| $\Sigma$ DEHP   |                           |                   |                    |       |
| T1              | Reference                 | Reference         | Reference          | 0.67  |
| T2              | -0.6 (-2.9, 1.8)          | 0.9 (-2.5, 4.2)   | -0.7 (-4.3, 2.8)   |       |
| T3              | -1.6 (-3.7, 0.6)          | -0.4 (-3.6, 2.9)  | -1.3 (-4.7, 2.1)   |       |
| <b>ENI</b>      |                           |                   |                    |       |
| $\Sigma$ LMW    |                           |                   |                    |       |
| T1              | Reference                 | Reference         | Reference          | 0.45  |
| T2              | 0.1 (-0.2, 0.5)           | -0.1 (-0.7, 0.4)  | 0.3 (-0.2, 0.8)    |       |
| T3              | 0.2 (-0.1, 0.6)           | 0.2 (-0.3, 0.7)   | 0.4 (-0.1, 0.9)    |       |
| $\Sigma$ HMW    |                           |                   |                    |       |
| T1              | Reference                 | Reference         | Reference          | 0.33  |
| T2              | 0.0 (-0.4, 0.3)           | -0.1 (-0.6, 0.4)  | -0.2 (-0.7, 0.3)   |       |
| T3              | 0.2 (-0.2, 0.5)           | -0.1 (-0.6, 0.5)  | 0.4 (-0.1, 0.8)    |       |
| $\Sigma$ DEHP   |                           |                   |                    |       |
| T1              | Reference                 | Reference         | Reference          | 0.25  |
| T2              | 0.2 (-0.2, 0.5)           | -0.1 (-0.5, 0.4)  | 0.2 (-0.3, 0.7)    |       |
| T3              | 0.3 (-0.1, 0.6)           | 0.0 (-0.6, 0.6)   | 0.6 (0.1, 1.0)     |       |
| <b>NEPSY-II</b> |                           |                   |                    |       |
| $\Sigma$ LMW    |                           |                   |                    |       |
| T1              | Reference                 | Reference         | Reference          | 0.71  |
| T2              | -0.4 (-1.5, 0.6)          | -0.9 (-2.5, 0.7)  | 0.0 (-1.5, 1.5)    |       |
| T3              | -0.1 (-1.2, 0.9)          | -0.5 (-2.1, 1.1)  | 0.1 (-1.4, 1.5)    |       |
| $\Sigma$ HMW    |                           |                   |                    |       |
| T1              | Reference                 | Reference         | Reference          | 0.86  |
| T2              | -1.1 (-2.1, -0.1)         | -1.7 (-3.3, -0.1) | -0.6 (-2.0, 0.8)   |       |
| T3              | -0.8 (-1.8, 0.2)          | -0.8 (-2.5, 0.9)  | -0.8 (-2.3, 0.7)   |       |
| $\Sigma$ DEHP   |                           |                   |                    |       |
| T1              | Reference                 | Reference         | Reference          | 0.59  |
| T2              | -0.7 (-1.7, 0.3)          | -1.6 (-3.2, 0.0)  | 0.1 (-1.3, 1.5)    |       |
| T3              | -0.9 (-1.9, 0.1)          | -1.1 (-2.8, 0.7)  | -0.8 (-2.2, 0.6)   |       |

*Abbreviations:* T1, Tertile 1; T2, Tertile 2; T3, Tertile 3; SRS, Social Responsiveness Scale, Version 2; ENI, Evaluación Neuropsicológica del Niño; NEPSY-II, A Developmental Neuropsychological Assessment, 2<sup>nd</sup> edition;; MBP, mono-n-butyl phthalate; MiBP, mono-isobutyl phthalate; MBzP, monobenzyl phthalate; MCP, mono(3-carboxypropyl) phthalate; MCOP, mono(carboxyooctyl) phthalate; MCNP, mono(carboxynonyl) phthalate;  $\Sigma$ DEHP, sum of di(2-ethylhexyl) phthalate metabolites; MEHP, mono(2-ethylhexyl) phthalate; MEHHP, mono(2-ethyl-5-hydroxyhexyl) phthalate; MEOHP, mono(2-ethyl-5-oxohexyl) phthalate; MECCP, mono(2-ethyl-5-carboxypentyl) phthalate;  $\Sigma$ HMW, sum of metabolites of high-molecular weight phthalates;  $\Sigma$ LMW, sum of metabolites of low-molecular weight phthalates.

Models were adjusted for maternal age at enrollment, education, country of birth, years in the U.S., depression at time of assessment; child sex, child age at time of assessment, language of assessment, HOME score, and household income at time of assessment.

<sup>a</sup>Separate models created for each phthalate metabolite or sum of metabolites ( $\Sigma$ DEHP,  $\Sigma$ HMW,  $\Sigma$ LMW).

<sup>b</sup>Units are ng/mL for all individual metabolites and nmol/mL for the sums of metabolites ( $\Sigma$ DEHP,  $\Sigma$ HMW,  $\Sigma$ LMW).

<sup>c</sup>Higher scores indicate more symptomatic behavior.

<sup>d</sup>Number of children with SRS data = 245, with ENI data = 313, with NEPSY-II data = 310.

<sup>e</sup>Number of boys with SRS data = 113, with ENI data = 144, with NEPSY-II data = 143.

<sup>f</sup>Number of girls with SRS data = 132, with ENI data = 169, with NEPSY-II data = 167.

**Table S9.** Adjusted associations [ $\beta$  (95% CI)] of prenatal urinary phthalate biomarker concentrations (specific gravity-adjusted)<sup>a,b</sup> categorized in tertiles with **CADS behavioral outcomes<sup>c</sup> at 7, 9, and/or 12 years** using GEE models for all children and stratified by child sex, CHAMACOS.

|                                              | All children <sup>d</sup> | Boys <sup>e</sup> | Girls <sup>f</sup> | p-int |
|----------------------------------------------|---------------------------|-------------------|--------------------|-------|
| <b>Parent-Report</b>                         |                           |                   |                    |       |
| <b>ADHD Index</b>                            |                           |                   |                    |       |
| $\Sigma$ LMW                                 |                           |                   |                    |       |
| T1                                           | Reference                 | Reference         | Reference          | 0.48  |
| T2                                           | 0.4 (-1.0, 1.7)           | 1.4 (-0.6, 3.3)   | -2.1 (-3.9, -0.3)  |       |
| T3                                           | -1.0 (-2.3, 0.2)          | -0.3 (-2.0, 1.4)  | -1.4 (-3.3, 0.6)   |       |
| $\Sigma$ HMW                                 |                           |                   |                    |       |
| T1                                           | Reference                 | Reference         | Reference          | 0.68  |
| T2                                           | -0.3 (-1.5, 1.0)          | 0.1 (-1.8, 2.1)   | -0.4 (-2.3, 1.5)   |       |
| T3                                           | -1.2 (-2.5, 0.1)          | -0.6 (-2.4, 1.2)  | -1.2 (-3.1, 0.7)   |       |
| $\Sigma$ DEHP                                |                           |                   |                    |       |
| T1                                           | Reference                 | Reference         | Reference          | 0.86  |
| T2                                           | 0.4 (-0.9, 1.7)           | -0.3 (-2.2, 1.7)  | 1.3 (-0.5, 3.1)    |       |
| T3                                           | -1.3 (-2.5, 0.0)          | -1.2 (-2.9, 0.6)  | -1.1 (-2.9, 0.7)   |       |
| <b>DSM-IV Total Scale</b>                    |                           |                   |                    |       |
| $\Sigma$ LMW                                 |                           |                   |                    |       |
| T1                                           | Reference                 | Reference         | Reference          | 0.56  |
| T2                                           | 0.3 (-1.1, 1.7)           | 1.3 (-0.8, 3.3)   | -0.4 (-2.4, 1.7)   |       |
| T3                                           | -1.1 (-2.4, 0.3)          | -0.6 (-2.4, 1.3)  | -1.3 (-3.3, 0.7)   |       |
| $\Sigma$ HMW                                 |                           |                   |                    |       |
| T1                                           | Reference                 | Reference         | Reference          | 0.9   |
| T2                                           | -1.0 (-2.3, 0.3)          | -0.1 (-2.2, 1.9)  | -1.3 (-3.2, 0.6)   |       |
| T3                                           | -1.0 (-2.3, 0.4)          | -0.3 (-2.1, 1.6)  | -0.8 (-2.9, 1.2)   |       |
| $\Sigma$ DEHP                                |                           |                   |                    |       |
| T1                                           | Reference                 | Reference         | Reference          | 0.76  |
| T2                                           | -0.5 (-1.8, 0.9)          | -0.3 (-2.4, 1.7)  | -0.1 (-2.0, 1.8)   |       |
| T3                                           | -1.2 (-2.5, 0.1)          | -1.2 (-3.0, 0.7)  | -0.7 (-2.7, 1.2)   |       |
| <b>DSM-IV Inattentive subscale</b>           |                           |                   |                    |       |
| $\Sigma$ LMW                                 |                           |                   |                    |       |
| T1                                           | Reference                 | Reference         | Reference          | 0.34  |
| T2                                           | 0.2 (-1.0, 1.5)           | 0.8 (-0.9, 2.5)   | -0.2 (-2.1, 1.6)   |       |
| T3                                           | -1.0 (-2.2, 0.1)          | -0.3 (-1.9, 1.3)  | -1.4 (-3.2, 0.3)   |       |
| $\Sigma$ HMW                                 |                           |                   |                    |       |
| T1                                           | Reference                 | Reference         | Reference          | 0.99  |
| T2                                           | -0.8 (-2.0, 0.4)          | -0.6 (-2.4, 1.3)  | -0.9 (-2.6, 0.9)   |       |
| T3                                           | -1.1 (-2.4, 0.1)          | -0.7 (-2.4, 1.0)  | -0.9 (-2.8, 1.0)   |       |
| $\Sigma$ DEHP                                |                           |                   |                    |       |
| T1                                           | Reference                 | Reference         | Reference          | 0.64  |
| T2                                           | -0.3 (-1.5, 1.0)          | -0.7 (-2.6, 1.1)  | 0.4 (-1.4, 2.1)    |       |
| T3                                           | -1.1 (-2.3, 0.1)          | -1.4 (-3.1, 0.3)  | -0.6 (-2.3, 1.2)   |       |
| <b>DSM-IV Hyperactive/impulsive subscale</b> |                           |                   |                    |       |
| $\Sigma$ LMW                                 |                           |                   |                    |       |
| T1                                           | Reference                 | Reference         | Reference          | 0.99  |

|                                           |                  |                  |                  |      |
|-------------------------------------------|------------------|------------------|------------------|------|
| T2                                        | 0.3 (-1.2, 1.9)  | 1.7 (-0.7, 4.1)  | -0.5 (-2.6, 1.6) |      |
| T3                                        | -0.9 (-2.4, 0.5) | -0.9 (-3.0, 1.2) | -0.9 (-3.0, 1.3) |      |
| ΣHMW                                      |                  |                  |                  |      |
| T1                                        | Reference        | Reference        | Reference        | 0.88 |
| T2                                        | -1.0 (-2.4, 0.5) | 0.4 (-1.9, 2.7)  | -1.5 (-3.5, 0.5) |      |
| T3                                        | -0.5 (-1.9, 0.9) | 0.4 (-1.8, 2.6)  | -0.5 (-2.6, 1.6) |      |
| ΣDEHP                                     |                  |                  |                  |      |
| T1                                        | Reference        | Reference        | Reference        | 0.87 |
| T2                                        | -0.6 (-2.1, 0.8) | 0.4 (-1.9, 2.7)  | -0.9 (-2.8, 1.1) |      |
| T3                                        | -1.1 (-2.5, 0.3) | -0.7 (-2.8, 1.4) | -0.8 (-2.8, 1.2) |      |
| <b>Teacher-Report</b>                     |                  |                  |                  |      |
| <b><i>ADHD Index</i></b>                  |                  |                  |                  |      |
| ΣLMW                                      |                  |                  |                  |      |
| T1                                        | Reference        | Reference        | Reference        | 0.57 |
| T2                                        | 0.6 (-3.0, 4.1)  | 2.5 (-2.6, 7.6)  | -1.4 (-6.4, 3.7) |      |
| T3                                        | -0.8 (-4.3, 2.6) | -0.1 (-4.8, 4.7) | -2.1 (-7.3, 3.1) |      |
| ΣHMW                                      |                  |                  |                  |      |
| T1                                        | Reference        | Reference        | Reference        | 0.12 |
| T2                                        | -1.7 (-5.2, 1.8) | -1.8 (-6.7, 3.1) | -1.8 (-7.3, 3.6) |      |
| T3                                        | -0.9 (-4.6, 2.7) | 2.2 (-3.0, 7.4)  | -4.1 (-9.6, 1.5) |      |
| ΣDEHP                                     |                  |                  |                  |      |
| T1                                        | Reference        | Reference        | Reference        | 0.36 |
| T2                                        | 0.8 (-2.8, 4.3)  | 1.3 (-3.6, 6.2)  | -0.1 (-5.7, 5.5) |      |
| T3                                        | -1.6 (-5.1, 1.9) | 0.1 (-5.0, 5.2)  | -3.9 (-9.2, 1.5) |      |
| <b><i>DSM-IV Total Scale</i></b>          |                  |                  |                  |      |
| ΣLMW                                      |                  |                  |                  |      |
| T1                                        | Reference        | Reference        | Reference        | 0.95 |
| T2                                        | 0.4 (-2.6, 3.3)  | 0.8 (-3.6, 5.1)  | -0.1 (-4.3, 4.0) |      |
| T3                                        | -0.4 (-3.3, 2.6) | -0.4 (-4.5, 3.7) | -0.7 (-5.1, 3.7) |      |
| ΣHMW                                      |                  |                  |                  |      |
| T1                                        | Reference        | Reference        | Reference        | 0.10 |
| T2                                        | -1.1 (-4.1, 1.9) | -1.2 (-5.3, 2.9) | -1.1 (-5.7, 3.5) |      |
| T3                                        | -0.4 (-3.5, 2.7) | 2.5 (-2.0, 7.0)  | -3.3 (-7.9, 1.3) |      |
| ΣDEHP                                     |                  |                  |                  |      |
| T1                                        | Reference        | Reference        | Reference        | 0.29 |
| T2                                        | 0.6 (-2.4, 3.7)  | 1.4 (-2.8, 5.6)  | -0.1 (-4.7, 4.4) |      |
| T3                                        | -0.8 (-3.8, 2.2) | 1.1 (-3.3, 5.5)  | -2.9 (-7.5, 1.6) |      |
| <b><i>DSM-IV Inattentive subscale</i></b> |                  |                  |                  |      |
| ΣLMW                                      |                  |                  |                  |      |
| T1                                        | Reference        | Reference        | Reference        | 0.97 |
| T2                                        | 0.7 (-1.9, 3.3)  | 0.2 (-4.2, 4.6)  | 1.0 (-2.2, 4.2)  |      |
| T3                                        | -0.1 (-2.7, 2.6) | -0.3 (-4.4, 3.8) | -0.2 (-3.6, 3.2) |      |
| ΣHMW                                      |                  |                  |                  |      |
| T1                                        | Reference        | Reference        | Reference        | 0.08 |
| T2                                        | -1.0 (-3.6, 1.6) | -1.7 (-5.7, 2.4) | -0.6 (-4.1, 3.0) |      |
| T3                                        | -0.5 (-3.1, 2.2) | 2.6 (-1.9, 7.1)  | -3.1 (-6.5, 0.3) |      |
| ΣDEHP                                     |                  |                  |                  |      |

|                                                                                                                                                                                                                                                                                                                                                                                                                                                                                                                                                                                                                                                                                                                                                                                                                                                                                                                                                                                                                                                                                                                                                                                                                                                                                                                                                                                                                                                                                                                                                                                                                                                                                                                                                                                                                                                                                                                                                                                                                                                                                                                                                                                                                  |                  |                 |                  |      |
|------------------------------------------------------------------------------------------------------------------------------------------------------------------------------------------------------------------------------------------------------------------------------------------------------------------------------------------------------------------------------------------------------------------------------------------------------------------------------------------------------------------------------------------------------------------------------------------------------------------------------------------------------------------------------------------------------------------------------------------------------------------------------------------------------------------------------------------------------------------------------------------------------------------------------------------------------------------------------------------------------------------------------------------------------------------------------------------------------------------------------------------------------------------------------------------------------------------------------------------------------------------------------------------------------------------------------------------------------------------------------------------------------------------------------------------------------------------------------------------------------------------------------------------------------------------------------------------------------------------------------------------------------------------------------------------------------------------------------------------------------------------------------------------------------------------------------------------------------------------------------------------------------------------------------------------------------------------------------------------------------------------------------------------------------------------------------------------------------------------------------------------------------------------------------------------------------------------|------------------|-----------------|------------------|------|
| T1                                                                                                                                                                                                                                                                                                                                                                                                                                                                                                                                                                                                                                                                                                                                                                                                                                                                                                                                                                                                                                                                                                                                                                                                                                                                                                                                                                                                                                                                                                                                                                                                                                                                                                                                                                                                                                                                                                                                                                                                                                                                                                                                                                                                               | Reference        | Reference       | Reference        | 0.26 |
| T2                                                                                                                                                                                                                                                                                                                                                                                                                                                                                                                                                                                                                                                                                                                                                                                                                                                                                                                                                                                                                                                                                                                                                                                                                                                                                                                                                                                                                                                                                                                                                                                                                                                                                                                                                                                                                                                                                                                                                                                                                                                                                                                                                                                                               | 0.1 (-2.5, 2.7)  | 0.8 (-3.4, 5.0) | -0.7 (-4.1, 2.8) |      |
| T3                                                                                                                                                                                                                                                                                                                                                                                                                                                                                                                                                                                                                                                                                                                                                                                                                                                                                                                                                                                                                                                                                                                                                                                                                                                                                                                                                                                                                                                                                                                                                                                                                                                                                                                                                                                                                                                                                                                                                                                                                                                                                                                                                                                                               | -0.7 (-3.3, 2.0) | 1.4 (-3.1, 5.9) | -2.5 (-5.9, 0.8) |      |
| <b><i>DSM-IV Hyperactive/impulsive subscale</i></b>                                                                                                                                                                                                                                                                                                                                                                                                                                                                                                                                                                                                                                                                                                                                                                                                                                                                                                                                                                                                                                                                                                                                                                                                                                                                                                                                                                                                                                                                                                                                                                                                                                                                                                                                                                                                                                                                                                                                                                                                                                                                                                                                                              |                  |                 |                  |      |
| ΣLMW                                                                                                                                                                                                                                                                                                                                                                                                                                                                                                                                                                                                                                                                                                                                                                                                                                                                                                                                                                                                                                                                                                                                                                                                                                                                                                                                                                                                                                                                                                                                                                                                                                                                                                                                                                                                                                                                                                                                                                                                                                                                                                                                                                                                             |                  |                 |                  |      |
| T1                                                                                                                                                                                                                                                                                                                                                                                                                                                                                                                                                                                                                                                                                                                                                                                                                                                                                                                                                                                                                                                                                                                                                                                                                                                                                                                                                                                                                                                                                                                                                                                                                                                                                                                                                                                                                                                                                                                                                                                                                                                                                                                                                                                                               | Reference        | Reference       | Reference        | 0.90 |
| T2                                                                                                                                                                                                                                                                                                                                                                                                                                                                                                                                                                                                                                                                                                                                                                                                                                                                                                                                                                                                                                                                                                                                                                                                                                                                                                                                                                                                                                                                                                                                                                                                                                                                                                                                                                                                                                                                                                                                                                                                                                                                                                                                                                                                               | 0.0 (-3.2, 3.1)  | 1.0 (-3.5, 5.6) | -1.0 (-5.3, 3.4) |      |
| T3                                                                                                                                                                                                                                                                                                                                                                                                                                                                                                                                                                                                                                                                                                                                                                                                                                                                                                                                                                                                                                                                                                                                                                                                                                                                                                                                                                                                                                                                                                                                                                                                                                                                                                                                                                                                                                                                                                                                                                                                                                                                                                                                                                                                               | -0.2 (-3.3, 3.0) | 0.0 (-4.3, 4.4) | -0.6 (-5.1, 4.0) |      |
| ΣHMW                                                                                                                                                                                                                                                                                                                                                                                                                                                                                                                                                                                                                                                                                                                                                                                                                                                                                                                                                                                                                                                                                                                                                                                                                                                                                                                                                                                                                                                                                                                                                                                                                                                                                                                                                                                                                                                                                                                                                                                                                                                                                                                                                                                                             |                  |                 |                  |      |
| T1                                                                                                                                                                                                                                                                                                                                                                                                                                                                                                                                                                                                                                                                                                                                                                                                                                                                                                                                                                                                                                                                                                                                                                                                                                                                                                                                                                                                                                                                                                                                                                                                                                                                                                                                                                                                                                                                                                                                                                                                                                                                                                                                                                                                               | Reference        | Reference       | Reference        | 0.24 |
| T2                                                                                                                                                                                                                                                                                                                                                                                                                                                                                                                                                                                                                                                                                                                                                                                                                                                                                                                                                                                                                                                                                                                                                                                                                                                                                                                                                                                                                                                                                                                                                                                                                                                                                                                                                                                                                                                                                                                                                                                                                                                                                                                                                                                                               | -0.2 (-3.4, 3.1) | 0.0 (-4.4, 4.5) | 0.0 (-4.9, 4.9)  |      |
| T3                                                                                                                                                                                                                                                                                                                                                                                                                                                                                                                                                                                                                                                                                                                                                                                                                                                                                                                                                                                                                                                                                                                                                                                                                                                                                                                                                                                                                                                                                                                                                                                                                                                                                                                                                                                                                                                                                                                                                                                                                                                                                                                                                                                                               | 1.0 (-2.2, 4.2)  | 2.6 (-2.2, 7.3) | -1.3 (-6.0, 3.5) |      |
| ΣDEHP                                                                                                                                                                                                                                                                                                                                                                                                                                                                                                                                                                                                                                                                                                                                                                                                                                                                                                                                                                                                                                                                                                                                                                                                                                                                                                                                                                                                                                                                                                                                                                                                                                                                                                                                                                                                                                                                                                                                                                                                                                                                                                                                                                                                            |                  |                 |                  |      |
| T1                                                                                                                                                                                                                                                                                                                                                                                                                                                                                                                                                                                                                                                                                                                                                                                                                                                                                                                                                                                                                                                                                                                                                                                                                                                                                                                                                                                                                                                                                                                                                                                                                                                                                                                                                                                                                                                                                                                                                                                                                                                                                                                                                                                                               | Reference        | Reference       | Reference        | 0.52 |
| T2                                                                                                                                                                                                                                                                                                                                                                                                                                                                                                                                                                                                                                                                                                                                                                                                                                                                                                                                                                                                                                                                                                                                                                                                                                                                                                                                                                                                                                                                                                                                                                                                                                                                                                                                                                                                                                                                                                                                                                                                                                                                                                                                                                                                               | 2.1 (-1.1, 5.4)  | 2.3 (-2.3, 6.9) | 2.1 (-2.6, 6.7)  |      |
| T3                                                                                                                                                                                                                                                                                                                                                                                                                                                                                                                                                                                                                                                                                                                                                                                                                                                                                                                                                                                                                                                                                                                                                                                                                                                                                                                                                                                                                                                                                                                                                                                                                                                                                                                                                                                                                                                                                                                                                                                                                                                                                                                                                                                                               | 0.3 (-2.8, 3.4)  | 1.0 (-3.5, 5.5) | -1.5 (-6.2, 3.1) |      |
| <p><i>Abbreviations:</i> T1, Tertile 1; T2, Tertile 2; T3, Tertile 3; ADHD, Attention Deficit Hyperactivity Disorder; CADS, Conners' ADHD/DSM-IV Scales; DSM-IV, Diagnostic and Statistical Manual of Mental Disorders, 4th Edition; MEP, monoethyl phthalate; MBP, mono-n-butyl phthalate; MiBP, mono-isobutyl phthalate; MBzP, monobenzyl phthalate; MCP, mono(3-carboxypropyl) phthalate; MCOP, mono(carboxyoctyl) phthalate; MCNP, mono(carboxynonyl) phthalate; ΣDEHP, sum of di(2-ethylhexyl) phthalate metabolites; MEHP, mono(2-ethylhexyl) phthalate; MEHHP, mono(2-ethyl-5-hydroxyhexyl) phthalate; MEOHP, mono(2-ethyl-5-oxohexyl) phthalate; MECCP, mono(2-ethyl-5-carboxypentyl) phthalate; ΣHMW, sum of metabolites of high-molecular weight phthalates; ΣLMW, sum of metabolites of low-molecular weight phthalates.</p> <p>Models were adjusted for maternal age at enrollment, education, country of birth, years in the U.S., depression at time of assessment or interview; child sex, child age at time of assessment or interview, language of assessment or interview, HOME score, and household income at time of assessment or interview.</p> <p><sup>a</sup>Separate models created for each phthalate metabolite or sum of metabolites (ΣDEHP, ΣHMW, ΣLMW).</p> <p><sup>b</sup>Units are ng/mL for all individual metabolites and nmol/mL for the sums of metabolites (ΣDEHP, ΣHMW, ΣLMW).</p> <p><sup>c</sup>Higher scores indicate more symptomatic behavior.</p> <p><sup>d</sup>Number of children with parent-report data = 332, with teacher-report ADHD Index data=261, with teacher-report DSM-IV total scale data = 260, with teacher-report inattentive scale and hyperactive/impulsive scale data = 264.</p> <p><sup>e</sup>Number of boys with parent-report data = 159, with teacher-report ADHD Index and DSM-IV total scale data=122, with teacher-report inattentive scale and hyperactive/impulsive scale data = 123.</p> <p><sup>f</sup>Number of girls with parent-report data = 173, with teacher-report ADHD Index = 139, with teacher-report DSM-IV total scale data = 138, with teacher-report inattentive scale and hyperactive/impulsive scale data = 141.</p> |                  |                 |                  |      |



**Table S10.** Adjusted associations [ $\beta$  (95% CI)] of prenatal urinary phthalate biomarker concentrations (specific gravity-adjusted)<sup>a,b</sup> categorized in tertiles with **BASC behavioral outcomes<sup>c</sup> at 7 and/or 10.5 years** using GEE models for all children and stratified by child sex, CHAMACOS.

|                               | All children <sup>d</sup> | Boys <sup>e</sup> | Girls <sup>f</sup> | p-int |
|-------------------------------|---------------------------|-------------------|--------------------|-------|
| <b>Parent-Report</b>          |                           |                   |                    |       |
| <i>Internalizing problems</i> |                           |                   |                    |       |
| $\Sigma$ LMW                  |                           |                   |                    |       |
| T1                            | Reference                 | Reference         | Reference          | 0.89  |
| T2                            | -0.3 (-2.0, 1.4)          | 1.3 (-1.3, 3.8)   | -1.6 (-3.8, 0.7)   |       |
| T3                            | 1.4 (-0.4, 3.1)           | 2.0 (-0.5, 4.6)   | 1.7 (-0.7, 4.0)    |       |
| $\Sigma$ HMW                  |                           |                   |                    |       |
| T1                            | Reference                 | Reference         | Reference          | 0.85  |
| T2                            | 0.7 (-0.9, 2.4)           | 1.1 (-1.3, 3.5)   | 0.3 (-2.1, 2.6)    |       |
| T3                            | 1.4 (-0.4, 3.2)           | 1.8 (-0.9, 4.6)   | 1.5 (-0.8, 3.9)    |       |
| $\Sigma$ DEHP                 |                           |                   |                    |       |
| T1                            | Reference                 | Reference         | Reference          | 0.92  |
| T2                            | 0.3 (-1.3, 2.0)           | 0.2 (-2.2, 2.5)   | 0.5 (-1.7, 2.8)    |       |
| T3                            | 0.8 (-1.0, 2.7)           | 0.6 (-2.2, 3.4)   | 1.4 (-1.0, 3.8)    |       |
| <i>Depression Scale</i>       |                           |                   |                    |       |
| $\Sigma$ LMW                  |                           |                   |                    |       |
| T1                            | Reference                 | Reference         | Reference          | 0.37  |
| T2                            | 1.4 (-1.0, 3.8)           | 2.9 (-0.3, 6.1)   | 0.0 (-3.6, 3.5)    |       |
| T3                            | 1.0 (-1.5, 3.4)           | 1.6 (-1.7, 4.8)   | 0.3 (-3.3, 4.0)    |       |
| $\Sigma$ HMW                  |                           |                   |                    |       |
| T1                            | Reference                 | Reference         | Reference          | 0.31  |
| T2                            | 0.0 (-2.5, 2.4)           | 1.3 (-2.1, 4.7)   | -1.4 (-5.0, 2.2)   |       |
| T3                            | 0.0 (-2.4, 2.4)           | 0.4 (-2.8, 3.6)   | -0.7 (-4.2, 2.9)   |       |
| $\Sigma$ DEHP                 |                           |                   |                    |       |
| T1                            | Reference                 | Reference         | Reference          | 0.23  |
| T2                            | 0.0 (-2.5, 2.4)           | 0.6 (-2.7, 4.0)   | -0.7 (-4.3, 2.9)   |       |
| T3                            | 0.0 (-2.4, 2.4)           | -0.1 (-3.3, 3.2)  | -0.1 (-3.5, 3.4)   |       |
| <i>Anxiety Scale</i>          |                           |                   |                    |       |
| $\Sigma$ LMW                  |                           |                   |                    |       |
| T1                            | Reference                 | Reference         | Reference          | 0.07  |
| T2                            | 1.4 (-1.3, 4.2)           | 1.9 (-2.0, 5.9)   | 0.6 (-3.2, 4.3)    |       |
| T3                            | 1.9 (-1.0, 4.7)           | 2.5 (-1.4, 6.5)   | 1.1 (-2.8, 5.1)    |       |
| $\Sigma$ HMW                  |                           |                   |                    |       |
| T1                            | Reference                 | Reference         | Reference          | 0.08  |
| T2                            | -0.1 (-2.7, 2.6)          | 2.4 (-1.2, 5.9)   | -2.7 (-6.6, 1.3)   |       |
| T3                            | 1.0 (-1.9, 3.9)           | 1.3 (-3.0, 5.6)   | 0.1 (-3.8, 4.1)    |       |
| $\Sigma$ DEHP                 |                           |                   |                    |       |
| T1                            | Reference                 | Reference         | Reference          | 0.04  |
| T2                            | 0.1 (-2.6, 2.8)           | 2.0 (-1.6, 5.7)   | -1.8 (-5.7, 2.1)   |       |
| T3                            | 0.8 (-2.0, 3.7)           | 0.3 (-3.9, 4.4)   | 1.0 (-2.9, 4.9)    |       |
| <i>Externalizing problems</i> |                           |                   |                    |       |

|                               |                   |                        |                    |       |
|-------------------------------|-------------------|------------------------|--------------------|-------|
| $\Sigma$ LMW                  |                   |                        |                    |       |
| T1                            | Reference         | Reference              | Reference          | 0.61  |
| T2                            | 0.4 (-1.2, 2.0)   | <b>2.4 (-0.3, 5.0)</b> | -1.2 (-3.2, 0.7)   |       |
| T3                            | 0.1 (-1.5, 1.7)   | 0.5 (-2.0, 2.9)        | -0.5 (-2.5, 1.5)   |       |
| $\Sigma$ HMW                  |                   |                        |                    |       |
| T1                            | Reference         | Reference              | Reference          | 0.83  |
| T2                            | 0.1 (-1.4, 1.7)   | 0.8 (-1.9, 3.6)        | -0.1 (-2.1, 1.9)   |       |
| T3                            | 0.7 (-0.8, 2.2)   | 0.8 (-2.1, 3.6)        | 0.4 (-1.6, 2.4)    |       |
| $\Sigma$ DEHP                 |                   |                        |                    |       |
| T1                            | Reference         | Reference              | Reference          | 0.58  |
| T2                            | 0.7 (-0.9, 2.3)   | 0.3 (-2.4, 3.1)        | 1.3 (-0.7, 3.3)    |       |
| T3                            | 0.4 (-1.1, 1.8)   | -0.4 (-3.1, 2.2)       | 0.5 (-1.3, 2.4)    |       |
| <b>Attention problems</b>     |                   |                        |                    |       |
| $\Sigma$ LMW                  |                   |                        |                    |       |
| T1                            | Reference         | Reference              | Reference          | <0.01 |
| T2                            | 0.3 (-1.7, 2.3)   | 3.1 (-0.1, 6.3)        | -2.1 (-4.9, 0.6)   |       |
| T3                            | 0.0 (-1.8, 1.9)   | 3.1 (0.3, 5.9)         | -2.7 (-5.3, -0.1)  |       |
| $\Sigma$ HMW                  |                   |                        |                    |       |
| T1                            | Reference         | Reference              | Reference          | 0.81  |
| T2                            | 1.1 (-1.0, 3.1)   | 0.6 (-2.7, 3.9)        | 1.6 (-1.2, 4.4)    |       |
| T3                            | -1.6 (-3.5, 0.3)  | -1.2 (-4.4, 2.0)       | -1.8 (-4.4, 0.8)   |       |
| $\Sigma$ DEHP                 |                   |                        |                    |       |
| T1                            | Reference         | Reference              | Reference          | 0.85  |
| T2                            | 1.9 (-0.1, 3.9)   | 0.0 (-3.3, 3.2)        | 3.9 (1.3, 6.5)     |       |
| T3                            | -1.4 (-3.2, 0.5)  | -1.2 (-4.3, 2.0)       | -1.5 (-4.1, 1.0)   |       |
| <b>Hyperactivity</b>          |                   |                        |                    |       |
| $\Sigma$ LMW                  |                   |                        |                    |       |
| T1                            | Reference         | Reference              | Reference          | 0.84  |
| T2                            | 0.0 (-1.5, 1.6)   | 2.3 (-0.3, 5.0)        | -1.7 (-3.5, 0.1)   |       |
| T3                            | -0.5 (-2.0, 1.1)  | -0.6 (-3.1, 1.8)       | -0.5 (-2.4, 1.4)   |       |
| $\Sigma$ HMW                  |                   |                        |                    |       |
| T1                            | Reference         | Reference              | Reference          | 0.82  |
| T2                            | -0.4 (-2.0, 1.1)  | 0.5 (-2.3, 3.3)        | -0.8 (-2.7, 1.1)   |       |
| T3                            | 0.2 (-1.2, 1.7)   | 0.3 (-2.5, 3.1)        | 0.2 (-1.6, 2.1)    |       |
| $\Sigma$ DEHP                 |                   |                        |                    |       |
| T1                            | Reference         | Reference              | Reference          | 0.20  |
| T2                            | 0.3 (-1.2, 1.9)   | 0.1 (-2.6, 2.9)        | 1.0 (-0.9, 2.9)    |       |
| T3                            | -0.1 (-1.5, 1.3)  | -1.1 (-3.6, 1.5)       | 0.6 (-1.2, 2.4)    |       |
| <b>Teacher-Report</b>         |                   |                        |                    |       |
| <b>Internalizing problems</b> |                   |                        |                    |       |
| $\Sigma$ LMW                  |                   |                        |                    |       |
| T1                            | Reference         | Reference              | Reference          | 0.57  |
| T2                            | -5.3 (-8.8, -1.7) | -3.7 (-8.3, 1.0)       | -6.9 (-12.2, -1.6) |       |
| T3                            | -2.8 (-6.6, 1.0)  | -4.1 (-8.6, 0.5)       | -2.1 (-8.2, 3.9)   |       |
| $\Sigma$ HMW                  |                   |                        |                    |       |
| T1                            | Reference         | Reference              | Reference          | 0.84  |
| T2                            | -3.6 (-7.3, 0.1)  | -3.2 (-7.9, 1.5)       | -4.2 (-9.9, 1.4)   |       |

|                               |                   |                  |                    |      |
|-------------------------------|-------------------|------------------|--------------------|------|
| T3                            | -2.3 (-6.1, 1.6)  | -2.9 (-8.2, 2.3) | -3.4 (-9.3, 2.5)   |      |
| <b>ΣDEHP</b>                  |                   |                  |                    |      |
| T1                            | Reference         | Reference        | Reference          | 0.03 |
| T2                            | -4.2 (-7.7, -0.6) | -3.5 (-8.1, 1.2) | -5.0 (-10.4, 0.4)  |      |
| T3                            | -3.6 (-7.4, 0.3)  | -3.2 (-8.6, 2.2) | -5.6 (-11.5, 0.2)  |      |
| <b>Depression Scale</b>       |                   |                  |                    |      |
| <b>ΣLMW</b>                   |                   |                  |                    |      |
| T1                            | Reference         | Reference        | Reference          | 0.45 |
| T2                            | -4.3 (-7.3, -1.2) | -2.4 (-6.8, 2.0) | -5.8 (-10.2, -1.3) |      |
| T3                            | -2.6 (-5.8, 0.6)  | -1.5 (-5.8, 2.9) | -3.9 (-8.6, 0.8)   |      |
| <b>ΣHMW</b>                   |                   |                  |                    |      |
| T1                            | Reference         | Reference        | Reference          | 0.11 |
| T2                            | -1.9 (-4.9, 1.0)  | 0.1 (-4.1, 4.3)  | -3.8 (-8.4, 0.9)   |      |
| T3                            | -1.0 (-4.0, 2.0)  | 1.5 (-3.1, 6.2)  | -3.6 (-8.2, 0.9)   |      |
| <b>ΣDEHP</b>                  |                   |                  |                    |      |
| T1                            | Reference         | Reference        | Reference          | 0.14 |
| T2                            | -2.0 (-5.0, 1.0)  | 0.6 (-3.7, 4.8)  | -4.4 (-8.8, 0.1)   |      |
| T3                            | -3.0 (-6.0, -0.0) | -0.9 (-5.5, 3.6) | -5.7 (-10.4, -1.1) |      |
| <b>Anxiety Scale</b>          |                   |                  |                    |      |
| <b>ΣLMW</b>                   |                   |                  |                    |      |
| T1                            | Reference         | Reference        | Reference          | 0.82 |
| T2                            | -5.2 (-8.8, -1.6) | -3.2 (-7.9, 1.4) | -7.1 (-12.8, -1.5) |      |
| T3                            | -3.4 (-7.0, 0.3)  | -4.0 (-8.5, 0.4) | -3.3 (-9.1, 2.5)   |      |
| <b>ΣHMW</b>                   |                   |                  |                    |      |
| T1                            | Reference         | Reference        | Reference          | 0.86 |
| T2                            | -3.0 (-6.7, 0.7)  | -2.3 (-7.2, 2.5) | -3.5 (-9.2, 2.2)   |      |
| T3                            | -3.4 (-7.0, 0.1)  | -3.5 (-9.2, 2.1) | -4.2 (-9.7, 1.2)   |      |
| <b>ΣDEHP</b>                  |                   |                  |                    |      |
| T1                            | Reference         | Reference        | Reference          | 0.45 |
| T2                            | -3.6 (-7.3, 0.1)  | -2.6 (-7.4, 2.2) | -4.4 (-9.9, 1.2)   |      |
| T3                            | -4.5 (-8.1, -0.9) | -2.9 (-8.5, 2.8) | -6.7 (-12.2, -1.1) |      |
| <b>Externalizing problems</b> |                   |                  |                    |      |
| <b>ΣLMW</b>                   |                   |                  |                    |      |
| T1                            | Reference         | Reference        | Reference          | 0.39 |
| T2                            | -0.7 (-3.4, 2.1)  | 0.5 (-4.3, 5.2)  | -1.6 (-4.8, 1.5)   |      |
| T3                            | -0.7 (-3.7, 2.4)  | 0.8 (-4.3, 5.9)  | -2.2 (-5.5, 1.1)   |      |
| <b>ΣHMW</b>                   |                   |                  |                    |      |
| T1                            | Reference         | Reference        | Reference          | 0.43 |
| T2                            | -1.3 (-4.1, 1.4)  | 0.7 (-4.2, 5.7)  | -2.4 (-5.4, 0.7)   |      |
| T3                            | 0.5 (-2.4, 3.4)   | 1.4 (-3.6, 6.5)  | -1.0 (-4.6, 2.6)   |      |
| <b>ΣDEHP</b>                  |                   |                  |                    |      |
| T1                            | Reference         | Reference        | Reference          | 0.79 |
| T2                            | 1.0 (-2.1, 4.0)   | 3.1 (-2.0, 8.2)  | -0.4 (-3.6, 2.9)   |      |
| T3                            | 0.0 (-2.7, 2.7)   | 0.3 (-4.4, 5.1)  | -1.1 (-4.6, 2.4)   |      |
| <b>Attention problems</b>     |                   |                  |                    |      |
| <b>ΣLMW</b>                   |                   |                  |                    |      |
| T1                            | Reference         | Reference        | Reference          | 0.78 |

|                               |                  |                  |                    |      |
|-------------------------------|------------------|------------------|--------------------|------|
| T2                            | 0.1 (-2.3, 2.4)  | 0.0 (-3.8, 3.8)  | -0.1 (-3.1, 2.9)   |      |
| T3                            | -0.4 (-2.7, 1.9) | -0.3 (-3.7, 3.1) | -0.9 (-4.2, 2.3)   |      |
| <b>ΣHMW</b>                   |                  |                  |                    |      |
| T1                            | Reference        | Reference        | Reference          | 0.49 |
| T2                            | -0.8 (-3.1, 1.4) | -1.6 (-5.2, 1.9) | -0.3 (-3.5, 2.9)   |      |
| T3                            | -1.0 (-3.3, 1.3) | 0.2 (-3.8, 4.1)  | -2.0 (-5.2, 1.2)   |      |
| <b>ΣDEHP</b>                  |                  |                  |                    |      |
| T1                            | Reference        | Reference        | Reference          | 0.96 |
| T2                            | 0.3 (-2.0, 2.5)  | 0.8 (-2.5, 4.1)  | -0.4 (-3.6, 2.8)   |      |
| T3                            | -1.2 (-3.5, 1.1) | -0.9 (-4.8, 3.0) | -1.5 (-4.8, 1.7)   |      |
| <b>Hyperactivity</b>          |                  |                  |                    |      |
| <b>ΣLMW</b>                   |                  |                  |                    |      |
| T1                            | Reference        | Reference        | Reference          | 0.71 |
| T2                            | 0.0 (-2.9, 2.8)  | 1.4 (-3.6, 6.5)  | -1.2 (-4.4, 2.0)   |      |
| T3                            | -0.1 (-3.1, 3.0) | 0.6 (-4.5, 5.6)  | -0.9 (-4.4, 2.6)   |      |
| <b>ΣHMW</b>                   |                  |                  |                    |      |
| T1                            | Reference        | Reference        | Reference          | 0.52 |
| T2                            | -1.7 (-4.7, 1.3) | -0.7 (-5.8, 4.4) | -2.1 (-5.6, 1.3)   |      |
| T3                            | -0.1 (-3.1, 2.9) | 0.4 (-4.8, 5.7)  | -1.5 (-5.2, 2.3)   |      |
| <b>ΣDEHP</b>                  |                  |                  |                    |      |
| T1                            | Reference        | Reference        | Reference          | 0.85 |
| T2                            | 0.7 (-2.4, 3.9)  | 1.8 (-3.4, 7.1)  | 0.0 (-3.5, 3.5)    |      |
| T3                            | -0.6 (-3.4, 2.3) | -0.6 (-5.5, 4.4) | -1.6 (-5.2, 2.0)   |      |
| <b>Self-Report</b>            |                  |                  |                    |      |
| <b>Internalizing problems</b> |                  |                  |                    |      |
| <b>ΣLMW</b>                   |                  |                  |                    |      |
| T1                            | Reference        | Reference        | Reference          | 0.62 |
| T2                            | 0.8 (-2.1, 3.8)  | 1.6 (-2.9, 6.1)  | 0.5 (-3.8, 4.8)    |      |
| T3                            | 3.2 (0.3, 6.2)   | 5.0 (0.9, 9.1)   | 2.5 (-1.9, 6.8)    |      |
| <b>ΣHMW</b>                   |                  |                  |                    |      |
| T1                            | Reference        | Reference        | Reference          | 0.93 |
| T2                            | -2.8 (-5.8, 0.3) | 1.3 (-3.1, 5.7)  | -6.8 (-11.0, -2.5) |      |
| T3                            | 0.7 (-2.3, 3.7)  | 0.7 (-3.4, 4.7)  | 0.3 (-4.2, 4.8)    |      |
| <b>ΣDEHP</b>                  |                  |                  |                    |      |
| T1                            | Reference        | Reference        | Reference          | 0.70 |
| T2                            | -1.7 (-4.8, 1.4) | -0.6 (-5.0, 3.8) | -2.6 (-7.3, 2.0)   |      |
| T3                            | 0.9 (-2.0, 3.8)  | 1.5 (-2.6, 5.6)  | 0.6 (-3.6, 4.8)    |      |
| <b>Depression Scale</b>       |                  |                  |                    |      |
| <b>ΣLMW</b>                   |                  |                  |                    |      |
| T1                            | Reference        | Reference        | Reference          | 0.21 |
| T2                            | 0.8 (-1.9, 3.5)  | 0.3 (-3.3, 3.9)  | 2.0 (-1.9, 5.8)    |      |
| T3                            | 1.4 (-1.3, 4.0)  | 0.1 (-3.6, 3.7)  | 3.3 (-1.0, 7.6)    |      |
| <b>ΣHMW</b>                   |                  |                  |                    |      |
| T1                            | Reference        | Reference        | Reference          | 0.78 |
| T2                            | 0.3 (-2.5, 3.0)  | 0.0 (-3.6, 3.5)  | 0.2 (-4.0, 4.4)    |      |
| T3                            | 0.8 (-2.0, 3.7)  | -0.2 (-4.0, 3.6) | 1.1 (-3.2, 5.4)    |      |
| <b>ΣDEHP</b>                  |                  |                  |                    |      |
| T1                            | Reference        | Reference        | Reference          | 0.75 |

|                                                                                                                                                                                                                                                                                                                                                                                                                                                                                                                                                                                                                                                                                         |                  |                  |                  |      |
|-----------------------------------------------------------------------------------------------------------------------------------------------------------------------------------------------------------------------------------------------------------------------------------------------------------------------------------------------------------------------------------------------------------------------------------------------------------------------------------------------------------------------------------------------------------------------------------------------------------------------------------------------------------------------------------------|------------------|------------------|------------------|------|
| T2                                                                                                                                                                                                                                                                                                                                                                                                                                                                                                                                                                                                                                                                                      | 1.4 (-1.6, 4.3)  | 1.2 (-2.6, 5.0)  | 1.3 (-3.2, 5.9)  |      |
| T3                                                                                                                                                                                                                                                                                                                                                                                                                                                                                                                                                                                                                                                                                      | 0.7 (-2.2, 3.5)  | -0.6 (-4.4, 3.3) | 1.2 (-3.2, 5.6)  |      |
| <b>Anxiety Scale</b>                                                                                                                                                                                                                                                                                                                                                                                                                                                                                                                                                                                                                                                                    |                  |                  |                  |      |
| ΣLMW                                                                                                                                                                                                                                                                                                                                                                                                                                                                                                                                                                                                                                                                                    |                  |                  |                  |      |
| T1                                                                                                                                                                                                                                                                                                                                                                                                                                                                                                                                                                                                                                                                                      | Reference        | Reference        | Reference        | 0.28 |
| T2                                                                                                                                                                                                                                                                                                                                                                                                                                                                                                                                                                                                                                                                                      | 0.3 (-2.0, 2.5)  | -0.1 (-3.7, 3.6) | 0.6 (-2.5, 3.7)  |      |
| T3                                                                                                                                                                                                                                                                                                                                                                                                                                                                                                                                                                                                                                                                                      | 1.9 (-0.6, 4.5)  | 0.7 (-3.1, 4.5)  | 3.1 (-0.4, 6.7)  |      |
| ΣHMW                                                                                                                                                                                                                                                                                                                                                                                                                                                                                                                                                                                                                                                                                    |                  |                  |                  |      |
| T1                                                                                                                                                                                                                                                                                                                                                                                                                                                                                                                                                                                                                                                                                      | Reference        | Reference        | Reference        | 0.81 |
| T2                                                                                                                                                                                                                                                                                                                                                                                                                                                                                                                                                                                                                                                                                      | -0.1 (-2.6, 2.4) | -0.6 (-4.6, 3.4) | 0.4 (-3.1, 3.9)  |      |
| T3                                                                                                                                                                                                                                                                                                                                                                                                                                                                                                                                                                                                                                                                                      | 0.4 (-2.0, 2.9)  | -0.6 (-4.9, 3.7) | 0.9 (-2.6, 4.4)  |      |
| ΣDEHP                                                                                                                                                                                                                                                                                                                                                                                                                                                                                                                                                                                                                                                                                   |                  |                  |                  |      |
| T1                                                                                                                                                                                                                                                                                                                                                                                                                                                                                                                                                                                                                                                                                      | Reference        | Reference        | Reference        | 0.95 |
| T2                                                                                                                                                                                                                                                                                                                                                                                                                                                                                                                                                                                                                                                                                      | 0.2 (-2.4, 2.8)  | -0.6 (-4.6, 3.4) | 1.0 (-2.7, 4.6)  |      |
| T3                                                                                                                                                                                                                                                                                                                                                                                                                                                                                                                                                                                                                                                                                      | 0.7 (-1.8, 3.2)  | -0.3 (-4.5, 3.9) | 1.1 (-2.5, 4.6)  |      |
| <b>Attention problems</b>                                                                                                                                                                                                                                                                                                                                                                                                                                                                                                                                                                                                                                                               |                  |                  |                  |      |
| ΣLMW                                                                                                                                                                                                                                                                                                                                                                                                                                                                                                                                                                                                                                                                                    |                  |                  |                  |      |
| T1                                                                                                                                                                                                                                                                                                                                                                                                                                                                                                                                                                                                                                                                                      | Reference        | Reference        | Reference        | 0.79 |
| T2                                                                                                                                                                                                                                                                                                                                                                                                                                                                                                                                                                                                                                                                                      | -1.6 (-4.2, 1.0) | -2.7 (-6.8, 1.5) | 0.2 (-3.2, 3.6)  |      |
| T3                                                                                                                                                                                                                                                                                                                                                                                                                                                                                                                                                                                                                                                                                      | -0.1 (-2.8, 2.6) | 0.7 (-3.3, 4.7)  | -0.5 (-4.2, 3.2) |      |
| ΣHMW                                                                                                                                                                                                                                                                                                                                                                                                                                                                                                                                                                                                                                                                                    |                  |                  |                  |      |
| T1                                                                                                                                                                                                                                                                                                                                                                                                                                                                                                                                                                                                                                                                                      | Reference        | Reference        | Reference        | 0.99 |
| T2                                                                                                                                                                                                                                                                                                                                                                                                                                                                                                                                                                                                                                                                                      | 1.1 (-1.6, 3.9)  | 1.8 (-2.6, 6.3)  | 0.3 (-3.3, 3.9)  |      |
| T3                                                                                                                                                                                                                                                                                                                                                                                                                                                                                                                                                                                                                                                                                      | 0.1 (-2.5, 2.7)  | 1.1 (-2.7, 5.0)  | -0.3 (-3.9, 3.4) |      |
| ΣDEHP                                                                                                                                                                                                                                                                                                                                                                                                                                                                                                                                                                                                                                                                                   |                  |                  |                  |      |
| T1                                                                                                                                                                                                                                                                                                                                                                                                                                                                                                                                                                                                                                                                                      | Reference        | Reference        | Reference        | 0.69 |
| T2                                                                                                                                                                                                                                                                                                                                                                                                                                                                                                                                                                                                                                                                                      | 2.4 (-0.4, 5.1)  | 2.1 (-2.3, 6.6)  | 2.6 (-0.9, 6.1)  |      |
| T3                                                                                                                                                                                                                                                                                                                                                                                                                                                                                                                                                                                                                                                                                      | -0.4 (-2.9, 2.2) | -0.4 (-4.4, 3.6) | 0.1 (-3.4, 3.7)  |      |
| <b>Hyperactivity</b>                                                                                                                                                                                                                                                                                                                                                                                                                                                                                                                                                                                                                                                                    |                  |                  |                  |      |
| ΣLMW                                                                                                                                                                                                                                                                                                                                                                                                                                                                                                                                                                                                                                                                                    |                  |                  |                  |      |
| T1                                                                                                                                                                                                                                                                                                                                                                                                                                                                                                                                                                                                                                                                                      | Reference        | Reference        | Reference        | 0.86 |
| T2                                                                                                                                                                                                                                                                                                                                                                                                                                                                                                                                                                                                                                                                                      | -0.3 (-3.0, 2.3) | 0.6 (-3.8, 5.0)  | -0.6 (-4.1, 3.0) |      |
| T3                                                                                                                                                                                                                                                                                                                                                                                                                                                                                                                                                                                                                                                                                      | 0.8 (-1.7, 3.4)  | 0.7 (-3.2, 4.6)  | 0.9 (-2.6, 4.5)  |      |
| ΣHMW                                                                                                                                                                                                                                                                                                                                                                                                                                                                                                                                                                                                                                                                                    |                  |                  |                  |      |
| T1                                                                                                                                                                                                                                                                                                                                                                                                                                                                                                                                                                                                                                                                                      | Reference        | Reference        | Reference        | 0.48 |
| T2                                                                                                                                                                                                                                                                                                                                                                                                                                                                                                                                                                                                                                                                                      | 0.7 (-2.1, 3.5)  | 1.6 (-2.8, 6.1)  | -0.2 (-4.0, 3.6) |      |
| T3                                                                                                                                                                                                                                                                                                                                                                                                                                                                                                                                                                                                                                                                                      | 1.0 (-1.6, 3.7)  | 2.4 (-1.9, 6.7)  | -0.2 (-3.9, 3.5) |      |
| ΣDEHP                                                                                                                                                                                                                                                                                                                                                                                                                                                                                                                                                                                                                                                                                   |                  |                  |                  |      |
| T1                                                                                                                                                                                                                                                                                                                                                                                                                                                                                                                                                                                                                                                                                      | Reference        | Reference        | Reference        | 0.74 |
| T2                                                                                                                                                                                                                                                                                                                                                                                                                                                                                                                                                                                                                                                                                      | 1.1 (-1.8, 3.9)  | 1.7 (-3.0, 6.3)  | 0.7 (-3.0, 4.5)  |      |
| T3                                                                                                                                                                                                                                                                                                                                                                                                                                                                                                                                                                                                                                                                                      | 0.4 (-2.0, 2.9)  | 0.7 (-3.4, 4.7)  | -0.2 (-3.8, 3.4) |      |
| <p><i>Abbreviations:</i> T1, Tertile 1; T2, Tertile 2; T3, Tertile 3; BASC-2, Behavior Assessment System for Children, 2nd edition; MEP, monoethyl phthalate; MBP, mono-n-butyl phthalate; MiBP, mono-isobutyl phthalate; MBzP, monobenzyl phthalate; MCP, mono(3-carboxypropyl) phthalate; MCOP, mono(carboxyooctyl) phthalate; MCNP, mono(carboxynonyl) phthalate; ΣDEHP, sum of di(2-ethylhexyl) phthalate metabolites; MEHP, mono(2-ethylhexyl) phthalate; MEHHP, mono(2-ethyl-5-hydroxyhexyl) phthalate; MEOHP, mono(2-ethyl-5-oxohexyl) phthalate; MECCP, mono(2-ethyl-5-carboxypentyl) phthalate; ΣHMW, sum of metabolites of high-molecular weight phthalates; ΣLMW, sum of</p> |                  |                  |                  |      |

metabolites of low-molecular weight phthalates.

Models were adjusted for maternal age at enrollment, education, country of birth, years in the U.S., depression at time of assessment; child sex, child age at time of assessment, language of assessment, HOME score, and household income at time of assessment.

<sup>a</sup>Separate models created for each phthalate metabolite or sum of metabolites ( $\Sigma$ DEHP,  $\Sigma$ HMW,  $\Sigma$ LMW).

<sup>b</sup>Units are ng/mL for all individual metabolites and nmol/mL for the sums of metabolites ( $\Sigma$ DEHP,  $\Sigma$ HMW,  $\Sigma$ LMW).

<sup>c</sup>Higher scores indicate more symptomatic behavior.

<sup>d</sup>Number of children with parent-report internalizing problems, externalizing problems, hyperactivity, and attention problems data = 328, with parent-report depression scale data = 322, with parent-report anxiety scale data = 313, with teacher-report data = 265, with self-report internalizing problems = 276, with self-report depression scale data = 317, with self-report anxiety scale data = 316, with self-report hyperactivity and attention problems scale data = 315.

<sup>e</sup>Number of boys with parent-report internalizing problems, externalizing problems, hyperactivity, and attention problems data = 158, with parent-report depression scale data = 153, with parent-report anxiety scale data = 150, with teacher-report data = 123, with self-report internalizing problems = 128, with self-report depression scale data = 151, with self-report anxiety scale, hyperactivity, and attention problems scale data = 150.

<sup>f</sup>Number of girls with parent-report internalizing problems, externalizing problems, hyperactivity, and attention problems data = 170, with parent-report depression scale data = 169 with parent-report anxiety scale data = 163, with teacher-report data = 142, with self-report internalizing problems = 128, with self-report depression scale and anxiety scale data = 166, with self-report hyperactivity and attention problems scale data = 165.

**Table S11.** Adjusted associations [ $\beta$  (95% CI)] of prenatal urinary phthalate biomarker concentrations (specific gravity-adjusted)<sup>a,b</sup> categorized in tertiles with **CPT-II behavioral outcomes<sup>c</sup> at 9 and/or 12 years** using GEE models for all children and stratified by child sex, CHAMACOS.

|                                                                                                                                                                                                                                                                   | All children <sup>c</sup> | Boys <sup>d</sup> | Girls <sup>e</sup> | p-int |
|-------------------------------------------------------------------------------------------------------------------------------------------------------------------------------------------------------------------------------------------------------------------|---------------------------|-------------------|--------------------|-------|
| <b>Errors of omission</b>                                                                                                                                                                                                                                         |                           |                   |                    |       |
| $\Sigma$ LMW                                                                                                                                                                                                                                                      |                           |                   |                    |       |
| T1                                                                                                                                                                                                                                                                | Reference                 | Reference         | Reference          | 0.80  |
| T2                                                                                                                                                                                                                                                                | -1.5 (-4.0, 1.1)          | -2.2 (-6.1, 1.8)  | -0.4 (-4.1, 3.2)   |       |
| T3                                                                                                                                                                                                                                                                | 2.6 (-0.6, 5.9)           | 2.7 (-2.5, 7.9)   | 3.4 (-1.3, 8.1)    |       |
| $\Sigma$ HMW                                                                                                                                                                                                                                                      |                           |                   |                    |       |
| T1                                                                                                                                                                                                                                                                | Reference                 | Reference         | Reference          | 0.11  |
| T2                                                                                                                                                                                                                                                                | -1.8 (-4.7, 1.2)          | -2.3 (-6.3, 1.7)  | -1.1 (-5.5, 3.4)   |       |
| T3                                                                                                                                                                                                                                                                | -0.5 (-3.4, 2.5)          | 3.7 (-1.3, 8.7)   | -2.7 (-6.6, 1.2)   |       |
| $\Sigma$ DEHP                                                                                                                                                                                                                                                     |                           |                   |                    |       |
| T1                                                                                                                                                                                                                                                                | Reference                 | Reference         | Reference          | 0.3   |
| T2                                                                                                                                                                                                                                                                | -1.7 (-4.6, 1.3)          | -2.6 (-6.7, 1.6)  | -0.8 (-5.2, 3.5)   |       |
| T3                                                                                                                                                                                                                                                                | -1.1 (-4.1, 1.8)          | 1.3 (-3.6, 6.2)   | -2.7 (-6.6, 1.3)   |       |
| <b>Errors of commission</b>                                                                                                                                                                                                                                       |                           |                   |                    |       |
| $\Sigma$ LMW                                                                                                                                                                                                                                                      |                           |                   |                    |       |
| T1                                                                                                                                                                                                                                                                | Reference                 | Reference         | Reference          | 0.96  |
| T2                                                                                                                                                                                                                                                                | -0.4 (-2.5, 1.8)          | 0.5 (-3.0, 4.0)   | -1.0 (-3.8, 1.8)   |       |
| T3                                                                                                                                                                                                                                                                | 1.3 (-0.7, 3.3)           | 1.3 (-1.9, 4.5)   | 1.4 (-1.5, 4.2)    |       |
| $\Sigma$ HMW                                                                                                                                                                                                                                                      |                           |                   |                    |       |
| T1                                                                                                                                                                                                                                                                | Reference                 | Reference         | Reference          | 0.92  |
| T2                                                                                                                                                                                                                                                                | -1.3 (-3.6, 0.9)          | -2.2 (-5.7, 1.3)  | -1.0 (-4.0, 2.0)   |       |
| T3                                                                                                                                                                                                                                                                | 0.2 (-1.9, 2.3)           | 0.6 (-3.0, 4.2)   | -0.2 (-3.0, 2.6)   |       |
| $\Sigma$ DEHP                                                                                                                                                                                                                                                     |                           |                   |                    |       |
| T1                                                                                                                                                                                                                                                                | Reference                 | Reference         | Reference          | 0.47  |
| T2                                                                                                                                                                                                                                                                | -1.0 (-3.2, 1.2)          | -1.4 (-4.8, 2.1)  | -1.1 (-4.0, 1.8)   |       |
| T3                                                                                                                                                                                                                                                                | -0.5 (-2.6, 1.6)          | -1.7 (-5.1, 1.8)  | 0.0 (-2.8, 2.9)    |       |
| <b>ADHD Confidence Index</b>                                                                                                                                                                                                                                      |                           |                   |                    |       |
| $\Sigma$ LMW                                                                                                                                                                                                                                                      |                           |                   |                    |       |
| T1                                                                                                                                                                                                                                                                | Reference                 | Reference         | Reference          | 0.24  |
| T2                                                                                                                                                                                                                                                                | 0.6 (-3.1, 4.3)           | -4.6 (-10.2, 1.1) | 4.9 (-0.3, 10.0)   |       |
| T3                                                                                                                                                                                                                                                                | 2.9 (-1.2, 7.0)           | 0.6 (-5.3, 6.4)   | 5.6 (-0.4, 11.7)   |       |
| $\Sigma$ HMW                                                                                                                                                                                                                                                      |                           |                   |                    |       |
| T1                                                                                                                                                                                                                                                                | Reference                 | Reference         | Reference          | 0.16  |
| T2                                                                                                                                                                                                                                                                | 2.6 (-1.4, 6.6)           | -1.0 (-6.9, 5.0)  | -3.3 (-9.1, 2.5)   |       |
| T3                                                                                                                                                                                                                                                                | -1.6 (-5.5, 2.4)          | 1.7 (-4.3, 7.7)   | -4.3 (-9.9, 1.3)   |       |
| $\Sigma$ DEHP                                                                                                                                                                                                                                                     |                           |                   |                    |       |
| T1                                                                                                                                                                                                                                                                | Reference                 | Reference         | Reference          | 0.47  |
| T2                                                                                                                                                                                                                                                                | -1.7 (-5.6, 2.3)          | -3.6 (-9.6, 2.5)  | -0.5 (-6.2, 5.1)   |       |
| T3                                                                                                                                                                                                                                                                | -2.2 (-6.2, 1.7)          | -1.2 (-7.2, 4.8)  | -3.9 (-9.6, 1.8)   |       |
| <i>Abbreviations:</i> T1, Tertile 1; T2, Tertile 2; T3, Tertile 3; CPT-II, Continuous Performance Test, 2nd edition; MEP, monoethyl phthalate; MBP, mono-n-butyl phthalate; MiBP, mono-isobutyl phthalate; MBzP, monobenzyl phthalate; MCP, mono(3-carboxypropyl) |                           |                   |                    |       |

phthalate; MCOP, mono(carboxyooctyl) phthalate; MCNP, mono(carboxynonyl) phthalate;  $\Sigma$ DEHP, sum of di(2-ethylhexyl) phthalate metabolites; MEHP, mono(2-ethylhexyl) phthalate; MEHHP, mono(2-ethyl-5-hydroxyhexyl) phthalate; MEOHP, mono(2-ethyl-5-oxohexyl) phthalate; MECCP, mono(2-ethyl-5-carboxypentyl) phthalate;  $\Sigma$ HMW, sum of metabolites of high-molecular weight phthalates;  $\Sigma$ LMW, sum of metabolites of low-molecular weight phthalates.

Models were adjusted for maternal age at enrollment, education, country of birth, years in the U.S., depression at time of assessment; child sex, child age at time of assessment, language of assessment, HOME score, and household income at time of assessment.

<sup>a</sup>Separate models created for each phthalate metabolite or sum of metabolites ( $\Sigma$ DEHP,  $\Sigma$ HMW,  $\Sigma$ LMW).

<sup>b</sup>Units are ng/mL for all individual metabolites and nmol/mL for the sums of metabolites ( $\Sigma$ DEHP,  $\Sigma$ HMW,  $\Sigma$ LMW).

<sup>c</sup>Higher scores indicate more symptomatic behavior.

<sup>d</sup>Number of children with data = 317.

<sup>e</sup>Number of boys with data = 151.

<sup>f</sup>Number of girls with data = 166.



**Table S12.** Adjusted associations [ $\beta$  (95% CI)] of prenatal urinary phthalate biomarker concentrations (nmol/mL; log<sub>2</sub>-transformed and specific gravity-adjusted)<sup>a</sup> with executive function and cognition outcomes at 7, 9, 10.5, 12, 14, and/or 16 years using GEE models stratified by sex, CHAMACOS.

| Outcomes                                 | Orientation <sup>b</sup> | $\Sigma$ LMW     |                  |       | $\Sigma$ HMW     |                 |       | $\Sigma$ DEHP    |                 |       |
|------------------------------------------|--------------------------|------------------|------------------|-------|------------------|-----------------|-------|------------------|-----------------|-------|
|                                          |                          | Boys             | Girls            | p-int | Boys             | Girls           | p-int | Boys             | Girls           | p-int |
| <i>Executive function</i>                |                          |                  |                  |       |                  |                 |       |                  |                 |       |
| WCST ( <i>T</i> -score)                  |                          |                  |                  |       |                  |                 |       |                  |                 |       |
| Errors <sup>c</sup>                      | (-)                      | 0.4 (-0.5, 1.4)  | -0.2 (-0.9, 0.6) | 0.23  | 0.7 (-0.7, 2.0)  | 0.4 (-0.8, 1.6) | 0.74  | 0.6 (-0.7, 1.8)  | 0.4 (-0.7, 1.6) | 0.87  |
| Perseverative Errors <sup>c</sup>        | (-)                      | 1.4 (0.3, 2.5)   | 0.1 (-0.9, 1.1)  | 0.08  | 0.9 (-1.0, 2.7)  | 0.8 (-0.9, 2.4) | 0.86  | 0.9 (-0.9, 2.6)  | 0.6 (-0.9, 2.2) | 0.80  |
| BRIEF – parent report ( <i>T</i> -score) |                          |                  |                  |       |                  |                 |       |                  |                 |       |
| Behavioral regulation Index <sup>d</sup> | (+)                      | 0.3 (-0.6, 1.1)  | 0.0 (-0.7, 0.6)  | 0.56  | -0.1 (-1.6, 1.5) | 0.3 (-0.9, 1.5) | 0.78  | -0.4 (-1.8, 1.0) | 0.3 (-0.8, 1.4) | 0.47  |
| Metacognition Index <sup>e</sup>         | (+)                      | -0.3 (-1.0, 0.5) | -0.4 (-1.1, 0.2) | 0.66  | -0.2 (-1.5, 1.0) | 0.2 (-1.1, 1.6) | 0.71  | -0.5 (-1.7, 0.6) | 0.3 (-0.9, 1.5) | 0.39  |
| Global Executive Composite <sup>d</sup>  | (+)                      | -0.1 (-0.9, 0.7) | -0.3 (-1.0, 0.4) | 0.62  | -0.1 (-1.5, 1.3) | 0.3 (-1.0, 1.5) | 0.77  | -0.5 (-1.8, 0.8) | 0.3 (-0.8, 1.5) | 0.43  |
| NEPSY Tower <sup>f</sup>                 | (-)                      | 0.0 (-0.3, 0.3)  | 0.2 (-0.1, 0.5)  | 0.35  | 0.1 (-0.5, 0.6)  | 0.2 (-0.2, 0.5) | 0.72  | 0.0 (-0.5, 0.5)  | 0.1 (-0.2, 0.5) | 0.69  |
| <i>Cognition</i>                         |                          |                  |                  |       |                  |                 |       |                  |                 |       |
| WISC-IV <sup>g</sup>                     |                          |                  |                  |       |                  |                 |       |                  |                 |       |
| FSIQ <sup>h</sup>                        | (-)                      | -0.3 (-1.5, 0.9) | -0.1 (-1.2, 0.9) | 0.89  | -1.9 (-4.1, 0.3) | 1.8 (0.1, 3.4)  | 0.01  | -1.7 (-3.8, 0.3) | 1.6 (0.0, 3.2)  | 0.01  |
| VCIQ <sup>i</sup>                        | (-)                      | -0.4 (-1.6, 0.9) | -0.4 (-1.4, 0.5) | 0.92  | -1.0 (-3.3, 1.4) | 0.6 (-0.8, 2.0) | 0.26  | -0.8 (-3.1, 1.4) | 0.5 (-0.8, 1.8) | 0.30  |
| PRIQ <sup>i</sup>                        | (-)                      | 0.4 (-1.0, 1.7)  | 0.2 (-1.1, 1.6)  | 0.89  | -1.4 (-3.5, 0.7) | 1.7 (-0.5, 3.9) | 0.04  | -1.4 (-3.3, 0.4) | 1.4 (-0.6, 3.5) | 0.04  |
| WMIQ <sup>j</sup>                        | (-)                      | -1.0 (-2.0, 0.0) | -0.3 (-1.4, 0.8) | 0.37  | -2.1 (-4.2, 0.0) | 1.8 (0.1, 3.4)  | <0.01 | -1.9 (-3.9, 0.1) | 1.6 (0.1, 3.2)  | <0.01 |
| PSIQ <sup>j</sup>                        | (-)                      | 0.1 (-1.0, 1.1)  | 0.3 (-0.6, 1.2)  | 0.68  | -0.8 (-2.9, 1.2) | 1.5 (0.2, 2.9)  | 0.06  | -0.8 (-2.7, 1.1) | 1.5 (0.1, 2.8)  | 0.05  |

*Abbreviations:* WCST, Wisconsin Card Sort Task-64: Computer Version 2 – Research Edition; BRIEF, Behavior Rating Inventory Executive Function; WISC-IV, Wechsler Intelligence Scale for Children 4th edition; VCIQ, verbal comprehension IQ; PRIQ, perceptual reasoning IQ; WMIQ, working memory IQ; PSIQ, processing speed IQ;  $\Sigma$ LMW, sum of metabolites of low-molecular weight phthalates;  $\Sigma$ HMW, sum of metabolites of high-molecular weight phthalates;  $\Sigma$ DEHP, sum of di-2-ethylhexyl phthalate metabolites.

Models were adjusted for maternal age at enrollment, education, country of birth, years in the U.S., depression at time of assessment; child sex, child age at time of assessment, language of assessment, HOME score, and household income at time of assessment. WCST models were also adjusted for children’s video game usage.

<sup>a</sup> Separate models created for each sum of metabolites ( $\Sigma$ DEHP,  $\Sigma$ HMW,  $\Sigma$ LMW).

<sup>b</sup> (+) Higher scores indicate poorer performance/more symptomatic behavior; (-) Lower scores indicate poorer performance/more symptomatic behavior.

<sup>c</sup> Number of children with data = 318 (152 boys and 166 girls).

<sup>d</sup> Number of children with data = 331 (159 boys and 172 girls).

<sup>e</sup> Number of children with data = 330 (158 boys and 172 girls).

<sup>f</sup> Number of children with data = 313 (148 boys and 165 girls).

<sup>g</sup> Data presented in Figure 1.

<sup>h</sup> Number of children with data = 321 (154 boys and 167 girls).

<sup>i</sup> Number of children with data = 324 (157 boys and 167 girls).

<sup>j</sup> Number of children with data = 323 (156 boys and 167 girls)

**Table S13.** Adjusted associations [ $\beta$  (95% CI)] of individual prenatal urinary phthalate biomarker concentrations (ng/mL; log<sub>2</sub>-transformed and specific gravity-adjusted)<sup>a</sup> with executive function and cognition outcomes at 7, 9, 10.5, 12, 14, and/or 16 years using GEE models, CHAMACOS.

| Outcome                                  | MEP              | MBP              | MiBP             | MBzP             | MCPP             | MCOP             | MCNP             | MEHP             | MEHHP            | MECPP            | MEOHP            |
|------------------------------------------|------------------|------------------|------------------|------------------|------------------|------------------|------------------|------------------|------------------|------------------|------------------|
| <i>Executive function</i>                |                  |                  |                  |                  |                  |                  |                  |                  |                  |                  |                  |
| WCST ( <i>T</i> -score)                  |                  |                  |                  |                  |                  |                  |                  |                  |                  |                  |                  |
| Errors <sup>b</sup>                      | 0.1 (-0.4, 0.7)  | 0.2 (-0.6, 1.0)  | 0.0 (-0.6, 0.6)  | 0.0 (-0.8, 0.7)  | 0.2 (-0.5, 1.0)  | 0.3 (-0.6, 1.1)  | 0.6 (-0.3, 1.4)  | 0.3 (-0.4, 1.0)  | 0.2 (-0.6, 1.0)  | 0.8 (-0.1, 1.6)  | 0.4 (-0.4, 1.1)  |
| Perseverative Errors <sup>b</sup>        | 0.5 (-0.2, 1.2)  | 0.6 (-0.4, 1.6)  | 0.1 (-0.6, 0.9)  | 0.1 (-0.7, 1.1)  | 0.3 (-0.6, 1.3)  | 0.5 (-0.7, 1.8)  | 0.7 (-0.5, 1.9)  | 0.3 (-0.6, 1.2)  | 0.4 (-0.7, 1.4)  | 0.9 (-0.3, 2.0)  | 0.5 (-0.6, 1.5)  |
| BRIEF – parent report ( <i>T</i> -score) |                  |                  |                  |                  |                  |                  |                  |                  |                  |                  |                  |
| Behavioral regulation Index <sup>c</sup> | 0.1 (-0.4, 0.6)  | 0.0 (-0.8, 0.8)  | 0.0 (-0.6, 0.6)  | 0.6 (-0.2, 1.3)  | 0.1 (-0.7, 0.8)  | 0.3 (-0.7, 1.4)  | -0.4 (-1.3, 0.4) | 0.2 (-0.5, 0.9)  | 0.0 (-0.8, 0.8)  | -0.1 (-0.9, 0.8) | -0.1 (-0.9, 0.7) |
| Metacognition Index <sup>d</sup>         | -0.4 (-0.8, 0.1) | -0.3 (-1.0, 0.5) | -0.2 (-0.8, 0.5) | 0.2 (-0.6, 0.9)  | -0.2 (-0.9, 0.5) | 0.5 (-0.5, 1.4)  | -0.3 (-1.1, 0.6) | 0.1 (-0.6, 0.8)  | -0.2 (-1.0, 0.6) | -0.1 (-1.0, 0.8) | -0.2 (-1.0, 0.6) |
| Global Executive Composite <sup>e</sup>  | -0.2 (-0.7, 0.3) | -0.2 (-0.9, 0.6) | -0.1 (-0.8, 0.5) | 0.4 (-0.4, 1.1)  | -0.1 (-0.8, 0.7) | 0.4 (-0.6, 1.4)  | -0.4 (-1.2, 0.5) | 0.2 (-0.5, 0.9)  | -0.1 (-0.9, 0.7) | -0.1 (-1.0, 0.8) | -0.1 (-1.0, 0.6) |
| NEPSY Tower                              | 0.1 (-0.1, 0.3)  | 0.3 (0.1, 0.6)   | 0.1 (-0.1, 0.3)  | 0.2 (0.0, 0.4)   | 0.2 (0.0, 0.5)   | 0.2 (-0.1, 0.5)  | 0.2 (-0.1, 0.6)  | 0.1 (-0.1, 0.3)  | 0.1 (-0.2, 0.3)  | 0.0 (-0.3, 0.3)  | 0.1 (-0.1, 0.4)  |
| <i>Cognition</i>                         |                  |                  |                  |                  |                  |                  |                  |                  |                  |                  |                  |
| WISC-IV (scaled score)                   |                  |                  |                  |                  |                  |                  |                  |                  |                  |                  |                  |
| FSIQ <sup>f</sup>                        | -0.3 (-1.0, 0.4) | 0.1 (-0.8, 1.1)  | 0.2 (-0.7, 1.0)  | -0.2 (-1.1, 0.7) | 0.4 (-0.7, 1.5)  | 0.1 (-1.0, 1.3)  | 0.6 (-0.7, 2.0)  | 0.0 (-1.1, 1.0)  | 0.0 (-1.2, 1.2)  | 0.1 (-1.2, 1.5)  | -0.1 (-1.2, 1.1) |
| VCIQ <sup>g</sup>                        | -0.4 (-1.1, 0.3) | 0.2 (-0.6, 1.1)  | 0.0 (-0.7, 0.7)  | -0.2 (-1.2, 0.6) | 0.5 (-0.5, 1.6)  | -0.2 (-1.2, 0.8) | 0.5 (-0.5, 1.6)  | -0.1 (-1.0, 0.9) | -0.1 (-1.2, 1.1) | -0.4 (-1.6, 0.9) | -0.3 (-1.4, 0.8) |
| PRIQ <sup>g</sup>                        | 0.1 (-0.8, 1.0)  | 0.3 (-0.9, 1.5)  | 0.3 (-0.7, 1.3)  | 0.1 (-1.0, 1.2)  | 0.6 (-0.7, 1.9)  | 0.9 (-0.6, 2.3)  | 0.8 (-0.9, 2.5)  | 0.2 (-1.0, 1.3)  | 0.1 (-1.2, 1.4)  | 0.4 (-1.0, 1.9)  | 0.2 (-1.1, 1.5)  |
| WMIQ <sup>h</sup>                        | -0.6 (-1.3, 0.1) | -0.5 (-1.5, 0.4) | -0.4 (-1.2, 0.4) | -0.5 (-1.4, 0.4) | 0.2 (-0.9, 1.3)  | -0.2 (-1.3, 0.9) | 0.2 (-1.1, 1.6)  | -0.2 (-1.2, 0.8) | -0.1 (-1.3, 1.1) | 0.1 (-1.2, 1.5)  | -0.2 (-1.4, 1.0) |
| PSIQ <sup>h</sup>                        | 0.1 (-0.5, 0.8)  | 0.6 (-0.3, 1.5)  | 0.9 (0.0, 1.8)   | 0.4 (-0.4, 1.2)  | 0.1 (-0.7, 1.0)  | 0.7 (-0.5, 1.9)  | 0.8 (-0.4, 2.0)  | 0.1 (-0.9, 1.1)  | 0.4 (-0.6, 1.4)  | 0.7 (-0.5, 1.9)  | 0.4 (-0.7, 1.4)  |

*Abbreviations:* WCST, Wisconsin Card Sort Task-64: Computer Version 2 – Research Edition; BRIEF, Behavior Rating Inventory Executive Function; WISC-IV, Wechsler Intelligence Scale for Children 4th edition; VCIQ, verbal comprehension IQ; PRIQ, perceptual reasoning IQ; WMIQ, working memory IQ; PSIQ, processing speed IQ; MEP, monoethyl phthalate; MBP, mono-n-butyl phthalate; MiBP, mono-isobutyl phthalate; MBzP, monobenzyl phthalate; MCPP, mono(3-carboxypropyl) phthalate; MCOP, mono(carboxyoctyl) phthalate; MCNP, mono(carboxynonyl) phthalate; MEHP, mono(2-ethylhexyl) phthalate; MEHHP, mono(2-ethyl-5-hydroxyhexyl) phthalate; MEOHP, mono(2-ethyl-5-oxohexyl) phthalate; MECCP, mono(2-ethyl-5-carboxypentyl) phthalate

Models were adjusted for maternal age at enrollment, education, country of birth, years in the U.S., depression at time of assessment; child sex, child age at time of assessment, language of assessment, HOME score, and household income at time of assessment. WCST models were also adjusted for children’s video game usage.

<sup>a</sup> Separate models created for each phthalate metabolite

<sup>b</sup> Number of children with data = 318 (152 boys and 166 girls).

<sup>c</sup> Number of children with data = 331 (159 boys and 172 girls).

<sup>d</sup> Number of children with data = 330 (158 boys and 172 girls).

<sup>e</sup> Number of children with data = 313 (148 boys and 165 girls).

<sup>f</sup> Number of children with data = 321 (154 boys and 167 girls).

<sup>g</sup> Number of children with data = 324 (157 boys and 167 girls).

<sup>h</sup> Number of children with data = 323 (156 boys and 167 girls).

**Table S14.** Adjusted associations [ $\beta$  (95% CI)] of prenatal urinary phthalate biomarker concentrations (nmol/mL; log<sub>2</sub>-transformed and specific gravity-adjusted)<sup>a</sup> with social cognition and behavior outcomes at 7, 9, 10.5, 12, 14, and/or 16 years using GEE models stratified by sex, CHAMACOS.

| Outcomes                                       | Orientation <sup>b</sup> | ΣLMW             |                  |       | ΣHMW             |                  |       | ΣDEHP            |                  |       |
|------------------------------------------------|--------------------------|------------------|------------------|-------|------------------|------------------|-------|------------------|------------------|-------|
|                                                |                          | Boys             | Girls            | p-int | Boys             | Girls            | p-int | Boys             | Girls            | p-int |
| <i>Social Cognition</i> <sup>c</sup>           |                          |                  |                  |       |                  |                  |       |                  |                  |       |
| SRS Total Score <sup>d</sup>                   | (+)                      | 0.3 (-0.5, 1.2)  | 0.8 (-0.1, 1.6)  | 0.71  | 0.2 (-0.9, 1.3)  | -0.1 (-1.5, 1.3) | 0.76  | 0.1 (-0.9, 1.2)  | -0.1 (-1.4, 1.1) | 0.74  |
| ENI <sup>e</sup>                               | (-)                      | 0.0 (-0.1, 0.2)  | 0.1 (-0.1, 0.2)  | 0.67  | 0.0 (-0.2, 0.2)  | 0.2 (0.0, 0.4)   | 0.15  | 0.0 (-0.2, 0.2)  | 0.2 (0.0, 0.4)   | 0.10  |
| NEPSY-II Affect Recognition <sup>f</sup>       | (-)                      | -0.2 (-0.6, 0.3) | 0.0 (-0.3, 0.4)  | 0.46  | -0.1 (-0.7, 0.5) | -0.4 (-1.0, 0.2) | 0.57  | 0.0 (-0.6, 0.6)  | -0.3 (-0.9, 0.3) | 0.42  |
| <i>Behavior</i>                                |                          |                  |                  |       |                  |                  |       |                  |                  |       |
| BASC-2 – parent report (T-score)               |                          |                  |                  |       |                  |                  |       |                  |                  |       |
| Internalizing problems <sup>g</sup>            | (+)                      | 0.5 (-0.3, 1.3)  | 0.7 (0.0, 1.4)   | 0.76  | 0.7 (-0.9, 2.3)  | 0.8 (-0.3, 2.0)  | 0.91  | 0.4 (-1.1, 1.9)  | 0.7 (-0.3, 1.7)  | 0.75  |
| Depression scale <sup>c,h</sup>                | (+)                      | 0.4 (-0.5, 1.2)  | 0.6 (-0.2, 1.3)  | 0.74  | 0.6 (-1.0, 2.2)  | 0.6 (-0.5, 1.6)  | 0.99  | 0.2 (-1.3, 1.7)  | 0.5 (-0.4, 1.5)  | 0.70  |
| Anxiety scale <sup>c,i</sup>                   | (+)                      | 0.5 (-0.5, 1.4)  | 0.2 (-0.7, 1.0)  | 0.59  | 1.0 (-1.0, 2.9)  | 0.4 (-1.0, 1.8)  | 0.65  | 0.6 (-1.3, 2.5)  | 0.4 (-0.9, 1.8)  | 0.89  |
| Externalizing problems <sup>g</sup>            | (+)                      | -0.1 (-0.8, 0.6) | -0.1 (-0.7, 0.5) | 0.99  | -0.1 (-1.5, 1.2) | 0.5 (-0.5, 1.5)  | 0.46  | -0.4 (-1.6, 0.8) | 0.4 (-0.4, 1.3)  | 0.29  |
| Hyperactivity scale <sup>g</sup>               | (+)                      | -0.3 (-1.0, 0.4) | -0.1 (-0.6, 0.5) | 0.59  | -0.5 (-1.8, 0.7) | 0.4 (-0.5, 1.3)  | 0.22  | -0.7 (-1.8, 0.4) | 0.4 (-0.4, 1.1)  | 0.12  |
| Attention problems scale <sup>g</sup>          | (+)                      | 0.5 (-0.3, 1.3)  | -0.8 (-1.5, 0.0) | 0.03  | -0.4 (-1.9, 1.0) | -0.1 (-1.5, 1.3) | 0.75  | -0.4 (-1.8, 1.0) | 0.0 (-1.3, 1.2)  | 0.72  |
| BASC-2 – teacher-report (T-score) <sup>c</sup> |                          |                  |                  |       |                  |                  |       |                  |                  |       |
| Internalizing problems <sup>i</sup>            | (+)                      | -0.9 (-2.3, 0.5) | -0.8 (-2.0, 0.5) | 0.89  | -0.9 (-2.8, 1.0) | -0.8 (-3.0, 1.4) | 0.96  | -0.5 (-2.3, 1.2) | -0.8 (-2.9, 1.2) | 0.84  |
| Depression scale <sup>j</sup>                  | (+)                      | -0.4 (-1.5, 0.8) | -0.9 (-1.9, 0.1) | 0.45  | 0.3 (-1.8, 2.4)  | -1.0 (-2.6, 0.7) | 0.35  | 0.4 (-1.7, 2.4)  | -1.0 (-2.5, 0.6) | 0.30  |
| Anxiety scale <sup>j</sup>                     | (+)                      | -0.8 (-2.1, 0.5) | -1.0 (-2.4, 0.3) | 0.83  | -0.9 (-2.7, 0.8) | -1.1 (-3.4, 1.1) | 0.90  | -0.7 (-2.4, 1.0) | -1.1 (-3.2, 1.0) | 0.76  |
| Externalizing problems <sup>j</sup>            | (+)                      | 0.2 (-1.1, 1.5)  | -0.5 (-1.2, 0.1) | 0.33  | 0.2 (-1.7, 2.0)  | -0.4 (-1.7, 0.8) | 0.61  | 0.4 (-1.3, 2.1)  | -0.2 (-1.3, 0.9) | 0.55  |
| Hyperactivity                                  | (+)                      | 0.3 (-1.0, 1.6)  | -0.4 (-1.1, 0.3) | 0.37  | -0.2 (-2.2, 1.9) | -0.7 (-2.1, 0.7) | 0.69  | 0.1 (-1.9, 2.0)  | -0.5 (-1.8, 0.7) | 0.61  |

|                                              |     |                  |                  |      |                  |                  |      |                  |                  |      |
|----------------------------------------------|-----|------------------|------------------|------|------------------|------------------|------|------------------|------------------|------|
| scale <sup>j</sup>                           |     |                  |                  |      |                  |                  |      |                  |                  |      |
| Attention problems scale <sup>j</sup>        | (+) | -0.1 (-0.9, 0.8) | -0.5 (-1.3, 0.2) | 0.41 | -0.2 (-1.8, 1.3) | -0.9 (-2.2, 0.3) | 0.49 | 0.0 (-1.5, 1.5)  | -0.7 (-1.9, 0.5) | 0.47 |
| CADS – parent report (T-score)               |     |                  |                  |      |                  |                  |      |                  |                  |      |
| ADHD Index <sup>o</sup>                      | (+) | -0.3 (-0.8, 0.3) | -0.3 (-0.9, 0.3) | 0.94 | -0.4 (-1.4, 0.6) | 0.0 (-1.1, 1.1)  | 0.58 | -0.6 (-1.4, 0.4) | 0.1 (-0.9, 1.1)  | 0.36 |
| DSM-IV Total Scale <sup>o</sup>              | (+) | -0.3 (-0.9, 0.3) | -0.2 (-0.8, 0.4) | 0.81 | -0.4 (-1.4, 0.7) | 0.3 (-0.9, 1.5)  | 0.42 | -0.6 (-1.5, 0.3) | 0.3 (-0.8, 1.4)  | 0.21 |
| Inattentive Scale <sup>o</sup>               | (+) | -0.3 (-0.8, 0.3) | -0.3 (-0.8, 0.2) | 0.34 | -0.4 (-1.3, 0.4) | 0.0 (-1.0, 1.1)  | 0.49 | -0.6 (-1.4, 0.2) | 0.1 (-0.8, 1.1)  | 0.24 |
| Hyperactive/impulsive scale <sup>o</sup>     | (+) | -0.3 (-1.1, 0.4) | 0.0 (-0.7, 0.6)  | 0.53 | -0.3 (-1.5, 0.9) | 0.5 (-0.7, 1.8)  | 0.37 | -0.5 (-1.6, 0.5) | 0.5 (-0.7, 1.7)  | 0.21 |
| CADS – teacher-report (T-score) <sup>c</sup> |     |                  |                  |      |                  |                  |      |                  |                  |      |
| ADHD Index <sup>p</sup>                      | (+) | -0.1 (-1.3, 1.1) | -0.8 (-1.9, 0.4) | 0.43 | 0.5 (-1.8, 2.7)  | -1.5 (-3.5, 0.4) | 0.20 | 0.5 (-1.7, 2.7)  | -1.2 (-3.0, 0.6) | 0.22 |
| DSM-IV Total Scale <sup>q</sup>              | (+) | -0.1 (-1.1, 0.9) | -0.5 (-1.5, 0.5) | 0.57 | 0.6 (-1.4, 2.6)  | -1.1 (-2.7, 0.6) | 0.19 | 0.8 (-1.1, 2.6)  | -0.9 (-2.4, 0.6) | 0.18 |
| Inattentive Scale <sup>r</sup>               | (+) | -0.1 (-1.2, 1.0) | -0.4 (-1.2, 0.5) | 0.71 | 0.7 (-1.3, 2.6)  | -1.0 (-2.3, 0.3) | 0.15 | 0.8 (-1.0, 2.6)  | -0.9 (-2.0, 0.3) | 0.13 |
| Hyperactive/impulsive scale <sup>r</sup>     | (+) | 0.1 (-0.9, 1.2)  | -0.3 (-1.2, 0.6) | 0.52 | 0.6 (-1.3, 2.6)  | -0.6 (-2.2, 1.1) | 0.35 | 0.7 (-1.2, 2.6)  | -0.4 (-1.9, 1.1) | 0.36 |
| CPT-II (T-score)                             |     |                  |                  |      |                  |                  |      |                  |                  |      |
| Errors of omission <sup>s</sup>              | (+) | 1.2 (-0.3, 2.8)  | 0.8 (-0.3, 1.9)  | 0.65 | 1.4 (-0.6, 3.4)  | -1.1 (-2.6, 0.3) | 0.04 | 1.1 (-0.8, 2.9)  | -1.0 (-2.4, 0.4) | 0.07 |
| Errors of commission <sup>s</sup>            | (+) | 0.3 (-0.5, 1.2)  | 0.4 (-0.3, 1.2)  | 0.88 | -0.4 (-1.7, 0.9) | 0.1 (-1.2, 1.4)  | 0.61 | -0.7 (-1.9, 0.5) | 0.0 (-1.2, 1.2)  | 0.44 |
| ADHD confidence index <sup>s</sup>           | (+) | 0.4 (-1.2, 2.0)  | 1.1 (-0.8, 3.0)  | 0.60 | 0.1 (-2.6, 2.8)  | -2.2 (-4.6, 0.0) | 0.19 | -0.1 (-2.6, 2.4) | -2.1 (-4.3, 0.1) | 0.24 |

*Abbreviations:* SRS, Social Responsiveness Scale, Version 2; ENI, Evaluación Neuropsicológica del Niño; BASC-2, Behavior Assessment System for Children, 2nd edition; CADS, Conners' ADHD/DSM-IV Scales; ADHD, Attention Deficit Hyperactivity Disorder; DSM-IV, Diagnostic and Statistical Manual of Mental Disorders, 4th Edition; CPT-II, Continuous Performance Test, 2nd edition; ΣLMW, sum of metabolites of low-molecular weight phthalates; ΣHMW, sum of metabolites of high-molecular weight phthalates; ΣDEHP, sum of di(2-ethylhexyl) phthalate metabolites.

Models were adjusted for maternal age at enrollment, education, country of birth, years in the U.S., depression at time of assessment; child sex, child age at time of assessment, language of assessment, HOME score, and household income at time of assessment. CPT-II models were also adjusted for children's video game usage.

<sup>a</sup> Separate models created for each sum of metabolites (ΣDEHP, ΣHMW, ΣLMW).

<sup>b</sup> (+) Higher scores indicate poorer performance/more symptomatic behavior; (-) Lower scores indicate poorer performance/more symptomatic behavior.

<sup>c</sup> Outcomes measured at one time point and modeled using linear regression.

<sup>d</sup> Number of children with data = 245 (113 boys and 132 girls).

<sup>e</sup> Number of children with data = 313 (144 boys and 169 girls).

<sup>f</sup> Number of children with data = 310 (143 boy sand 167 girls)

<sup>g</sup> Number of children with data = 328 (158 boys and 170 girls).

<sup>h</sup> Number of children with data = 322 (153 boys and 169 girls).

<sup>i</sup> Number of children with data = 313 (150 boys and 163 girls).

<sup>j</sup> Number of children with data = 265 (123 boys and 142 girls).

<sup>k</sup> Number of children with data = 276 (128 boys and 148 girls).

<sup>l</sup> Number of children with data = 317 (151 boys and 166 girls).

<sup>m</sup> Number of children with data = 316 (150 boys and 166 girls).

<sup>n</sup> Number of children with data = 315 (150 boys and 165 girls).

<sup>o</sup> Number of children with data = 332 (159 boys and 173 girls).

<sup>p</sup> Number of children with data = 261 (122 boys and 139 girls).

<sup>q</sup> Number of children with data = 260 (122 boys and 138 girls).

<sup>r</sup> Number of children with data = 264 (123 boys and 141 girls).

<sup>s</sup> Number of children with data = 327 (151 boys and 166 girls).

**Table S15.** Adjusted associations [ $\beta$  (95% CI)] of prenatal urinary phthalate biomarker concentrations (nmol/mL; log<sub>2</sub>-transformed and specific gravity-adjusted)<sup>a</sup> with self-reported BASC-2 behavior outcomes at 10.5, 14, and 16 years using linear regression models stratified by sex, CHAMACOS.

| Outcomes                              | Orientation <sup>b</sup> | ΣLMW            |                  |       | ΣHMW            |                  |       | ΣDEHP           |                  |       |
|---------------------------------------|--------------------------|-----------------|------------------|-------|-----------------|------------------|-------|-----------------|------------------|-------|
|                                       |                          | Boys            | Girls            | p-int | Boys            | Girls            | p-int | Boys            | Girls            | p-int |
| 10.5-year assessment                  |                          |                 |                  |       |                 |                  |       |                 |                  |       |
| Internalizing problems                | (+)                      | -               | -                | -     | -               | -                | -     | -               | -                | -     |
| Depression scale <sup>c</sup>         | (+)                      | 0.0 (-0.8, 0.8) | 1.0 (-0.1, 2.0)  | 0.15  | 0.6 (-1.1, 2.2) | 0.4 (-1.4, 2.3)  | 0.90  | 0.4 (-1.2, 1.9) | 0.4 (-1.4, 2.1)  | 0.99  |
| Anxiety scale <sup>c</sup>            | (+)                      | 0.0 (-0.9, 1.0) | 0.5 (-0.2, 1.3)  | 0.44  | 0.1 (-1.7, 1.9) | 0.6 (-0.8, 1.9)  | 0.70  | 0.0 (-1.7, 1.7) | 0.6 (-0.7, 1.9)  | 0.58  |
| Externalizing problems                | (+)                      |                 |                  |       |                 |                  |       |                 |                  |       |
| Hyperactivity scale <sup>d</sup>      | (+)                      | 0.3 (-0.7, 1.2) | 0.1 (-0.6, 0.9)  | 0.79  | 0.7 (-1.0, 2.4) | 0.2 (-1.3, 1.6)  | 0.65  | 0.4 (-1.2, 1.9) | 0.2 (-1.2, 1.5)  | 0.84  |
| Attention problems scale <sup>e</sup> | (+)                      | 0.6 (-0.4, 1.6) | -0.2 (-1.0, 0.5) | 0.21  | 0.3 (-1.2, 1.8) | -0.2 (-1.7, 1.3) | 0.64  | 0.2 (-1.2, 1.7) | 0.0 (-1.4, 1.3)  | 0.76  |
| 14-year assessment                    |                          |                 |                  |       |                 |                  |       |                 |                  |       |
| Internalizing problems                | (+)                      |                 |                  |       |                 |                  |       |                 |                  |       |
| Depression scale <sup>f</sup>         | (+)                      | 0.1 (-0.8, 1.0) | 0.9 (-0.2, 1.9)  | 0.26  | 1.1 (-0.7, 2.8) | 0.6 (-1.1, 2.3)  | 0.67  | 1.2 (-0.4, 2.8) | 0.2 (-1.3, 1.7)  | 0.38  |
| Anxiety scale <sup>g</sup>            | (+)                      | 0.1 (-0.7, 1.0) | 0.7 (-0.3, 1.7)  | 0.44  | 1.2 (-0.1, 2.6) | -1.1 (-2.5, 0.4) | 0.02  | 1.2 (-0.1, 2.5) | -1.2 (-2.5, 0.2) | 0.01  |
| Externalizing problems                | (+)                      |                 |                  |       |                 |                  |       |                 |                  |       |
| Hyperactivity scale                   | (+)                      | -               | -                | -     | -               | -                | -     | -               | -                | -     |
| Attention problems scale              | (+)                      | -               | -                | -     | -               | -                | -     | -               | -                | -     |
| 16-year assessment                    |                          |                 |                  |       |                 |                  |       |                 |                  |       |
| Internalizing problems <sup>h</sup>   | (+)                      | 1.6 (0.6, 2.7)  | 1.0 (-0.1, 2.1)  | 0.44  | 1.0 (-0.4, 2.5) | 0.3 (-1.3, 1.8)  | 0.48  | 1.0 (-0.4, 2.4) | 0.2 (-1.3, 1.7)  | 0.43  |
| Depression scale <sup>i</sup>         | (+)                      | 0.7 (-0.2, 1.5) | 0.9 (-0.3, 2.1)  | 0.74  | 0.7 (-0.5, 1.9) | 0.0 (-1.8, 1.9)  | 0.54  | 0.7 (-0.4, 1.8) | 0.1 (-1.6, 1.8)  | 0.52  |
| Anxiety scale <sup>i</sup>            | (+)                      | 1.2 (0.0, 2.5)  | 0.7 (-0.6, 2.0)  | 0.57  | 1.3 (-0.4, 3.0) | 0.9 (-0.8, 2.6)  | 0.74  | 1.4 (-0.2, 2.9) | 0.6 (-1.0, 2.2)  | 0.53  |
| Externalizing problems                | (+)                      |                 |                  |       |                 |                  |       |                 |                  |       |
| Hyperactivity scale <sup>j</sup>      | (+)                      | 0.8 (-0.4, 2.0) | 0.6 (-0.2, 1.5)  | 0.82  | 0.9 (-0.7, 2.5) | -0.4 (-1.8, 1.0) | 0.23  | 0.6 (-1.0, 2.2) | -0.6 (-1.9, 0.7) | 0.27  |
| Attention problems scale <sup>i</sup> | (+)                      | 2.2 (1.0, 3.4)  | 1.0 (0.1, 2.0)   | 0.14  | 0.4 (-1.0, 1.9) | -0.8 (-2.2, 0.6) | 0.23  | 0.4 (-0.9, 1.7) | -0.9 (-2.2, 0.5) | 0.19  |

*Abbreviations:* BASC-2, Behavior Assessment System for Children, 2nd edition; ΣLMW, sum of metabolites of low-molecular weight phthalates; ΣHMW, sum of metabolites of high-molecular weight phthalates; ΣDEHP, sum of di(2-ethylhexyl) phthalate metabolites.

Models were adjusted for maternal age at enrollment, education, country of birth, years in the U.S., depression at time of assessment; child sex, child age at time of assessment, language of assessment, HOME score, and household income at time of assessment.

<sup>a</sup> Separate models created for each sum of metabolites (ΣDEHP, ΣHMW, ΣLMW).

<sup>b</sup> (+) Higher scores indicate poorer performance/more symptomatic behavior; (-) Lower scores indicate poorer performance/more symptomatic behavior.

<sup>c</sup> Number of children with data = 289 (135 boys and 154 girls).

<sup>d</sup> Number of children with data = 299 (141 boys and 158 girls).

<sup>e</sup> Number of children with data = 290 (137 boys and 153 girls).

<sup>f</sup> Number of children with data = 301 (139 boy sand 162 girls)

<sup>g</sup> Number of children with data = 300 (139 boys and 161 girls).

<sup>h</sup> Number of children with data = 283 (132 boys and 151 girls).

<sup>i</sup> Number of children with data = 286 (133 boys and 153 girls).

<sup>j</sup> Number of children with data = 285 (133 boys and 152 girls).



**Table S16.** Adjusted associations [ $\beta$  (95% CI)] of individual prenatal urinary phthalate biomarker concentrations (ng/mL; log<sub>2</sub>-transformed and specific gravity-adjusted)<sup>a</sup> with social cognition and behavior outcomes at 7, 9, 10.5, 12, 14, and/or 16 years using GEE models, CHAMACOS.

| Outcome                                        | MEP              | MBP              | MiBP             | MBzP             | MCP              | MCOP              | MCNP              | MEHP             | MEHHP            | MECPP            | MEOHP            |
|------------------------------------------------|------------------|------------------|------------------|------------------|------------------|-------------------|-------------------|------------------|------------------|------------------|------------------|
| <i>Social Cognition</i> <sup>b</sup>           |                  |                  |                  |                  |                  |                   |                   |                  |                  |                  |                  |
| SRS Total Score <sup>c</sup>                   | 0.4 (-0.1, 0.9)  | -0.1 (-0.8, 0.7) | -0.3 (-0.9, 0.3) | -0.1 (-0.8, 0.5) | 0.0 (-0.7, 0.7)  | 0.1 (-0.7, 0.8)   | 0.1 (-0.7, 0.9)   | -0.2 (-0.8, 0.5) | -0.3 (-1.0, 0.4) | -0.3 (-1.1, 0.5) | -0.2 (-1.0, 0.5) |
| ENI <sup>d</sup>                               | 0.0 (-0.1, 0.1)  | 0.1 (0.0, 0.2)   | 0.1 (0.0, 0.2)   | 0.0 (0.0, 0.1)   | 0.0 (-0.1, 0.2)  | 0.0 (-0.1, 0.2)   | 0.0 (-0.1, 0.1)   | 0.0 (0.0, 0.1)   | 0.1 (0.0, 0.2)   | 0.1 (0.0, 0.2)   | 0.1 (0.0, 0.2)   |
| NEPSY-II Affect Recognition <sup>e</sup>       | 0.0 (-0.3, 0.2)  | -0.2 (-0.5, 0.1) | -0.2 (-0.4, 0.1) | -0.3 (-0.6, 0.0) | -0.2 (-0.5, 0.1) | -0.5 (-0.9, -0.2) | -0.2 (-0.5, 0.2)  | -0.1 (-0.4, 0.2) | -0.2 (-0.5, 0.2) | -0.1 (-0.5, 0.3) | -0.2 (-0.5, 0.1) |
| <i>Behavior</i>                                |                  |                  |                  |                  |                  |                   |                   |                  |                  |                  |                  |
| BASC-2 – parent report (T-score)               |                  |                  |                  |                  |                  |                   |                   |                  |                  |                  |                  |
| Internalizing problems <sup>f</sup>            | 0.4 (0.0, 0.9)   | 0.4 (-0.2, 1.0)  | 0.3 (-0.3, 0.9)  | 0.7 (0.0, 1.4)   | 0.6 (-0.1, 1.3)  | 0.8 (0.0, 1.5)    | 0.1 (-0.7, 0.9)   | 0.2 (-0.5, 0.9)  | 0.3 (-0.5, 1.0)  | 0.5 (-0.4, 1.4)  | 0.3 (-0.5, 1.0)  |
| Depression scale <sup>cbg</sup>                | 0.4 (-0.1, 0.9)  | 0.0 (-0.7, 0.7)  | 0.6 (-0.1, 1.3)  | 0.8 (0.0, 1.5)   | 0.0 (-0.7, 0.7)  | 0.3 (-0.6, 1.2)   | 0.1 (-0.8, 1.0)   | 0.3 (-0.4, 1.0)  | 0.3 (-0.5, 1.0)  | 0.2 (-0.6, 1.1)  | 0.3 (-0.5, 1.1)  |
| Anxiety scale <sup>bh</sup>                    | 0.3 (-0.3, 0.8)  | 0.4 (-0.3, 1.2)  | 0.4 (-0.4, 1.1)  | 0.4 (-0.5, 1.2)  | 0.2 (-0.7, 1.0)  | 0.7 (-0.5, 1.8)   | -0.2 (-1.3, 0.8)  | 0.6 (-0.3, 1.5)  | 0.5 (-0.5, 1.5)  | 0.6 (-0.5, 1.7)  | 0.5 (-0.5, 1.5)  |
| Externalizing problems <sup>f</sup>            | 0.1 (-0.3, 0.5)  | 0.1 (-0.5, 0.7)  | 0.2 (-0.4, 0.7)  | 0.5 (-0.1, 1.1)  | 0.5 (-0.1, 1.2)  | 0.5 (-0.2, 1.3)   | -0.1 (-0.8, 0.6)  | 0.1 (-0.5, 0.7)  | 0.0 (-0.6, 0.6)  | 0.1 (-0.7, 0.8)  | 0.0 (-0.6, 0.6)  |
| Hyperactivity scale <sup>f</sup>               | 0.0 (-0.4, 0.4)  | 0.1 (-0.5, 0.7)  | 0.0 (-0.5, 0.5)  | 0.4 (-0.2, 0.9)  | 0.3 (-0.3, 0.9)  | 0.3 (-0.4, 1.0)   | -0.3 (-0.9, 0.4)  | -0.1 (-0.6, 0.5) | -0.2 (-0.7, 0.4) | -0.1 (-0.8, 0.5) | -0.1 (-0.7, 0.4) |
| Attention problems scale <sup>f</sup>          | 0.1 (-0.4, 0.5)  | -0.2 (-0.9, 0.5) | -0.1 (-0.7, 0.5) | 0.1 (-0.6, 0.7)  | 0.2 (-0.6, 1.0)  | 0.2 (-0.6, 1.0)   | -0.4 (-1.2, 0.4)  | -0.1 (-0.8, 0.6) | -0.2 (-0.9, 0.6) | 0.0 (-0.9, 0.8)  | -0.1 (-0.9, 0.6) |
| BASC-2 – teacher-report (T-score) <sup>f</sup> |                  |                  |                  |                  |                  |                   |                   |                  |                  |                  |                  |
| Internalizing problems <sup>i</sup>            | -0.6 (-1.4, 0.2) | -0.2 (-1.3, 0.9) | -0.1 (-0.9, 0.8) | -0.3 (-1.4, 0.7) | -0.3 (-1.5, 0.9) | -1.0 (-2.2, 0.3)  | -1.8 (-3.1, -0.4) | -0.4 (-1.4, 0.6) | -0.4 (-1.6, 0.8) | -0.2 (-1.6, 1.2) | -0.3 (-1.5, 0.8) |
| Depression scale <sup>i</sup>                  | -0.6 (-1.2, 0.1) | -0.4 (-1.2, 0.5) | 0.2 (-0.4, 0.9)  | -0.1 (-0.9, 0.7) | -0.3 (-1.3, 0.7) | -0.1 (-1.2, 0.9)  | -1.0 (-2.0, 0.1)  | -0.2 (-1.2, 0.8) | -0.2 (-1.2, 0.8) | -0.2 (-1.4, 1.0) | -0.2 (-1.2, 0.8) |
| Anxiety scale <sup>i</sup>                     | -0.7 (-1.5, 0.1) | -0.6 (-1.7, 0.5) | -0.1 (-1.1, 0.9) | -0.6 (-1.7, 0.4) | -0.6 (-1.8, 0.6) | -1.4 (-2.6, -0.2) | -1.7 (-3.1, -0.3) | -0.6 (-1.6, 0.4) | -0.8 (-2.0, 0.3) | -0.5 (-1.8, 0.8) | -0.7 (-1.9, 0.4) |
| Externalizing problems <sup>i</sup>            | -0.1 (-0.7, 0.6) | -0.5 (-1.4, 0.4) | 0.3 (-0.6, 1.2)  | -0.4 (-1.2, 0.5) | 0.1 (-0.8, 1.0)  | -0.5 (-1.6, 0.5)  | -1.2 (-2.2, -0.2) | -0.2 (-1.0, 0.6) | 0.0 (-0.8, 0.8)  | 0.4 (-0.6, 1.3)  | 0.1 (-0.7, 0.9)  |
| Hyperactivity scale <sup>i</sup>               | 0.1 (-0.6, 0.7)  | -0.5 (-1.4, 0.4) | 0.2 (-0.8, 1.2)  | -0.5 (-1.4, 0.5) | 0.0 (-1.1, 1.1)  | -0.6 (-1.8, 0.7)  | -1.3 (-2.4, -0.3) | -0.2 (-1.1, 0.6) | -0.2 (-1.2, 0.7) | 0.1 (-1.0, 1.1)  | -0.2 (-1.1, 0.8) |
| Attention problems scale <sup>i</sup>          | -0.1 (-0.7, 0.4) | -0.3 (-1.1, 0.4) | 0.1 (-0.6, 0.7)  | -0.6 (-1.3, 0.1) | -0.6 (-1.4, 0.2) | -0.4 (-1.2, 0.4)  | -0.8 (-1.7, 0.0)  | -0.2 (-0.9, 0.5) | -0.5 (-1.3, 0.3) | -0.1 (-1.0, 0.8) | -0.4 (-1.2, 0.4) |
| BASC-2 – self-report (T-score)                 |                  |                  |                  |                  |                  |                   |                   |                  |                  |                  |                  |
| Internalizing problems <sup>bj</sup>           | 1.2 (0.5, 1.9)   | 0.2 (-0.7, 1.1)  | 0.1 (-0.8, 0.9)  | 0.1 (-0.8, 0.9)  | 1.1 (0.2, 1.9)   | 0.8 (-0.2, 1.8)   | 0.3 (-0.9, 1.4)   | 0.1 (-0.7, 0.9)  | 0.2 (-0.7, 1.1)  | 0.5 (-0.5, 1.5)  | 0.2 (-0.6, 1.1)  |
| Depression scale <sup>k</sup>                  | 0.5 (0.1, 0.9)   | 0.1 (-0.6, 0.8)  | 0.1 (-0.4, 0.7)  | 0.5 (-0.1, 1.2)  | 0.5 (-0.1, 1.1)  | 0.4 (-0.4, 1.2)   | 0.7 (-0.1, 1.4)   | 0.2 (-0.5, 0.8)  | 0.2 (-0.4, 0.9)  | 0.5 (-0.3, 1.4)  | 0.3 (-0.4, 1.0)  |
| Anxiety scale <sup>l</sup>                     | 0.5 (0.1, 1.0)   | 0.0 (-0.7, 0.7)  | -0.2 (-0.7, 0.4) | 0.3 (-0.3, 0.9)  | 0.5 (-0.1, 1.1)  | 0.4 (-0.3, 1.2)   | 0.4 (-0.4, 1.1)   | 0.1 (-0.6, 0.7)  | 0.0 (-0.7, 0.6)  | 0.3 (-0.4, 1.1)  | 0.1 (-0.6, 0.7)  |
| Externalizing problems                         | -                | -                | -                | -                | -                | -                 | -                 | -                | -                | -                | -                |
| Hyperactivity scale <sup>m</sup>               | 0.5 (0.1, 0.9)   | -0.1 (-0.8, 0.6) | -0.2 (-0.8, 0.4) | 0.7 (0.1, 1.3)   | 0.9 (0.4, 1.5)   | 0.7 (-0.1, 1.5)   | 0.5 (-0.3, 1.3)   | 0.0 (-0.6, 0.7)  | 0.1 (-0.6, 0.8)  | 0.0 (-0.8, 0.8)  | 0.1 (-0.6, 0.8)  |
| Attention problems scale <sup>m</sup>          | 0.7 (0.3, 1.2)   | 0.2 (-0.5, 0.9)  | -0.2 (-0.7, 0.4) | 0.4 (-0.2, 1.0)  | 0.9 (0.3, 1.5)   | 0.5 (-0.3, 1.2)   | 0.3 (-0.4, 1.1)   | -0.1 (-0.7, 0.5) | -0.2 (-0.8, 0.4) | -0.2 (-1.0, 0.5) | -0.1 (-0.8, 0.5) |
| CADS – parent report (T-score)                 |                  |                  |                  |                  |                  |                   |                   |                  |                  |                  |                  |
| ADHD Index <sup>n</sup>                        | -0.3 (-0.6, 0.1) | -0.3 (-0.9, 0.2) | -0.2 (-0.7, 0.3) | 0.0 (-0.7, 0.6)  | -0.4 (-1.0, 0.2) | 0.0 (-0.8, 0.9)   | -0.4 (-1.1, 0.2)  | -0.1 (-0.7, 0.5) | -0.3 (-0.9, 0.3) | -0.2 (-0.9, 0.6) | -0.3 (-1.0, 0.4) |
| DSM-IV Total Scale <sup>n</sup>                | -0.2 (-0.6, 0.1) | -0.2 (-0.8, 0.4) | -0.1 (-0.7, 0.4) | 0.1 (-0.5, 0.8)  | -0.2 (-0.8, 0.4) | 0.1 (-0.8, 0.9)   | -0.3 (-1.0, 0.4)  | 0.0 (-0.7, 0.6)  | -0.2 (-0.9, 0.5) | -0.2 (-0.9, 0.6) | -0.3 (-1.0, 0.4) |
| Inattentive Scale <sup>n</sup>                 | -0.2 (-0.6, 0.1) | -0.4 (-0.9, 0.2) | -0.2 (-0.7, 0.3) | -0.1 (-0.7, 0.5) | -0.3 (-0.8, 0.2) | 0.0 (-0.8, 0.8)   | -0.4 (-1.0, 0.2)  | 0.0 (-0.6, 0.5)  | -0.3 (-0.9, 0.3) | -0.2 (-0.9, 0.5) | -0.3 (-0.9, 0.3) |
| Hyperactive/impulsive scale <sup>n</sup>       | -0.2 (-0.7, 0.2) | 0.0 (-0.6, 0.7)  | -0.1 (-0.6, 0.5) | 0.3 (-0.3, 1.0)  | 0.0 (-0.7, 0.6)  | 0.1 (-0.9, 1.1)   | -0.1 (-0.9, 0.7)  | 0.0 (-0.7, 0.7)  | -0.1 (-0.9, 0.6) | -0.1 (-1.0, 0.7) | -0.2 (-1.0, 0.6) |
| CADS – teacher-report (T-score) <sup>b</sup>   |                  |                  |                  |                  |                  |                   |                   |                  |                  |                  |                  |
| ADHD Index <sup>o</sup>                        | -0.3 (-1.0, 0.5) | -0.3 (-1.4, 0.7) | 0.0 (-1.0, 0.9)  | -0.2 (-1.4, 0.9) | -0.6 (-1.9, 0.7) | -0.5 (-1.7, 0.8)  | -1.4 (-2.8, 0.0)  | -0.1 (-1.2, 0.9) | -0.6 (-1.7, 0.6) | -0.1 (-1.5, 1.2) | -0.5 (-1.7, 0.7) |
| DSM-IV Total Scale <sup>p</sup>                | -0.1 (-0.8, 0.5) | -0.2 (-1.2, 0.8) | 0.3 (-0.5, 1.1)  | -0.1 (-1.0, 0.8) | -0.5 (-1.6, 0.6) | -0.4 (-1.5, 0.8)  | -1.2 (-2.5, 0.0)  | 0.0 (-0.9, 0.9)  | -0.3 (-1.2, 0.7) | 0.1 (-1.0, 1.3)  | -0.2 (-1.2, 0.8) |
| Inattentive Scale <sup>q</sup>                 | -0.1 (-0.7, 0.5) | 0.0 (-0.9, 0.8)  | 0.2 (-0.4, 0.9)  | -0.1 (-0.9, 0.7) | -0.5 (-1.4, 0.4) | 0.0 (-0.9, 0.9)   | -0.8 (-1.9, 0.2)  | 0.0 (-0.7, 0.8)  | -0.2 (-1.1, 0.6) | 0.1 (-0.9, 1.1)  | -0.2 (-1.0, 0.7) |
| Hyperactive/impulsive scale <sup>q</sup>       | 0.0 (-0.7, 0.6)  | -0.2 (-1.2, 0.7) | 0.4 (-0.5, 1.2)  | 0.1 (-0.9, 1.1)  | -0.2 (-1.3, 1.0) | -0.5 (-1.7, 0.7)  | -1.3 (-2.5, -0.1) | 0.1 (-0.9, 1.0)  | 0.0 (-1.0, 1.0)  | 0.4 (-0.8, 1.5)  | 0.1 (-0.9, 1.1)  |
| CPT-II (T-score)                               |                  |                  |                  |                  |                  |                   |                   |                  |                  |                  |                  |
| Errors of omission <sup>r</sup>                | 0.8 (0.0, 1.6)   | 0.3 (-0.7, 1.3)  | 0.3 (-0.5, 1.1)  | 0.5 (-0.4, 1.3)  | 0.2 (-0.6, 1.0)  | 0.5 (-0.7, 1.6)   | 0.1 (-1.1, 1.2)   | -0.3 (-1.4, 0.7) | 0.0 (-1.0, 1.0)  | -0.3 (-1.4, 0.8) | 0.0 (-1.0, 1.0)  |
| Errors of commission <sup>r</sup>              | 0.3 (-0.1, 0.8)  | -0.4 (-1.1, 0.4) | -0.1 (-0.7, 0.6) | 0.4 (-0.3, 1.1)  | 0.6 (-0.2, 1.5)  | 0.9 (-0.1, 1.8)   | 0.4 (-0.6, 1.4)   | -0.2 (-1.0, 0.5) | -0.2 (-1.0, 0.6) | -0.2 (-1.1, 0.7) | -0.3 (-1.1, 0.5) |
| ADHD confidence index <sup>r</sup>             | 0.6 (-0.4, 1.7)  | 0.2 (-1.2, 1.6)  | 0.9 (-0.4, 2.1)  | 0.5 (-1.0, 1.9)  | 0.2 (-1.1, 1.5)  | -0.1 (-1.8, 1.7)  | -0.8 (-2.6, 0.9)  | -1.3 (-2.7, 0.1) | -0.6 (-2.1, 0.9) | -1.2 (-2.9, 0.4) | -0.6 (-2.1, 0.9) |

*Abbreviations:* SRS, Social Responsiveness Scale, Version 2; ENI, Evaluación Neuropsicológica del Niño; BASC-2, Behavior Assessment System for Children, 2nd edition; CADS, Conners' ADHD/DSM-IV Scales; ADHD, Attention Deficit Hyperactivity Disorder; DSM-IV, Diagnostic and Statistical Manual of Mental Disorders, 4th Edition; CPT-II, Continuous Performance Test, 2nd edition;  $\Sigma$ LMW, sum of metabolites of low-molecular weight phthalates;  $\Sigma$ HMW, sum of metabolites of high-molecular weight phthalates;  $\Sigma$ DEHP, sum of di(2-ethylhexyl) phthalate metabolites.

Models were adjusted for maternal age at enrollment, education, country of birth, years in the U.S., depression at time of assessment; child sex, child age at time of assessment, language of assessment, HOME score, and household income at time of assessment.

<sup>a</sup> Separate models created for each sum of metabolites ( $\Sigma$ DEHP,  $\Sigma$ HMW,  $\Sigma$ LMW).

<sup>b</sup> Outcomes measured at one time point and modeled using linear regression.

<sup>c</sup> Number of children with data = 245 (113 boys and 132 girls).

<sup>d</sup> Number of children with data = 313 (144 boys and 169 girls).

<sup>e</sup> Number of children with data = 310 (143 boys and 167 girls).

<sup>f</sup> Number of children with data = 328 (168 boys and 170 girls).

<sup>g</sup> Number of children with data = 322 (153 boys and 169 girls).

<sup>h</sup> Number of children with data = 313 (150 boys and 163 girls).

<sup>i</sup> Number of children with data = 265 (123 boys and 142 girls).

<sup>j</sup> Number of children with data = 276 (128 boys and 148 girls).

<sup>k</sup> Number of children with data = 317 (151 boys and 166 girls).

<sup>l</sup> Number of children with data = 316 (150 boys and 166 girls).

<sup>m</sup> Number of children with data = 315 (150 boys and 165 girls).

<sup>n</sup> Number of children with data = 332 (159 boys and 173 girls).

<sup>o</sup> Number of children with data = 261 (122 boys and 139 girls).

<sup>p</sup> Number of children with data = 260 (122 boys and 138 girls).

<sup>q</sup> Number of children with data = 264 (123 boys and 141 girls).

<sup>r</sup> Number of children with data = 317 (151 boys and 166 girls).

**Table S17.** Adjusted associations [ $\beta$  (95% CI)] of individual prenatal urinary phthalate biomarker concentrations (ng/mL; log<sub>2</sub>-transformed and specific gravity-adjusted)<sup>a</sup> with self-reported BASC-2 behavior outcomes at 10.5, 14, and 16 years using linear regression models, CHAMACOS.

| Outcome                               | MEP             | MBP              | MiBP             | MBzP             | MCP             | MCOP            | MCNP            | MEHP             | MEHHP            | MCCPP            | MEOHP            |
|---------------------------------------|-----------------|------------------|------------------|------------------|-----------------|-----------------|-----------------|------------------|------------------|------------------|------------------|
| 10.5-year assessment                  |                 |                  |                  |                  |                 |                 |                 |                  |                  |                  |                  |
| Internalizing problems                |                 |                  |                  |                  |                 |                 |                 |                  |                  |                  |                  |
| Depression scale <sup>c</sup>         | 0.5 (-0.1, 1.1) | 0.1 (-0.7, 1.0)  | 0.0 (-0.8, 0.8)  | 0.5 (-0.3, 1.4)  | 0.3 (-0.5, 1.1) | 0.4 (-0.5, 1.3) | 0.5 (-0.5, 1.6) | 0.3 (-0.7, 1.2)  | 0.4 (-0.6, 1.3)  | 0.8 (-0.4, 2.0)  | 0.6 (-0.4, 1.6)  |
| Anxiety scale <sup>c</sup>            | 0.4 (-0.2, 0.9) | 0.2 (-0.7, 1.0)  | -0.1 (-0.8, 0.7) | 0.3 (-0.5, 1.0)  | 0.5 (-0.2, 1.2) | 0.4 (-0.5, 1.3) | 0.7 (-0.3, 1.6) | 0.2 (-0.6, 1.0)  | 0.2 (-0.7, 1.0)  | 0.6 (-0.4, 1.6)  | 0.3 (-0.6, 1.2)  |
| Externalizing problems                |                 |                  |                  |                  |                 |                 |                 |                  |                  |                  |                  |
| Hyperactivity scale <sup>d</sup>      | 0.2 (-0.3, 0.8) | 0.1 (-0.8, 1.0)  | -0.1 (-0.9, 0.6) | 0.9 (0.1, 1.6)   | 0.7 (-0.0, 1.5) | 0.9 (-0.0, 1.9) | 0.8 (-0.2, 1.8) | 0.3 (-0.5, 1.1)  | 0.2 (-0.6, 1.1)  | 0.3 (-0.7, 1.4)  | 0.3 (-0.5, 1.2)  |
| Attention problems scale <sup>e</sup> | 0.1 (-0.5, 0.7) | 0.2 (-0.6, 1.1)  | -0.4 (-1.0, 0.3) | 0.2 (-0.6, 1.0)  | 0.7 (-0.1, 1.4) | 0.5 (-0.5, 1.4) | 0.5 (-0.6, 1.5) | -0.1 (-0.9, 0.7) | -0.1 (-1.0, 0.7) | 0.0 (-1.0, 1.0)  | 0.0 (-0.8, 0.9)  |
| 14-year assessment                    |                 |                  |                  |                  |                 |                 |                 |                  |                  |                  |                  |
| Internalizing problems                |                 |                  |                  |                  |                 |                 |                 |                  |                  |                  |                  |
| Depression scale <sup>f</sup>         | 0.5 (-0.1, 1.1) | 0.3 (-0.7, 1.2)  | 0.2 (-0.6, 0.9)  | 0.8 (-0.1, 1.8)  | 0.4 (-0.4, 1.3) | 0.4 (-1.1, 1.7) | 1.1 (0.1, 2.2)  | 0.4 (-0.6, 1.3)  | 0.2 (-0.7, 1.2)  | 0.6 (-0.5, 1.8)  | 0.3 (-0.7, 1.4)  |
| Anxiety scale <sup>g</sup>            | 0.5 (-0.1, 1.1) | -0.2 (-1.1, 0.7) | -0.5 (-1.2, 0.3) | 0.2 (-0.6, 1.0)  | 0.3 (-0.5, 1.1) | 0.2 (-0.8, 1.2) | 0.2 (-0.8, 1.3) | -0.2 (-1.0, 0.6) | -0.5 (-1.4, 0.4) | -0.3 (-1.2, 0.7) | -0.4 (-1.2, 0.5) |
| Externalizing problems                |                 |                  |                  |                  |                 |                 |                 |                  |                  |                  |                  |
| Hyperactivity scale                   | -               | -                | -                | -                | -               | -               | -               | -                | -                | -                | -                |
| Attention problems scale              | -               | -                | -                | -                | -               | -               | -               | -                | -                | -                | -                |
| 16-year assessment                    |                 |                  |                  |                  |                 |                 |                 |                  |                  |                  |                  |
| Internalizing problems <sup>h</sup>   | 1.2 (0.5, 1.9)  | 0.1 (-0.8, 1.0)  | 0.0 (-0.8, 0.8)  | 0.2 (-0.7, 1.1)  | 1.3 (0.4, 2.1)  | 0.6 (-0.4, 1.6) | 0.2 (-1.0, 1.3) | 0.2 (-0.7, 0.9)  | 0.2 (-0.7, 1.1)  | 0.5 (-0.5, 1.5)  | 0.2 (-0.6, 1.1)  |
| Depression scale <sup>i</sup>         | 0.8 (0.1, 1.5)  | -0.2 (-1.0, 0.7) | 0.1 (-0.7, 0.9)  | -0.1 (-0.9, 0.8) | 0.7 (-0.1, 1.6) | 0.3 (-0.7, 1.3) | 0.3 (-0.8, 1.4) | 0.0 (-0.9, 0.8)  | 0.2 (-0.7, 1.0)  | 0.4 (-0.6, 1.4)  | 0.1 (-0.7, 1.0)  |
| Anxiety scale <sup>i</sup>            | 0.9 (0.1, 1.7)  | -0.1 (-1.1, 1.0) | -0.2 (-1.1, 0.8) | 0.3 (-0.6, 1.3)  | 0.9 (-0.1, 1.8) | 0.9 (-0.2, 2.0) | 0.3 (-0.9, 1.4) | 0.2 (-0.7, 1.1)  | 0.4 (-0.6, 1.3)  | 0.9 (-0.2, 2.0)  | 0.4 (-0.6, 1.4)  |
| Externalizing problems                |                 |                  |                  |                  |                 |                 |                 |                  |                  |                  |                  |
| Hyperactivity scale <sup>j</sup>      | 0.8 (0.2, 1.4)  | -0.4 (-1.3, 0.4) | -0.4 (-1.2, 0.3) | 0.4 (-0.4, 1.2)  | 1.4 (0.6, 2.1)  | 0.5 (-0.6, 1.6) | 0.3 (-0.8, 1.3) | -0.3 (-1.2, 0.6) | -0.1 (-1.0, 0.8) | -0.3 (-1.3, 0.8) | -0.2 (-1.1, 0.7) |
| Attention problems scale <sup>i</sup> | 1.5 (0.8, 2.1)  | 0.0 (-1.0, 0.9)  | -0.1 (-1.0, 0.7) | 0.5 (-0.4, 1.3)  | 1.2 (0.4, 2.1)  | 0.4 (-0.7, 1.6) | 0.1 (-1.0, 1.3) | 0.1 (-0.9, 0.8)  | -0.2 (-1.0, 0.7) | -0.4 (-1.3, 0.5) | -0.2 (-1.1, 0.6) |

*Abbreviations:* BASC-2, Behavior Assessment System for Children, 2nd edition;  $\Sigma$ LMW, sum of metabolites of low-molecular weight phthalates;  $\Sigma$ HMW, sum of metabolites of high-molecular weight phthalates;  $\Sigma$ EDEHP, sum of di(2-ethylhexyl) phthalate metabolites. Models were adjusted for maternal age at enrollment, education, country of birth, years in the U.S., depression at time of assessment; child sex, child age at time of assessment, language of assessment, HOME score, and household income at time of assessment.

<sup>a</sup> Separate models created for each sum of metabolites ( $\Sigma$ EDEHP,  $\Sigma$ HMW,  $\Sigma$ LMW).

<sup>b</sup> (+) Higher scores indicate poorer performance/more symptomatic behavior; (-) Lower scores indicate poorer performance/more symptomatic behavior.

<sup>c</sup> Number of children with data = 289 (135 boys and 154 girls).

<sup>d</sup> Number of children with data = 299 (141 boys and 158 girls).

<sup>e</sup> Number of children with data = 290 (137 boys and 153 girls).

<sup>f</sup> Number of children with data = 301 (139 boys and 162 girls).

<sup>g</sup> Number of children with data = 300 (139 boys and 161 girls).

<sup>h</sup> Number of children with data = 283 (132 boys and 151 girls).

<sup>i</sup> Number of children with data = 286 (133 boys and 153 girls).

<sup>j</sup> Number of children with data = 285 (133 boys and 152 girls).

**Table S18.** Adjusted associations [ $\beta$  (95% CI)] of prenatal urinary phthalate biomarker concentrations (nmol/mL; log<sub>2</sub>-transformed and specific gravity-adjusted)<sup>a</sup> with executive function and cognition outcomes at 7, 9, 10.5, 12, 14, and/or 16 years **excluding preterm birth and low birthweight** using GEE models, CHAMACOS.

| Outcomes                              | Orientation <sup>b</sup> | <i>n</i> | <i>k</i> | $\Sigma$ LMW      | $\Sigma$ HMW     | $\Sigma$ DEHP    |
|---------------------------------------|--------------------------|----------|----------|-------------------|------------------|------------------|
| <i>Executive function</i>             |                          |          |          |                   |                  |                  |
| WCST                                  |                          |          |          |                   |                  |                  |
| Errors (T-scores)                     | (-)                      | 551      | 294      | 0.2 (-0.4, 0.8)   | 0.6 (-0.2, 1.5)  | 0.6 (-0.2, 1.4)  |
| Preservative Errors (T-scores)        | (-)                      | 551      | 294      | 0.7 (-0.1, 1.5)   | 0.6 (-0.7, 1.9)  | 0.6 (-0.6, 1.8)  |
| BRIEF – maternal report (T-scores)    |                          |          |          |                   |                  |                  |
| Behavioral Regulation Index           | (+)                      | 856      | 307      | -0.1 (-0.6, 0.5)  | -0.1 (-1.1, 1.0) | -0.1 (-1.1, 0.8) |
| Metacognition Index                   | (+)                      | 855      | 306      | -0.6 (-1.1, -0.0) | -0.2 (-1.2, 0.8) | -0.2 (-1.2, 0.7) |
| Global Executive Composite            | (+)                      | 856      | 307      | -0.4 (-0.9, 0.1)  | -0.1 (-1.2, 0.9) | -0.2 (-1.1, 0.8) |
| NEPSY Tower                           | (-)                      | 291      | 291      | 0.1 (-0.1, 0.3)   | 0.1 (-0.2, 0.4)  | 0.1 (-0.3, 0.4)  |
| <i>Cognition</i>                      |                          |          |          |                   |                  |                  |
| WISC-IV Full-Scale IQ (scaled scores) | (-)                      | 551      | 298      | -0.1 (-0.9, 0.7)  | 0.1 (-1.4, 1.6)  | 0.1 (-1.4, 1.6)  |
| Verbal comprehension IQ               | (-)                      | 577      | 301      | -0.2 (-1.1, 0.6)  | -0.5 (-1.9, 0.9) | -0.5 (-1.8, 0.8) |
| Perceptual reasoning IQ               | (-)                      | 577      | 301      | 0.3 (-0.7, 1.3)   | 0.6 (-1.0, 2.2)  | 0.6 (-1.0, 2.0)  |
| Working memory IQ                     | (-)                      | 554      | 300      | -0.5 (-1.3, 0.2)  | -0.1 (-1.5, 1.4) | -0.0 (-1.4, 1.4) |
| Processing speed IQ                   | (-)                      | 555      | 300      | 0.4 (-0.3, 1.1)   | 0.9 (-0.3, 2.1)  | 0.9 (-0.3, 2.0)  |

*Abbreviations:* *n*, number of observations from all time points; *k*, number of children with data for at least one time point; WCST, Wisconsin Card Sort Task-64: Computer Version 2 – Research Edition; BRIEF, Behavior Rating Inventory Executive Function; WISC-IV, Wechsler Intelligence Scale for Children 4th edition;  $\Sigma$ LMW, sum of metabolites of low-molecular weight phthalates;  $\Sigma$ HMW, sum of metabolites of high-molecular weight phthalates;  $\Sigma$ DEHP, sum of di(2-ethylhexyl) phthalate metabolites.

Models were adjusted for maternal age at enrollment, education, country of birth, years in the U.S., depression at time of assessment; child sex, child age at time of assessment, language of assessment, HOME score, and household income at time of assessment. WCST models were also adjusted for children’s video game usage.

<sup>a</sup> Separate models created for each sum of metabolites ( $\Sigma$ DEHP,  $\Sigma$ HMW,  $\Sigma$ LMW).

<sup>b</sup> (+) Higher scores indicate poorer performance/more symptomatic behavior; (-) Lower scores indicate poorer performance/more symptomatic behavior.

**Table S19.** Adjusted associations [ $\beta$  (95% CI)] of prenatal urinary phthalate biomarker concentrations (nmol/mL; log<sub>2</sub>-transformed and specific gravity-adjusted)<sup>a</sup> with behavior and social cognition outcomes at 7, 9, 10.5, 12, 14 and/or 16 years **excluding preterm birth and low birthweight** using GEE models, CHAMACOS.

| Outcomes                                       | Orientation <sup>b</sup> | <i>n</i> | <i>k</i> | $\Sigma$ LMW      | $\Sigma$ HMW     | $\Sigma$ DEHP    |
|------------------------------------------------|--------------------------|----------|----------|-------------------|------------------|------------------|
| <i>Social Cognition</i> <sup>c</sup>           |                          |          |          |                   |                  |                  |
| SRS Total Score                                | (+)                      | 220      | 220      | 0.3 (-0.3, 1.0)   | -0.2 (-1.1, 0.7) | -0.2 (-1.1, 0.6) |
| ENI                                            | (-)                      | 291      | 291      | 0.1 (0.0, 0.1)    | 0.0 (-0.1, 0.2)  | 0.1 (-0.1, 0.2)  |
| NEPSY-II Affect Recognition                    | (-)                      | 286      | 286      | 0.0 (-0.3, 0.2)   | -0.3 (-0.8, 0.1) | -0.2 (-0.6, 0.2) |
| <i>Behavior</i>                                |                          |          |          |                   |                  |                  |
| BASC-2 – maternal report (T-scores)            |                          |          |          |                   |                  |                  |
| Internalizing problems                         | (+)                      | 575      | 300      | 0.5 (0.0, 1.1)    | 0.6 (-0.4, 1.6)  | 0.4 (-0.5, 1.4)  |
| Depression scale                               | (+)                      | 298      | 298      | 0.4 (-0.2, 1.0)   | 0.5 (-0.5, 1.4)  | 0.3 (-0.6, 1.2)  |
| Anxiety scale                                  | (+)                      | 298      | 298      | 0.4 (-0.2, 1.1)   | 0.6 (-0.6, 1.8)  | 0.4 (-0.7, 1.5)  |
| Externalizing problems                         | (+)                      | 568      | 300      | -0.1 (-0.6, 0.4)  | 0.3 (-0.6, 1.2)  | 0.2 (-0.6, 1.0)  |
| Hyperactivity scale                            | (+)                      | 575      | 300      | -0.3 (-0.7, 0.1)  | 0.0 (-0.8, 0.8)  | -0.1 (-0.8, 0.6) |
| Attention problems scale                       | (+)                      | 575      | 300      | -0.3 (-0.9, 0.2)  | -0.2 (-1.3, 0.8) | -0.2 (-1.1, 0.8) |
| BASC-2 – teacher-report (T-score) <sup>c</sup> |                          |          |          |                   |                  |                  |
| Internalizing problems                         | (+)                      | 246      | 246      | -0.8 (-1.8, 0.1)  | -0.5 (-2.0, 1.1) | -0.3 (-1.8, 1.1) |
| Depression scale                               | (+)                      | 246      | 246      | -0.8 (-1.5, 0.0)  | -0.1 (-1.4, 1.2) | -0.1 (-1.3, 1.1) |
| Anxiety scale                                  | (+)                      | 246      | 246      | -1.0 (-2.0, 0.0)  | -0.9 (-2.4, 0.6) | -0.8 (-2.2, 0.6) |
| Externalizing problems                         | (+)                      | 246      | 246      | -0.1 (-0.8, 0.6)  | -0.1 (-1.2, 1.0) | 0.1 (-0.9, 1.0)  |
| Hyperactivity scale                            | (+)                      | 246      | 246      | -0.1 (-0.8, 0.7)  | -0.4 (-1.6, 0.8) | -0.2 (-1.3, 0.9) |
| Attention problems scale                       | (+)                      | 246      | 246      | -0.2 (-0.8, 0.3)  | -0.6 (-1.5, 0.3) | -0.4 (-1.2, 0.5) |
| CADS – parent report (T-scores)                |                          |          |          |                   |                  |                  |
| ADHD Index                                     | (+)                      | 855      | 307      | -0.5 (-0.9, -0.1) | -0.2 (-1.1, 0.6) | -0.2 (-1.0, 0.6) |
| DSM-IV Total Scale                             | (+)                      | 854      | 307      | -0.4 (-0.8, 0.0)  | -0.2 (-1.1, 0.7) | -0.2 (-1.1, 0.6) |
| Inattentive Scale                              | (+)                      | 854      | 307      | -0.4 (-0.8, 0.0)  | -0.3 (-1.1, 0.5) | -0.3 (-1.0, 0.4) |
| Hyperactive/impulsive scale                    | (+)                      | 854      | 307      | -0.3 (-0.8, 0.2)  | -0.1 (-1.0, 0.9) | -0.2 (-1.1, 0.7) |
| CADS – teacher-report (T-score) <sup>c</sup>   |                          |          |          |                   |                  |                  |
| ADHD Index                                     | (+)                      | 242      | 242      | -0.5 (-1.3, 0.4)  | -0.7 (-2.2, 0.8) | -0.5 (-1.9, 0.8) |
| DSM-IV Total Scale                             | (+)                      | 241      | 241      | -0.3 (-1.0, 0.4)  | -0.3 (-1.6, 1.0) | -0.1 (-1.3, 1.0) |
| Inattentive Scale                              | (+)                      | 245      | 245      | -0.2 (-0.9, 0.4)  | -0.2 (-1.3, 0.9) | -0.1 (-1.1, 0.9) |
| Hyperactive/impulsive scale                    | (+)                      | 245      | 245      | -0.1 (-0.8, 0.6)  | 0.0 (-1.2, 1.3)  | 0.2 (-1.0, 1.4)  |

|                       |     |     |     |                 |  |                  |                  |
|-----------------------|-----|-----|-----|-----------------|--|------------------|------------------|
| CPT-II (T-scores)     |     |     |     |                 |  |                  |                  |
| Errors of omission    | (+) | 554 | 294 | 0.8 (-0.1, 1.8) |  | 0.1 (-1.2, 1.3)  | 0.0 (-1.2, 1.1)  |
| Errors of commission  | (+) | 554 | 294 | 0.2 (-0.4, 0.8) |  | 0.0 (-1.0, 1.0)  | -0.1 (-1.1, 0.8) |
| ADHD confidence index | (+) | 555 | 294 | 0.6 (-0.6, 1.9) |  | -0.7 (-2.5, 1.1) | -0.7 (-2.4, 1.0) |

*Abbreviations:* *n*, number of observations from all time points; *k*, number of children with data for at least one time point; SRS, Social Responsiveness Scale, Version 2; ENI, Evaluación Neuropsicológica del Niño; BASC-2, Behavior Assessment System for Children, 2nd edition; CADS, Conners' ADHD/DSM-IV Scales; ADHD, Attention Deficit Hyperactivity Disorder; DSM-IV, Diagnostic and Statistical Manual of Mental Disorders, 4th Edition; CPT-II, Continuous Performance Test, 2nd edition;  $\Sigma$ LMW, sum of metabolites of low-molecular weight phthalates;  $\Sigma$ HMW, sum of metabolites of high-molecular weight phthalates;  $\Sigma$ DEHP, sum of di(2-ethylhexyl) phthalate metabolites.

Models were adjusted for maternal age at enrollment, education, country of birth, years in the U.S., depression at time of assessment; child sex, child age at time of assessment, language of assessment, HOME score, and household income at time of assessment. CPT-II models were also adjusted for children's video game usage at time of assessment.

<sup>a</sup> Separate models created for each sum of metabolites ( $\Sigma$ DEHP,  $\Sigma$ HMW,  $\Sigma$ LMW).

<sup>b</sup> (+) Higher scores indicate poorer performance/more symptomatic behavior; (-) Lower scores indicate poorer performance/more symptomatic behavior.

<sup>c</sup> Outcomes measured at one time point and modeled using linear regression.

**Table S20.** Adjusted associations [ $\beta$  (95% CI)] of prenatal urinary phthalate biomarker concentrations (nmol/mL; log<sub>2</sub>-transformed and specific gravity-adjusted)<sup>a</sup> with self-reported BASC-2 behavior outcomes at 10.5, 14, and 16 years **excluding preterm birth and low birthweight** using linear regression models, CHAMACOS.

| Outcome                  | Orientation <sup>b</sup> | <i>n</i> | $\Sigma$ LMW    | $\Sigma$ HMW     | $\Sigma$ DEHP    |
|--------------------------|--------------------------|----------|-----------------|------------------|------------------|
| 10.5-year assessment     |                          |          |                 |                  |                  |
| Internalizing problems   | (+)                      | -        | -               | -                | -                |
| Depression scale         | (+)                      | 269      | 0.5 (-0.2, 1.2) | 0.6 (-0.6, 1.9)  | 0.6 (-0.6, 1.8)  |
| Anxiety scale            | (+)                      | 269      | 0.4 (-0.2, 1.1) | 0.3 (-0.8, 1.3)  | 0.2 (-0.8, 1.2)  |
| Externalizing problems   |                          |          |                 |                  |                  |
| Hyperactivity scale      | (+)                      | 278      | 0.2 (-0.4, 0.8) | 0.4 (-0.6, 1.5)  | 0.3 (-0.7, 1.3)  |
| Attention problems scale | (+)                      | 270      | 0.1 (-0.6, 0.8) | 0.1 (-0.9, 1.2)  | 0.1 (-0.8, 1.1)  |
| 14-year assessment       |                          |          |                 |                  |                  |
| Internalizing problems   | (+)                      | -        | -               | -                | -                |
| Depression scale         | (+)                      | 279      | 0.4 (-0.3, 1.1) | 0.7 (-0.6, 2.0)  | 0.6 (-0.6, 1.8)  |
| Anxiety scale            | (+)                      | 278      | 0.3 (-0.4, 1.0) | -0.6 (-1.7, 0.5) | -0.6 (-1.6, 0.4) |
| Externalizing problems   |                          |          |                 |                  |                  |
| Hyperactivity scale      | (+)                      | -        | -               | -                | -                |
| Attention problems scale | (+)                      | -        | -               | -                | -                |
| 16-year assessment       |                          |          |                 |                  |                  |
| Internalizing problems   | (+)                      | 262      | 1.2 (0.4, 2.0)  | 0.2 (-0.8, 1.3)  | 0.2 (-0.8, 1.2)  |
| Depression scale         | (+)                      | 265      | 0.8 (0.1, 1.6)  | 0.1 (-1.0, 1.2)  | 0.2 (-0.8, 1.3)  |
| Anxiety scale            | (+)                      | 265      | 0.9 (0.0, 1.9)  | 0.5 (-0.7, 1.7)  | 0.5 (-0.6, 1.6)  |
| Externalizing problems   |                          |          |                 |                  |                  |
| Hyperactivity scale      | (+)                      | 264      | 0.7 (0.0, 1.4)  | -0.2 (-1.3, 0.8) | -0.5 (-1.5, 0.5) |
| Attention problems scale | (+)                      | 265      | 1.4 (0.6, 2.2)  | 0.0 (-1.0, 1.1)  | -0.1 (-1.1, 0.9) |

*Abbreviations:* BASC-2, Behavior Assessment System for Children, 2nd edition; *n*, number of observations; *k*, number of children;  $\Sigma$ LMW, sum of metabolites of low-molecular weight phthalates;  $\Sigma$ HMW, sum of metabolites of high-molecular weight phthalates;  $\Sigma$ DEHP, sum of di(2-ethylhexyl) phthalate metabolites.

Models were adjusted for maternal age at enrollment, education, country of birth, years in the U.S., depression at time of assessment; child sex, child age at time of assessment, language of assessment, HOME score, and household income at time of assessment.

<sup>a</sup> Separate models created for each sum of metabolites ( $\Sigma$ DEHP,  $\Sigma$ HMW,  $\Sigma$ LMW).

<sup>b</sup> (+) Higher scores indicate poorer performance/more symptomatic behavior; (-) Lower scores indicate poorer performance/more symptomatic behavior.

**Table S21.** Adjusted associations [ $\beta$  (95% CI)] of prenatal urinary phthalate biomarker concentrations (nmol/mL; log<sub>2</sub>-transformed and specific gravity-adjusted)<sup>a</sup> with executive function and cognition outcomes at 7, 9, 10.5, 12, 14, and/or 16 years including maternal PPVT score using GEE models, CHAMACOS.

| Outcomes                           | Orientation <sup>b</sup> | <i>n</i> | <i>k</i> | $\Sigma$ LMW     | $\Sigma$ HMW     | $\Sigma$ DEHP    |
|------------------------------------|--------------------------|----------|----------|------------------|------------------|------------------|
| <i>Executive function</i>          |                          |          |          |                  |                  |                  |
| WCST                               |                          |          |          |                  |                  |                  |
| Errors (T-scores)                  | (-)                      | 593      | 317      | 0.1 (-0.5, 0.8)  | 0.5 (-0.4, 1.4)  | 0.5 (-0.4, 1.3)  |
| Preservative Errors (T-scores)     | (-)                      | 593      | 317      | 0.7 (-0.1, 1.4)  | 0.7 (-0.6, 1.9)  | 0.6 (-0.5, 1.8)  |
| BRIEF – maternal report (T-scores) |                          |          |          |                  |                  |                  |
| Behavioral Regulation Index        | (+)                      | 922      | 331      | 0.1 (-0.4, 0.6)  | 0.1 (-0.8, 1.0)  | 0.0 (-0.8, 0.8)  |
| Metacognition Index                | (+)                      | 921      | 330      | -0.4 (-0.9, 0.1) | -0.1 (-1.0, 0.9) | -0.1 (-1.0, 0.7) |
| Global Executive Composite         | (+)                      | 922      | 331      | -0.2 (-0.8, 0.3) | 0.0 (-0.9, 1.0)  | -0.1 (-0.9, 0.8) |
| NEPSY Tower                        | (-)                      | 313      | 313      | 0.1 (-0.1, 0.3)  | 0.1 (0.2, 0.4)   | 0.1 (0.2, 0.4)   |
| <i>Cognition</i>                   |                          |          |          |                  |                  |                  |
| WISC-IV (scaled scores)            |                          |          |          |                  |                  |                  |
| Full-Scale IQ                      | (-)                      | 589      | 321      | -0.2 (-1.0, 0.7) | 0.1 (-1.2, 1.5)  | 0.1 (-1.2, 1.4)  |
| Verbal comprehension IQ            | (-)                      | 621      | 324      | -0.3 (-1.1, 0.5) | -0.3 (-1.5, 1.0) | -0.2 (-1.4, 1.0) |
| Perceptual reasoning IQ            | (-)                      | 621      | 324      | 0.3 (-0.7, 1.3)  | 0.5 (-1.0, 2.0)  | 0.4 (-1.0, 1.8)  |
| Working memory IQ                  | (-)                      | 593      | 323      | -0.6 (-1.4, 0.2) | -0.1 (-1.4, 1.3) | -0.0 (-1.3, 1.3) |
| Processing speed IQ                | (-)                      | 593      | 323      | 0.2 (-0.4, 0.9)  | 0.5 (-0.7, 1.8)  | 0.5 (-0.6, 1.7)  |

*Abbreviations:* *n*, number of observations from all time points; *k*, number of children with data for at least one time point; WCST, Wisconsin Card Sort Task-64: Computer Version 2 – Research Edition; BRIEF, Behavior Rating Inventory Executive Function; WISC-IV, Wechsler Intelligence Scale for Children 4th edition;  $\Sigma$ LMW, sum of metabolites of low-molecular weight phthalates;  $\Sigma$ HMW, sum of metabolites of high-molecular weight phthalates;  $\Sigma$ DEHP, sum of di(2-ethylhexyl) phthalate metabolites. Models were adjusted for maternal age at enrollment, education, country of birth, years in the U.S., depression at time of assessment; child sex, child age at time of assessment, language of assessment, HOME score, household income at time of assessment, and maternal IQ. WCST models were also adjusted for children’s video game usage.

<sup>a</sup> Separate models created for each sum of metabolites ( $\Sigma$ DEHP,  $\Sigma$ HMW,  $\Sigma$ LMW).

<sup>b</sup> (+) Higher scores indicate poorer performance/more symptomatic behavior; (-) Lower scores indicate poorer performance/more symptomatic behavior.



**Table S22.** Adjusted associations [ $\beta$  (95% CI)] of prenatal urinary phthalate biomarker concentrations (nmol/mL; log<sub>2</sub>-transformed and specific gravity-adjusted)<sup>a</sup> with behavior and social cognition outcomes at 7, 9, 10.5, 12, 14, and/or 16 years **including maternal PPVT score** using GEE models, CHAMACOS.

| Outcomes                                       | Orientation <sup>b</sup> | <i>n</i> | <i>k</i> | $\Sigma$ LMW     | $\Sigma$ HMW     | $\Sigma$ DEHP    |
|------------------------------------------------|--------------------------|----------|----------|------------------|------------------|------------------|
| <i>Social Cognition</i> <sup>c</sup>           |                          |          |          |                  |                  |                  |
| SRS Total Score                                | (+)                      | 235      | 235      | 0.4 (-0.2, 1.0)  | -0.3 (-1.2, 0.5) | -0.4 (-1.1, 0.4) |
| ENI                                            | (-)                      | 313      | 313      | 0.0 (-0.1, 0.1)  | 0.1 (-0.1, 0.2)  | 0.1 (-0.1, 0.2)  |
| NEPSY-II Affect Recognition                    | (-)                      | 308      | 308      | 0.0 (-0.3, 0.2)  | -0.2 (-0.7, 0.2) | -0.1 (-0.5, 0.2) |
| <i>Behavior</i>                                |                          |          |          |                  |                  |                  |
| BASC-2 – maternal report (T-scores)            |                          |          |          |                  |                  |                  |
| Internalizing problems                         | (+)                      | 619      | 323      | 0.5 (0.0, 1.1)   | 0.8 (-0.1, 1.8)  | 0.6 (-0.3, 1.5)  |
| Depression scale                               | (+)                      | 322      | 322      | 0.4 (-0.1, 1.0)  | 0.5 (-0.5, 1.4)  | 0.3 (-0.5, 1.1)  |
| Anxiety scale                                  | (+)                      | 313      | 313      | 0.4 (-0.3, 1.0)  | 0.8 (-0.3, 2.0)  | 0.7 (-0.4, 1.8)  |
| Externalizing problems                         | (+)                      | 612      | 323      | 0.0 (-0.5, 0.5)  | 0.4 (-0.5, 1.2)  | 0.2 (-0.5, 1.0)  |
| Hyperactivity scale                            | (+)                      | 619      | 323      | -0.1 (-0.6, 0.3) | 0.0 (-0.7, 0.7)  | -0.1 (-0.8, 0.6) |
| Attention problems scale                       | (+)                      | 619      | 323      | -0.2 (-0.7, 0.4) | -0.3 (-1.3, 0.7) | -0.2 (-1.1, 0.7) |
| BASC-2 – teacher-report (T-score) <sup>c</sup> |                          |          |          |                  |                  |                  |
| Internalizing problems                         | (+)                      | 265      | 265      | -0.7 (-1.6, 0.2) | -0.4 (-1.8, 1.0) | -0.3 (-1.6, 1.0) |
| Depression scale                               | (+)                      | 265      | 265      | -0.6 (-1.3, 0.1) | -0.2 (-1.4, 1.0) | -0.2 (-1.4, 0.9) |
| Anxiety scale                                  | (+)                      | 265      | 265      | -0.9 (-1.8, 0.1) | -0.8 (-2.1, 0.5) | -0.7 (-2.0, 0.6) |
| Externalizing problems                         | (+)                      | 265      | 265      | -0.1 (-0.8, 0.6) | 0.0 (-1.0, 1.0)  | 0.2 (-0.7, 1.1)  |
| Hyperactivity scale                            | (+)                      | 265      | 265      | 0.0 (-0.7, 0.7)  | -0.3 (-1.4, 0.9) | -0.1 (-1.1, 0.9) |
| Attention problems scale                       | (+)                      | 265      | 265      | -0.2 (-0.8, 0.3) | -0.5 (-1.4, 0.4) | -0.3 (-1.2, 0.5) |
| CADS – maternal report (T-scores)              |                          |          |          |                  |                  |                  |
| ADHD Index                                     | (+)                      | 921      | 331      | -0.3 (-0.7, 0.1) | -0.2 (-1.0, 0.5) | -0.2 (-1.0, 0.5) |
| DSM-IV Total Scale                             | (+)                      | 920      | 331      | -0.3 (-0.7, 0.1) | -0.1 (-1.0, 0.7) | -0.2 (-0.9, 0.6) |
| Inattentive Scale                              | (+)                      | 920      | 331      | -0.3 (-0.7, 0.1) | -0.2 (-1.0, 0.5) | -0.2 (-0.9, 0.4) |
| Hyperactive/impulsive scale                    | (+)                      | 920      | 331      | -0.2 (-0.7, 0.3) | 0.0 (-0.9, 0.9)  | -0.1 (-1.0, 0.7) |
| CADS – teacher-report (T-score) <sup>c</sup>   |                          |          |          |                  |                  |                  |
| ADHD Index                                     | (+)                      | 261      | 261      | -0.4 (-1.2, 0.5) | -0.5 (-1.9, 0.9) | -0.4 (-1.6, 0.9) |
| DSM-IV Total Scale                             | (+)                      | 260      | 260      | -0.2 (-0.9, 0.5) | -0.2 (-1.4, 1.0) | -0.1 (-1.2, 1.0) |

|                                                                                                                                                                                                                                                                                                                                                                                                                                                                                                                                                                                                                                                                                                                                                                                                                                                                                                                                                                                                                                                                                                                                                                                                                                                                                                                                                                                                                                                                                                                                                                           |     |  |     |     |                  |                  |                  |
|---------------------------------------------------------------------------------------------------------------------------------------------------------------------------------------------------------------------------------------------------------------------------------------------------------------------------------------------------------------------------------------------------------------------------------------------------------------------------------------------------------------------------------------------------------------------------------------------------------------------------------------------------------------------------------------------------------------------------------------------------------------------------------------------------------------------------------------------------------------------------------------------------------------------------------------------------------------------------------------------------------------------------------------------------------------------------------------------------------------------------------------------------------------------------------------------------------------------------------------------------------------------------------------------------------------------------------------------------------------------------------------------------------------------------------------------------------------------------------------------------------------------------------------------------------------------------|-----|--|-----|-----|------------------|------------------|------------------|
| Inattentive Scale                                                                                                                                                                                                                                                                                                                                                                                                                                                                                                                                                                                                                                                                                                                                                                                                                                                                                                                                                                                                                                                                                                                                                                                                                                                                                                                                                                                                                                                                                                                                                         | (+) |  | 264 | 264 | -0.2 (-0.8, 0.5) | -0.1 (-1.2, 0.8) | -0.1 (-1.0, 0.9) |
| Hyperactive/impulsive scale                                                                                                                                                                                                                                                                                                                                                                                                                                                                                                                                                                                                                                                                                                                                                                                                                                                                                                                                                                                                                                                                                                                                                                                                                                                                                                                                                                                                                                                                                                                                               | (+) |  | 264 | 264 | -0.1 (-0.8, 0.6) | -0.1 (-0.8, 0.6) | 0.2 (-0.9, 1.3)  |
| CPT-II (T-scores)                                                                                                                                                                                                                                                                                                                                                                                                                                                                                                                                                                                                                                                                                                                                                                                                                                                                                                                                                                                                                                                                                                                                                                                                                                                                                                                                                                                                                                                                                                                                                         |     |  |     |     |                  |                  |                  |
| Errors of omission                                                                                                                                                                                                                                                                                                                                                                                                                                                                                                                                                                                                                                                                                                                                                                                                                                                                                                                                                                                                                                                                                                                                                                                                                                                                                                                                                                                                                                                                                                                                                        | (+) |  | 595 | 316 | 0.9 (0.0, 1.8)   | 0.0 (-1.2, 1.1)  | -0.1 (-1.2, 1.0) |
| Errors of commission                                                                                                                                                                                                                                                                                                                                                                                                                                                                                                                                                                                                                                                                                                                                                                                                                                                                                                                                                                                                                                                                                                                                                                                                                                                                                                                                                                                                                                                                                                                                                      | (+) |  | 595 | 316 | 0.3 (-0.2, 0.9)  | -0.1 (-1.1, 0.8) | -0.3 (-1.2, 0.6) |
| ADHD confidence index                                                                                                                                                                                                                                                                                                                                                                                                                                                                                                                                                                                                                                                                                                                                                                                                                                                                                                                                                                                                                                                                                                                                                                                                                                                                                                                                                                                                                                                                                                                                                     | (+) |  | 596 | 316 | 0.7 (-0.4, 1.9)  | -0.9 (-2.7, 0.8) | -1.0 (-2.6, 0.7) |
| <p><i>Abbreviations:</i> <i>n</i>, number of observations from all time points; <i>k</i>, number of children with data for at least one time point; SRS, Social Responsiveness Scale, Version 2; ENI, Evaluación Neuropsicológica del Niño; BASC-2, Behavior Assessment System for Children, 2nd edition; CADS, Conners' ADHD/DSM-IV Scales; ADHD, Attention Deficit Hyperactivity Disorder; DSM-IV, Diagnostic and Statistical Manual of Mental Disorders, 4th Edition; CPT-II, Continuous Performance Test, 2nd edition; <math>\Sigma</math>LMW, sum of metabolites of low-molecular weight phthalates; <math>\Sigma</math>HMW, sum of metabolites of high-molecular weight phthalates; <math>\Sigma</math>DEHP, sum of di(2-ethylhexyl) phthalate metabolites.</p> <p>Models were adjusted for maternal age at enrollment, education, country of birth, years in the U.S., depression at time of assessment; child sex, child age at time of assessment, language of assessment, HOME score, household income at time of assessment, and maternal IQ. CPT-II models were also adjusted for children's video game usage at time of assessment.</p> <p><sup>a</sup> Separate models created for each sum of metabolites (<math>\Sigma</math>DEHP, <math>\Sigma</math>HMW, <math>\Sigma</math>LMW).</p> <p><sup>b</sup> (+) Higher scores indicate poorer performance/more symptomatic behavior; (-) Lower scores indicate poorer performance/more symptomatic behavior.</p> <p><sup>c</sup> Outcomes measured at one time point and modeled using linear regression.</p> |     |  |     |     |                  |                  |                  |

**Table S23.** Adjusted associations [ $\beta$  (95% CI)] of prenatal urinary phthalate biomarker concentrations (nmol/mL; log<sub>2</sub>-transformed and specific gravity-adjusted)<sup>a</sup> with self-reported BASC-2 behavior outcomes at 10.5, 14, and 16 years **including maternal PPVT score** using linear regression models, CHAMACOS.

| Outcome                  | Orientation <sup>b</sup> | <i>n</i> | $\Sigma$ LMW    | $\Sigma$ HMW     | $\Sigma$ DEHP    |
|--------------------------|--------------------------|----------|-----------------|------------------|------------------|
| 10.5-year assessment     |                          |          |                 |                  |                  |
| Internalizing problems   | (+)                      | -        | -               | -                | -                |
| Depression scale         | (+)                      | 289      | 0.5 (-0.1, 1.1) | 0.7 (-0.5, 1.9)  | 0.6 (-0.5, 1.7)  |
| Anxiety scale            | (+)                      | 289      | 0.3 (-0.3, 1.0) | 0.5 (-0.5, 1.4)  | 0.4 (-0.5, 1.3)  |
| Externalizing problems   |                          |          |                 |                  |                  |
| Hyperactivity scale      | (+)                      | 299      | 0.2 (-0.4, 0.8) | 0.6 (-0.5, 1.6)  | 0.4 (-0.6, 1.4)  |
| Attention problems scale | (+)                      | 290      | 0.1 (-0.6, 0.8) | 0.0 (-1.0, 1.0)  | 0.1 (-0.9, 1.0)  |
| 14-year assessment       |                          |          |                 |                  |                  |
| Internalizing problems   | (+)                      | -        | -               | -                | -                |
| Depression scale         | (+)                      | 301      | 0.6 (-0.1, 1.2) | 0.7 (-0.6, 1.9)  | 0.5 (-0.6, 1.6)  |
| Anxiety scale            | (+)                      | 300      | 0.5 (-0.2, 1.1) | -0.3 (-1.2, 0.7) | -0.3 (-1.3, 0.6) |
| Externalizing problems   |                          |          |                 |                  |                  |
| Hyperactivity scale      | (+)                      | -        | -               | -                | -                |
| Attention problems scale | (+)                      | -        | -               | -                | -                |
| 16-year assessment       |                          |          |                 |                  |                  |
| Internalizing problems   | (+)                      | 283      | 1.2 (0.4, 2.0)  | 0.4 (-0.6, 1.4)  | 0.4 (-0.5, 1.3)  |
| Depression scale         | (+)                      | 286      | 0.8 (0.0, 1.6)  | 0.3 (-0.8, 1.3)  | 0.3 (-0.6, 1.3)  |
| Anxiety scale            | (+)                      | 286      | 0.9 (0.0, 1.8)  | 0.7 (-0.4, 1.9)  | 0.6 (-0.4, 1.7)  |
| Externalizing problems   |                          |          |                 |                  |                  |
| Hyperactivity scale      | (+)                      | 285      | 0.8 (0.1, 1.5)  | 0.0 (-1.0, 1.1)  | -0.2 (-1.1, 0.8) |
| Attention problems scale | (+)                      | 286      | 1.5 (0.8, 2.3)  | -0.2 (-1.1, 0.8) | -0.2 (-1.1, 0.7) |

*Abbreviations:* BASC-2, Behavior Assessment System for Children, 2nd edition; *n*, number of observations; *k*, number of children;  $\Sigma$ LMW, sum of metabolites of low-molecular weight phthalates;  $\Sigma$ HMW, sum of metabolites of high-molecular weight phthalates;  $\Sigma$ DEHP, sum of di(2-ethylhexyl) phthalate metabolites.

Models were adjusted for maternal age at enrollment, education, country of birth, years in the U.S., depression at time of assessment; child sex, child age at time of assessment, language of assessment, HOME score, and household income at time of assessment.

<sup>a</sup> Separate models created for each sum of metabolites ( $\Sigma$ DEHP,  $\Sigma$ HMW,  $\Sigma$ LMW).

<sup>b</sup> (+) Higher scores indicate poorer performance/more symptomatic behavior; (-) Lower scores indicate poorer performance/more symptomatic behavior.

**Table S24.** Adjusted associations [ $\beta$  (95% CI)] of prenatal urinary phthalate biomarker concentrations (nmol/mL; log<sub>2</sub>-transformed and specific gravity-adjusted)<sup>a</sup> with executive function and cognition outcomes at 7, 9, 10.5, 12, 14, and/or 16 years **including breastfeeding** using GEE models, CHAMACOS.

| Outcomes                           | Orientation <sup>b</sup> | <i>n</i> | <i>k</i> | $\Sigma$ LMW     | $\Sigma$ HMW     | $\Sigma$ DEHP    |
|------------------------------------|--------------------------|----------|----------|------------------|------------------|------------------|
| <i>Executive function</i>          |                          |          |          |                  |                  |                  |
| WCST                               |                          |          |          |                  |                  |                  |
| Errors (T-scores)                  | (-)                      | 593      | 317      | 0.2 (-0.4, 0.8)  | 0.5 (-0.4, 1.4)  | 0.5 (-0.3, 1.3)  |
| Preservative Errors (T-scores)     | (-)                      | 593      | 317      | 0.7 (-0.1, 1.4)  | 0.7 (-0.6, 1.9)  | 0.6 (-0.5, 1.8)  |
| BRIEF – maternal report (T-scores) |                          |          |          |                  |                  |                  |
| Behavioral Regulation Index        | (+)                      | 922      | 331      | 0.1 (-0.4, 0.7)  | 0.1 (-0.8, 1.0)  | 0.0 (-0.8, 0.8)  |
| Metacognition Index                | (+)                      | 921      | 330      | -0.4 (-0.9, 0.1) | -0.1 (-1.0, 0.9) | -0.1 (-1.0, 0.7) |
| Global Executive Composite         | (+)                      | 922      | 331      | -0.2 (-0.8, 0.3) | 0.0 (-0.9, 1.0)  | -0.1 (-0.9, 0.8) |
| NEPSY Tower                        | (-)                      | 313      | 313      | 0.1 (-0.1, 0.3)  | 0.1 (-0.2, 0.4)  | 0.1 (-0.2, 0.4)  |
| <i>Cognition</i>                   |                          |          |          |                  |                  |                  |
| WISC-IV (scaled scores)            |                          |          |          |                  |                  |                  |
| Full Scale IQ                      | (-)                      | 589      | 321      | -0.2 (-1.0, 0.6) | 0.0 (-1.4, 1.4)  | 0.1 (-1.3, 1.4)  |
| Verbal comprehension IQ            | (-)                      | 621      | 324      | -0.4 (-1.1, 0.4) | -0.3 (-1.6, 1.0) | -0.3 (-1.5, 0.9) |
| Perceptual reasoning IQ            | (-)                      | 621      | 324      | 0.2 (-0.7, 1.2)  | 0.4 (-1.1, 1.9)  | 0.3 (-1.1, 1.7)  |
| Working memory IQ                  | (-)                      | 593      | 323      | -0.7 (-1.4, 0.1) | -0.1 (-1.5, 1.2) | -0.1 (-1.4, 1.2) |
| Processing speed IQ                | (-)                      | 593      | 323      | 0.2 (-0.4, 0.9)  | 0.5 (-0.7, 1.7)  | 0.5 (-0.6, 1.7)  |

*Abbreviations:* *n*, number of observations from all time points; *k*, number of children with data for at least one time point; WCST, Wisconsin Card Sort Task-64: Computer Version 2 – Research Edition; BRIEF, Behavior Rating Inventory Executive Function; WISC-IV, Wechsler Intelligence Scale for Children 4th edition;  $\Sigma$ LMW, sum of metabolites of low-molecular weight phthalates;  $\Sigma$ HMW, sum of metabolites of high-molecular weight phthalates;  $\Sigma$ DEHP, sum of di(2-ethylhexyl) phthalate metabolites.

Models were adjusted for maternal age at enrollment, education, country of birth, years in the U.S., depression at time of assessment; child sex, child age at time of assessment, language of assessment, HOME score, household income at time of assessment, and breastfeeding. WCST models were also adjusted for children’s video game usage.

<sup>a</sup> Separate models created for each sum of metabolites ( $\Sigma$ DEHP,  $\Sigma$ HMW,  $\Sigma$ LMW).

<sup>b</sup> (+) Higher scores indicate poorer performance/more symptomatic behavior; (-) Lower scores indicate poorer performance/more symptomatic behavior.

**Table S25.** Adjusted associations [ $\beta$  (95% CI)] of prenatal urinary phthalate biomarker concentrations (nmol/mL; log<sub>2</sub>-transformed and specific gravity-adjusted)<sup>a</sup> with behavior and social cognition outcomes at 7, 9, 10.5, 12, 14, and/or 16 years including breastfeeding using GEE models, CHAMACOS.

| Outcomes                                       | Orientation <sup>b</sup> | <i>n</i> | <i>k</i> | ΣLMW             | ΣHMW             | ΣDEHP            |
|------------------------------------------------|--------------------------|----------|----------|------------------|------------------|------------------|
| <i>Social Cognition</i> <sup>c</sup>           |                          |          |          |                  |                  |                  |
| SRS Total Score                                | (+)                      | 235      | 235      | 0.5 (-0.1, 1.1)  | -0.3 (-1.1, 0.6) | -0.3 (-1.1, 0.5) |
| ENI                                            | (-)                      | 313      | 313      | 0.0 (-0.1, 0.1)  | 0.1 (-0.1, 0.2)  | 0.1 (-0.1, 0.2)  |
| NEPSY-II Affect Recognition                    | (-)                      | 308      | 308      | 0.0 (-0.3, 0.2)  | -0.3 (-0.7, 0.1) | -0.2 (-0.6, 0.2) |
| <i>Behavior</i>                                |                          |          |          |                  |                  |                  |
| BASC-2 – maternal report (T-scores)            |                          |          |          |                  |                  |                  |
| Internalizing problems                         | (+)                      | 619      | 323      | 0.6 (0.0, 1.1)   | 0.6 (0.0, 1.1)   | 0.6 (-0.3, 1.5)  |
| Depression scale                               | (+)                      | 322      | 322      | 0.5 (-0.1, 1.1)  | 0.5 (-0.4, 1.4)  | 0.3 (-0.5, 1.1)  |
| Anxiety scale                                  | (+)                      | 313      | 313      | 0.4 (-0.3, 1.0)  | 0.8 (-0.4, 1.9)  | 0.6 (-0.4, 1.7)  |
| Externalizing problems                         | (+)                      | 612      | 323      | 0.0 (-0.5, 0.5)  | 0.3 (-0.5, 1.1)  | 0.3 (-0.5, 1.1)  |
| Hyperactivity <sup>f</sup>                     | (+)                      | 619      | 323      | -0.1 (-0.6, 0.3) | 0.0 (-0.8, 0.7)  | 0.0 (-0.8, 0.7)  |
| Attention problems                             | (+)                      | 619      | 323      | -0.2 (-0.8, 0.4) | -0.3 (-1.3, 0.6) | -0.2 (-1.2, 0.7) |
| BASC-2 – teacher-report (T-score) <sup>c</sup> |                          |          |          |                  |                  |                  |
| Internalizing problems                         | (+)                      | 265      | 265      | -0.7 (-1.6, 0.2) | -0.4 (-1.8, 1.0) | -0.3 (-1.6, 1.0) |
| Depression scale                               | (+)                      | 265      | 265      | -0.6 (-1.4, 0.1) | -0.2 (-1.4, 0.9) | -0.2 (-1.4, 0.9) |
| Anxiety scale                                  | (+)                      | 265      | 265      | -0.9 (-1.8, 0.1) | -0.8 (-2.1, 0.6) | -0.7 (-2.0, 0.6) |
| Externalizing problems                         | (+)                      | 265      | 265      | -0.1 (-0.8, 0.6) | 0.0 (-1.0, 1.0)  | 0.2 (-0.7, 1.1)  |
| Hyperactivity scale                            | (+)                      | 265      | 265      | 0.0 (-0.7, 0.7)  | -0.2 (-1.4, 0.9) | -0.1 (-1.1, 0.9) |
| Attention problems scale                       | (+)                      | 265      | 265      | -0.2 (-0.8, 0.4) | -0.5 (-1.4, 0.4) | -0.3 (-1.2, 0.5) |
| CADS – maternal report (T-scores)              |                          |          |          |                  |                  |                  |
| ADHD Index                                     | (+)                      | 921      | 331      | -0.3 (-0.7, 0.1) | -0.2 (-1.0, 0.5) | -0.2 (-1.0, 0.5) |
| DSM-IV Total Scale                             | (+)                      | 920      | 331      | -0.1 (-1.0, 0.7) | -0.1 (-1.0, 0.7) | -0.2 (-0.9, 0.6) |
| Inattentive Scale                              | (+)                      | 920      | 331      | -0.3 (-0.7, 0.1) | -0.3 (-0.7, 0.1) | -0.3 (-0.9, 0.4) |
| Hyperactive/impulsive scale                    | (+)                      | 920      | 331      | -0.2 (-0.7, 0.3) | 0.0 (-0.9, 0.9)  | -0.1 (-1.0, 0.7) |
| CADS – teacher-report (T-score) <sup>c</sup>   |                          |          |          |                  |                  |                  |
| ADHD Index                                     | (+)                      | 261      | 261      | -0.3 (-1.2, 0.5) | -0.5 (-1.9, 0.9) | -0.3 (-1.6, 1.0) |
| DSM-IV Total Scale                             | (+)                      | 260      | 260      | -0.2 (-0.9, 0.5) | -0.2 (-1.3, 1.0) | -0.1 (-1.2, 1.0) |
| Inattentive Scale                              | (+)                      | 264      | 264      | -0.1 (-0.8, 0.5) | -0.1 (-1.2, 0.9) | -0.1 (-1.0, 0.9) |
| Hyperactive/impulsive scale                    | (+)                      | 264      | 264      | 0.0 (-0.7, 0.7)  | 0.1 (-1.1, 1.3)  | 0.2 (-0.9, 1.3)  |

|                       |     |     |     |                 |  |                  |                  |
|-----------------------|-----|-----|-----|-----------------|--|------------------|------------------|
| CPT-II (T-scores)     |     |     |     |                 |  |                  |                  |
| Errors of omission    | (+) | 595 | 316 | 0.9 (0.0, 1.8)  |  | -0.1 (-1.2, 1.1) | -0.2 (-1.3, 0.9) |
| Errors of commission  | (+) | 595 | 316 | 0.3 (-0.3, 0.8) |  | -0.1 (-1.0, 0.8) | -0.3 (-1.1, 0.6) |
| ADHD confidence index | (+) | 596 | 316 | 0.8 (-0.4, 1.9) |  | -1.0 (-2.7, 0.8) | -1.0 (-2.6, 0.6) |

*Abbreviations:* *n*, number of observations from all time points; *k*, number of children with data for at least one time point; SRS, Social Responsiveness Scale, Version 2; ENI, Evaluación Neuropsicológica del Niño; BASC-2, Behavior Assessment System for Children, 2nd edition; CADS, Conners' ADHD/DSM-IV Scales; ADHD, Attention Deficit Hyperactivity Disorder; DSM-IV, Diagnostic and Statistical Manual of Mental Disorders, 4th Edition; CPT-II, Continuous Performance Test, 2nd edition;  $\Sigma$ LMW, sum of metabolites of low-molecular weight phthalates;  $\Sigma$ HMW, sum of metabolites of high-molecular weight phthalates;  $\Sigma$ DEHP, sum of di(2-ethylhexyl) phthalate metabolites.

Models were adjusted for maternal age at enrollment, education, country of birth, years in the U.S., depression at time of assessment; child sex, child age at time of assessment, language of assessment, HOME score, household income at time of assessment, and breastfeeding. CPT-II models were also adjusted for children's video game usage at time of assessment.

<sup>a</sup> Separate models created for each sum of metabolites ( $\Sigma$ DEHP,  $\Sigma$ HMW,  $\Sigma$ LMW).

<sup>b</sup> (+) Higher scores indicate poorer performance/more symptomatic behavior; (-) Lower scores indicate poorer performance/more symptomatic behavior.

<sup>c</sup> Outcomes measured at one time point and modeled using linear regression.

**Table S26.** Adjusted associations [ $\beta$  (95% CI)] of prenatal urinary phthalate biomarker concentrations (nmol/mL; log<sub>2</sub>-transformed and specific gravity-adjusted)<sup>a</sup> with self-reported BASC-2 behavior outcomes at 10.5, 14, and 16 years **including breastfeeding** using linear regression models, CHAMACOS.

| Outcome                  | Orientation <sup>b</sup> | <i>n</i> | $\Sigma$ LMW    | $\Sigma$ HMW     | $\Sigma$ DEHP    |
|--------------------------|--------------------------|----------|-----------------|------------------|------------------|
| 10.5-year assessment     |                          |          |                 |                  |                  |
| Internalizing problems   | (+)                      | -        | -               | -                | -                |
| Depression scale         | (+)                      | 289      | 0.5 (-0.2, 1.1) | 0.7 (-0.5, 1.8)  | 0.6 (-0.6, 1.7)  |
| Anxiety scale            | (+)                      | 289      | 0.3 (-0.4, 0.9) | 0.5 (-0.5, 1.4)  | 0.4 (-0.5, 1.3)  |
| Externalizing problems   |                          |          |                 |                  |                  |
| Hyperactivity scale      | (+)                      | 299      | 0.2 (-0.4, 0.8) | 0.6 (-0.5, 1.6)  | 0.4 (-0.6, 1.4)  |
| Attention problems scale | (+)                      | 290      | 0.1 (-0.6, 0.8) | 0.0 (-1.0, 1.0)  | 0.1 (-0.9, 1.0)  |
| 14-year assessment       |                          |          |                 |                  |                  |
| Internalizing problems   | (+)                      | -        | -               | -                | -                |
| Depression scale         | (+)                      | 301      | 0.6 (-0.1, 1.2) | 0.6 (-0.6, 1.8)  | 0.5 (-0.7, 1.6)  |
| Anxiety scale            | (+)                      | 300      | 0.4 (-0.2, 1.1) | -0.3 (-1.3, 0.7) | -0.4 (-1.3, 0.6) |
| Externalizing problems   |                          |          |                 |                  |                  |
| Hyperactivity scale      | (+)                      | -        | -               | -                | -                |
| Attention problems scale | (+)                      | -        | -               | -                | -                |
| 16-year assessment       |                          |          |                 |                  |                  |
| Internalizing problems   | (+)                      | 283      | 1.2 (0.4, 2.0)  | 0.3 (-0.7, 1.4)  | 0.3 (-0.6, 1.3)  |
| Depression scale         | (+)                      | 286      | 0.7 (0.0, 1.5)  | 0.2 (-0.8, 1.2)  | 0.3 (-0.7, 1.2)  |
| Anxiety scale            | (+)                      | 286      | 0.9 (0.0, 1.8)  | 0.7 (-0.5, 1.8)  | 0.6 (-0.5, 1.6)  |
| Externalizing problems   |                          |          |                 |                  |                  |
| Hyperactivity scale      | (+)                      | 285      | 0.8 (0.1, 1.4)  | 0.0 (-1.1, 1.0)  | -0.2 (-1.2, 0.8) |
| Attention problems scale | (+)                      | 286      | 1.5 (0.7, 2.2)  | -0.2 (-1.2, 0.8) | -0.3 (-1.2, 0.6) |

*Abbreviations:* BASC-2, Behavior Assessment System for Children, 2nd edition; *n*, number of observations; *k*, number of children;  $\Sigma$ LMW, sum of metabolites of low-molecular weight phthalates;  $\Sigma$ HMW, sum of metabolites of high-molecular weight phthalates;  $\Sigma$ DEHP, sum of di(2-ethylhexyl) phthalate metabolites.

Models were adjusted for maternal age at enrollment, education, country of birth, years in the U.S., depression at time of assessment; child sex, child age at time of assessment, language of assessment, HOME score, and household income at time of assessment.

<sup>a</sup> Separate models created for each sum of metabolites ( $\Sigma$ DEHP,  $\Sigma$ HMW,  $\Sigma$ LMW).

<sup>b</sup> (+) Higher scores indicate poorer performance/more symptomatic behavior; (-) Lower scores indicate poorer performance/more symptomatic behavior.

**Table S27.** Adjusted associations [ $\beta$  (95% CI)] of prenatal urinary phthalate biomarker concentrations (nmol/mL; log<sub>2</sub>-transformed and specific gravity-adjusted)<sup>a</sup> with executive function and cognition outcomes at 7, 9, 10.5, 12, 14, and/or 16 years including prenatal PBDE exposure using GEE models, CHAMACOS.

| Outcomes                                                                                                                                                                                                                                                                                                                                                                                                                                                                                                                                                                                                                                                                                                                                                                                                                                                                                                                                                                                                                                                                                                                                                                                                                                                                        | Orientation <sup>b</sup> | <i>n</i> | <i>k</i> | $\Sigma$ LMW     | $\Sigma$ HMW     | $\Sigma$ DEHP    |
|---------------------------------------------------------------------------------------------------------------------------------------------------------------------------------------------------------------------------------------------------------------------------------------------------------------------------------------------------------------------------------------------------------------------------------------------------------------------------------------------------------------------------------------------------------------------------------------------------------------------------------------------------------------------------------------------------------------------------------------------------------------------------------------------------------------------------------------------------------------------------------------------------------------------------------------------------------------------------------------------------------------------------------------------------------------------------------------------------------------------------------------------------------------------------------------------------------------------------------------------------------------------------------|--------------------------|----------|----------|------------------|------------------|------------------|
| <i>Executive function</i>                                                                                                                                                                                                                                                                                                                                                                                                                                                                                                                                                                                                                                                                                                                                                                                                                                                                                                                                                                                                                                                                                                                                                                                                                                                       |                          |          |          |                  |                  |                  |
| WCST                                                                                                                                                                                                                                                                                                                                                                                                                                                                                                                                                                                                                                                                                                                                                                                                                                                                                                                                                                                                                                                                                                                                                                                                                                                                            |                          |          |          |                  |                  |                  |
| Errors (T-scores)                                                                                                                                                                                                                                                                                                                                                                                                                                                                                                                                                                                                                                                                                                                                                                                                                                                                                                                                                                                                                                                                                                                                                                                                                                                               | (-)                      | 468      | 251      | 0.2 (-0.4, 0.9)  | 0.6 (-0.4, 1.7)  | 0.5 (-0.5, 1.5)  |
| Preservative Errors (T-scores)                                                                                                                                                                                                                                                                                                                                                                                                                                                                                                                                                                                                                                                                                                                                                                                                                                                                                                                                                                                                                                                                                                                                                                                                                                                  | (-)                      | 468      | 251      | 0.8 (-0.1, 1.6)  | 1.0 (-0.5, 2.4)  | 0.9 (-0.5, 2.2)  |
| BRIEF – maternal report (T-scores)                                                                                                                                                                                                                                                                                                                                                                                                                                                                                                                                                                                                                                                                                                                                                                                                                                                                                                                                                                                                                                                                                                                                                                                                                                              |                          |          |          |                  |                  |                  |
| Behavioral Regulation Index                                                                                                                                                                                                                                                                                                                                                                                                                                                                                                                                                                                                                                                                                                                                                                                                                                                                                                                                                                                                                                                                                                                                                                                                                                                     | (+)                      | 728      | 263      | 0.1 (-0.5, 0.7)  | 0.2 (-0.9, 1.3)  | 0.1 (-0.8, 1.1)  |
| Metacognition Index                                                                                                                                                                                                                                                                                                                                                                                                                                                                                                                                                                                                                                                                                                                                                                                                                                                                                                                                                                                                                                                                                                                                                                                                                                                             | (+)                      | 727      | 262      | -0.3 (-0.9, 0.2) | 0.0 (-1.1, 1.1)  | 0.0 (-1.0, 1.0)  |
| Global Executive Composite                                                                                                                                                                                                                                                                                                                                                                                                                                                                                                                                                                                                                                                                                                                                                                                                                                                                                                                                                                                                                                                                                                                                                                                                                                                      | (+)                      | 728      | 263      | -0.1 (-0.7, 0.4) | 0.1 (-1.0, 1.2)  | 0.0 (-1.0, 1.0)  |
| NEPSY Tower                                                                                                                                                                                                                                                                                                                                                                                                                                                                                                                                                                                                                                                                                                                                                                                                                                                                                                                                                                                                                                                                                                                                                                                                                                                                     | (-)                      | 246      | 246      | 0.2 (-0.1, 0.4)  | 0.1 (-0.2, 0.5)  | 0.9 (-0.3, 0.4)  |
| <i>Cognition</i>                                                                                                                                                                                                                                                                                                                                                                                                                                                                                                                                                                                                                                                                                                                                                                                                                                                                                                                                                                                                                                                                                                                                                                                                                                                                |                          |          |          |                  |                  |                  |
| WISC-IV (scaled scores)                                                                                                                                                                                                                                                                                                                                                                                                                                                                                                                                                                                                                                                                                                                                                                                                                                                                                                                                                                                                                                                                                                                                                                                                                                                         |                          |          |          |                  |                  |                  |
| Full-Scale IQ                                                                                                                                                                                                                                                                                                                                                                                                                                                                                                                                                                                                                                                                                                                                                                                                                                                                                                                                                                                                                                                                                                                                                                                                                                                                   | (-)                      | 461      | 254      | -0.2 (-1.1, 0.7) | 0.1 (-1.6, 1.8)  | 0.1 (-1.5, 1.7)  |
| Verbal comprehension IQ                                                                                                                                                                                                                                                                                                                                                                                                                                                                                                                                                                                                                                                                                                                                                                                                                                                                                                                                                                                                                                                                                                                                                                                                                                                         | (-)                      | 488      | 257      | -0.2 (-1.0, 0.7) | -0.5 (-2.1, 1.2) | -0.4 (-2.0, 1.1) |
| Perceptual reasoning IQ                                                                                                                                                                                                                                                                                                                                                                                                                                                                                                                                                                                                                                                                                                                                                                                                                                                                                                                                                                                                                                                                                                                                                                                                                                                         | (-)                      | 488      | 257      | 0.0 (-1.1, 1.1)  | 0.6 (-1.2, 2.3)  | 0.5 (-1.2, 2.1)  |
| Working memory IQ                                                                                                                                                                                                                                                                                                                                                                                                                                                                                                                                                                                                                                                                                                                                                                                                                                                                                                                                                                                                                                                                                                                                                                                                                                                               | (-)                      | 464      | 256      | -0.6 (-1.4, 0.2) | -0.4 (-1.9, 1.1) | -0.3 (-1.7, 1.2) |
| Processing speed IQ                                                                                                                                                                                                                                                                                                                                                                                                                                                                                                                                                                                                                                                                                                                                                                                                                                                                                                                                                                                                                                                                                                                                                                                                                                                             | (-)                      | 465      | 256      | 0.3 (-0.4, 1.0)  | 1.0 (-0.4, 2.5)  | 1.0 (-0.4, 2.4)  |
| <p><i>Abbreviations:</i> <i>n</i>, number of observations from all time points; <i>k</i>, number of children with data for at least one time point; WCST, Wisconsin Card Sort Task-64: Computer Version 2 – Research Edition; BRIEF, Behavior Rating Inventory Executive Function; WISC-IV, Wechsler Intelligence Scale for Children 4th edition; <math>\Sigma</math>LMW, sum of metabolites of low-molecular weight phthalates; <math>\Sigma</math>HMW, sum of metabolites of high-molecular weight phthalates; <math>\Sigma</math>DEHP, sum of di(2-ethylhexyl) phthalate metabolites. Models were adjusted for maternal age at enrollment, education, country of birth, years in the U.S., depression at time of assessment; child sex, child age at time of assessment, language of assessment, HOME score, household income at time of assessment, and prenatal PBDE exposure. WCST models were also adjusted for children’s video game usage.</p> <p><sup>a</sup> Separate models created for each sum of metabolites (<math>\Sigma</math>DEHP, <math>\Sigma</math>HMW, <math>\Sigma</math>LMW).</p> <p><sup>b</sup> (+) Higher scores indicate poorer performance/more symptomatic behavior; (-) Lower scores indicate poorer performance/more symptomatic behavior.</p> |                          |          |          |                  |                  |                  |



**Table S28.** Adjusted associations [ $\beta$  (95% CI)] of prenatal urinary phthalate biomarker concentrations (nmol/mL; log<sub>2</sub>-transformed and specific gravity-adjusted)<sup>a</sup> with behavior and social cognition outcomes at 7, 9, 10.5, 12, 14, and/or 16 years including prenatal PBDE exposures using GEE models, CHAMACOS.

| Outcomes                                       | Orientation <sup>b</sup> | <i>n</i> | <i>k</i> | $\Sigma$ LMW     | $\Sigma$ HMW     | $\Sigma$ DEHP    |
|------------------------------------------------|--------------------------|----------|----------|------------------|------------------|------------------|
| <i>Social Cognition</i> <sup>c</sup>           |                          |          |          |                  |                  |                  |
| SRS Total Score                                | (+)                      | 174      | 174      | 0.7 (-0.1, 1.3)  | 0.0 (-1.1, 0.9)  | -0.1 (-1.1, 0.8) |
| ENI                                            | (-)                      | 246      | 246      | 0.0 (-0.1, 0.1)  | 0.0 (-0.2, 0.1)  | 0.0 (-0.1, 0.1)  |
| NEPSY-II Affect Recognition                    | (-)                      | 243      | 243      | 0.0 (-0.3, 0.2)  | -0.3 (-0.8, 0.2) | -0.2 (-0.6, 0.3) |
| <i>Behavior</i>                                |                          |          |          |                  |                  |                  |
| BASC-2 – maternal report (T-scores)            |                          |          |          |                  |                  |                  |
| Internalizing problems                         | (+)                      | 486      | 256      | 0.5 (-0.1, 1.1)  | 0.8 (-0.3, 2.0)  | 0.7 (-0.4, 1.8)  |
| Depression scale                               | (+)                      | 254      | 254      | 0.4 (-0.2, 1.0)  | 0.6 (-0.4, 1.7)  | 0.5 (-0.5, 1.5)  |
| Anxiety scale                                  | (+)                      | 246      | 246      | 0.4 (-0.4, 1.1)  | 1.0 (-0.4, 2.4)  | 0.9 (-0.4, 2.2)  |
| Externalizing problems                         | (+)                      | 482      | 256      | -0.1 (-0.6, 0.4) | -0.1 (-0.9, 0.8) | -0.2 (-1.0, 0.6) |
| Hyperactivity                                  | (+)                      | 486      | 256      | -0.2 (-0.7, 0.3) | -0.4 (-1.2, 0.4) | -0.5 (-1.2, 0.2) |
| Attention problems                             | (+)                      | 486      | 256      | -0.2 (-0.8, 0.4) | -0.6 (-1.7, 0.5) | -0.5 (-1.5, 0.5) |
| BASC-2 – teacher-report (T-score) <sup>c</sup> |                          |          |          |                  |                  |                  |
| Internalizing problems                         | (+)                      | 208      | 208      | -0.7 (-1.7, 0.3) | -0.6 (-2.1, 1.0) | -0.5 (-1.9, 1.0) |
| Depression scale                               | (+)                      | 208      | 208      | -0.5 (-1.3, 0.3) | -0.8 (-1.9, 0.3) | -0.8 (-1.9, 0.2) |
| Anxiety scale                                  | (+)                      | 208      | 208      | -0.8 (-1.9, 0.2) | -0.7 (-2.3, 0.8) | -0.6 (-2.1, 0.8) |
| Externalizing problems                         | (+)                      | 208      | 208      | -0.1 (-0.8, 0.6) | -0.4 (-1.5, 0.8) | -0.3 (-1.3, 0.8) |
| Hyperactivity scale                            | (+)                      | 208      | 208      | 0.1 (-0.7, 0.8)  | -0.6 (-1.9, 0.7) | -0.5 (-1.7, 0.7) |
| Attention problems scale                       | (+)                      | 208      | 208      | -0.2 (-0.8, 0.4) | -0.5 (-1.5, 0.6) | -0.3 (-1.3, 0.7) |
| CADS – maternal report (T-scores)              |                          |          |          |                  |                  |                  |
| ADHD Index                                     | (+)                      | 727      | 263      | -0.3 (-0.7, 0.2) | -0.4 (-1.3, 0.6) | -0.3 (-1.2, 0.5) |
| DSM-IV Total Scale                             | (+)                      | 726      | 263      | -0.1 (-0.6, 0.3) | -0.1 (-1.1, 0.8) | -0.2 (-1.0, 0.7) |
| Inattentive Scale                              | (+)                      | 726      | 263      | -0.2 (-0.6, 0.2) | -0.2 (-1.0, 0.7) | -0.2 (-0.9, 0.6) |
| Hyperactive/impulsive scale                    | (+)                      | 726      | 263      | 0.0 (-0.5, 0.5)  | -0.1 (-1.1, 0.9) | -0.2 (-1.2, 0.7) |
| CADS – teacher-report (T-score) <sup>c</sup>   |                          |          |          |                  |                  |                  |
| ADHD Index                                     | (+)                      | 204      | 204      | -0.3 (-1.2, 0.6) | -0.6 (-2.2, 1.0) | -0.5 (-2.0, 0.9) |
| DSM-IV Total Scale                             | (+)                      | 203      | 203      | -0.1 (-0.9, 0.6) | -0.1 (-1.5, 1.2) | -0.1 (-1.4, 1.1) |
| Inattentive Scale                              | (+)                      | 207      | 207      | -0.1 (-0.8, 0.6) | 0.1 (-1.0, 1.2)  | 0.1 (-0.9, 1.1)  |
| Hyperactive/impulsive scale                    | (+)                      | 207      | 207      | 0.0 (-0.8, 0.8)  | -0.2 (-1.6, 1.2) | -0.2 (-1.5, 1.1) |

|                       |     |     |     |                 |  |                  |  |                   |
|-----------------------|-----|-----|-----|-----------------|--|------------------|--|-------------------|
| CPT-II (T-scores)     |     |     |     |                 |  |                  |  |                   |
| Errors of omission    | (+) | 468 | 250 | 1.0 (0.0, 2.0)  |  | -0.5 (-1.7, 0.6) |  | -0.7 (-1.8, 0.4)  |
| Errors of commission  | (+) | 468 | 250 | 0.3 (-0.3, 1.0) |  | 0.7 (-0.3, 1.7)  |  | 0.5 (-0.5, 1.4)   |
| ADHD confidence index | (+) | 469 | 250 | 0.8 (-0.5, 2.1) |  | -1.7 (-3.6, 0.1) |  | -1.8 (-3.5, -0.1) |

*Abbreviations:* *n*, number of observations from all time points; *k*, number of children with data for at least one time point; SRS, Social Responsiveness Scale, Version 2; ENI, Evaluación Neuropsicológica del Niño; BASC-2, Behavior Assessment System for Children, 2nd edition; CADS, Conners' ADHD/DSM-IV Scales; ADHD, Attention Deficit Hyperactivity Disorder; DSM-IV, Diagnostic and Statistical Manual of Mental Disorders, 4th Edition; CPT-II, Continuous Performance Test, 2nd edition;  $\Sigma$ LMW, sum of metabolites of low-molecular weight phthalates;  $\Sigma$ HMW, sum of metabolites of high-molecular weight phthalates;  $\Sigma$ DEHP, sum of di(2-ethylhexyl) phthalate metabolites.

Models were adjusted for maternal age at enrollment, education, country of birth, years in the U.S., depression at time of assessment; child sex, child age at time of assessment, language of assessment, HOME score, household income at time of assessment, and prenatal PBDE exposure. CPT-II models were also adjusted for children's video game usage at time of assessment.

<sup>a</sup> Separate models created for each sum of metabolites ( $\Sigma$ DEHP,  $\Sigma$ HMW,  $\Sigma$ LMW).

<sup>b</sup> (+) Higher scores indicate poorer performance/more symptomatic behavior; (-) Lower scores indicate poorer performance/more symptomatic behavior.

<sup>c</sup> Outcomes measured at one time point and modeled using linear regression.

**Table S29.** Adjusted associations [ $\beta$  (95% CI)] of prenatal urinary phthalate biomarker concentrations (nmol/mL; log<sub>2</sub>-transformed and specific gravity-adjusted)<sup>a</sup> with self-reported BASC-2 behavior outcomes at 10.5, 14, and 16 years **including prenatal PBDE exposures** using linear regression models, CHAMACOS.

| Outcome                  | Orientation <sup>b</sup> | <i>n</i> | $\Sigma$ LMW    | $\Sigma$ HMW     | $\Sigma$ DEHP    |
|--------------------------|--------------------------|----------|-----------------|------------------|------------------|
| 10.5-year assessment     |                          |          |                 |                  |                  |
| Internalizing problems   | (+)                      | -        | -               | -                | -                |
| Depression scale         | (+)                      | 226      | 0.5 (-0.2, 1.2) | 0.2 (-1.0, 1.5)  | 0.1 (-1.1, 1.3)  |
| Anxiety scale            | (+)                      | 227      | 0.2 (-0.5, 1.0) | 0.3 (-0.9, 1.5)  | 0.2 (-0.9, 1.4)  |
| Externalizing problems   |                          |          |                 |                  |                  |
| Hyperactivity scale      | (+)                      | 235      | 0.1 (-0.6, 0.8) | 0.1 (-1.0, 1.3)  | -0.1 (-1.1, 1.0) |
| Attention problems scale | (+)                      | 227      | 0.1 (-0.6, 0.8) | -0.2 (-1.4, 0.9) | -0.2 (-1.3, 0.9) |
| 14-year assessment       |                          |          |                 |                  |                  |
| Internalizing problems   | (+)                      | -        | -               | -                | -                |
| Depression scale         | (+)                      | 235      | 0.3 (-0.4, 1.1) | 0.3 (-1.0, 1.6)  | 0.3 (-0.9, 1.5)  |
| Anxiety scale            | (+)                      | 235      | 0.5 (-0.2, 1.2) | -0.4 (-1.5, 0.8) | -0.4 (-1.5, 0.7) |
| Externalizing problems   |                          |          |                 |                  |                  |
| Hyperactivity scale      | (+)                      | -        | -               | -                | -                |
| Attention problems scale | (+)                      | -        | -               | -                | -                |
| 16-year assessment       |                          |          |                 |                  |                  |
| Internalizing problems   | (+)                      | 222      | 1.1 (0.2, 2.0)  | 0.2 (-0.9, 1.4)  | 0.2 (-0.8, 1.3)  |
| Depression scale         | (+)                      | 225      | 0.6 (-0.3, 1.5) | 0.2 (-0.9, 1.4)  | 0.2 (-0.8, 1.3)  |
| Anxiety scale            | (+)                      | 225      | 0.9 (-0.1, 1.9) | 0.5 (-0.8, 1.8)  | 0.3 (-0.9, 1.6)  |
| Externalizing problems   |                          |          |                 |                  |                  |
| Hyperactivity scale      | (+)                      | 285      | 0.9 (0.1, 1.6)  | 0.0 (-1.3, 1.2)  | -0.2 (-1.4, 1.0) |
| Attention problems scale | (+)                      | 225      | 1.3 (0.5, 2.1)  | -0.3 (-1.4, 0.8) | -0.4 (-1.4, 0.6) |

*Abbreviations:* BASC-2, Behavior Assessment System for Children, 2nd edition; *n*, number of observations; *k*, number of children;  $\Sigma$ LMW, sum of metabolites of low-molecular weight phthalates;  $\Sigma$ HMW, sum of metabolites of high-molecular weight phthalates;  $\Sigma$ DEHP, sum of di(2-ethylhexyl) phthalate metabolites.

Models were adjusted for maternal age at enrollment, education, country of birth, years in the U.S., depression at time of assessment; child sex, child age at time of assessment, language of assessment, HOME score, and household income at time of assessment.

<sup>a</sup> Separate models created for each sum of metabolites ( $\Sigma$ DEHP,  $\Sigma$ HMW,  $\Sigma$ LMW).

<sup>b</sup> (+) Higher scores indicate poorer performance/more symptomatic behavior; (-) Lower scores indicate poorer performance/more symptomatic behavior.

**Table S30.** Adjusted associations [ $\beta$  (95% CI)] of prenatal urinary phthalate biomarker concentrations (nmol/mL; log<sub>2</sub>-transformed and specific gravity-adjusted)<sup>a</sup> with executive function and cognition outcomes at 7, 9, 10.5, 12, 14, and/or 16 years including prenatal OP pesticide exposure using GEE models, CHAMACOS.

| Outcomes                           | Orientation <sup>b</sup> | <i>n</i> | <i>k</i> | $\Sigma$ LMW     | $\Sigma$ HMW     | $\Sigma$ DEHP    |
|------------------------------------|--------------------------|----------|----------|------------------|------------------|------------------|
| <i>Executive function</i>          |                          |          |          |                  |                  |                  |
| WCST                               |                          |          |          |                  |                  |                  |
| Errors (T-scores)                  | (-)                      | 593      | 317      | 0.2 (-0.4, 0.8)  | 0.5 (-0.4, 1.4)  | 0.5 (-0.4, 1.3)  |
| Preservative Errors (T-scores)     | (-)                      | 593      | 317      | 0.7 (-0.1, 1.4)  | 0.6 (-0.7, 1.8)  | 0.6 (-0.6, 1.7)  |
| BRIEF – maternal report (T-scores) |                          |          |          |                  |                  |                  |
| Behavioral Regulation Index        | (+)                      | 922      | 331      | 0.1 (-0.4, 0.6)  | 0.1 (-0.8, 1.0)  | 0.0 (-0.8, 0.8)  |
| Metacognition Index                | (+)                      | 921      | 330      | -0.5 (-0.9, 0.0) | -0.1 (-1.0, 0.9) | -0.1 (-1.0, 0.7) |
| Global Executive Composite         | (+)                      | 922      | 331      | -0.3 (-0.8, 0.2) | 0.0 (-0.9, 1.0)  | -0.1 (-0.9, 0.8) |
| NEPSY Tower                        | (-)                      | 313      | 313      | 0.1 (-0.1, 0.3)  | 0.1 (-0.2, 0.4)  | 0.1 (-0.2, 0.4)  |
| <i>Cognition</i>                   |                          |          |          |                  |                  |                  |
| WISC-IV (scaled scores)            |                          |          |          |                  |                  |                  |
| Full-Scale IQ                      | (-)                      | 589      | 321      | -0.2 (-1.0, 0.6) | 0.0 (-1.4, 1.4)  | 0.1 (-1.3, 1.4)  |
| Verbal comprehension IQ            | (-)                      | 621      | 324      | -0.4 (-1.1, 0.4) | -0.4 (-1.7, 1.0) | -0.3 (-1.5, 1.0) |
| Perceptual reasoning IQ            | (-)                      | 621      | 324      | 0.2 (-0.7, 1.2)  | 0.4 (-1.2, 1.9)  | 0.3 (-1.1, 1.7)  |
| Working memory IQ                  | (-)                      | 593      | 323      | -0.6 (-1.4, 0.1) | -0.2 (-1.6, 1.2) | -0.1 (-1.4, 1.3) |
| Processing speed IQ                | (-)                      | 593      | 323      | 0.2 (-0.4, 0.9)  | 0.5 (-0.7, 1.7)  | 0.5 (-0.6, 1.6)  |

*Abbreviations:* *n*, number of observations from all time points; *k*, number of children with data for at least one time point; WCST, Wisconsin Card Sort Task-64: Computer Version 2 – Research Edition; BRIEF, Behavior Rating Inventory Executive Function; WISC-IV, Wechsler Intelligence Scale for Children 4th edition;  $\Sigma$ LMW, sum of metabolites of low-molecular weight phthalates;  $\Sigma$ HMW, sum of metabolites of high-molecular weight phthalates;  $\Sigma$ DEHP, sum of di(2-ethylhexyl) phthalate metabolites. Models were adjusted for maternal age at enrollment, education, country of birth, years in the U.S., depression at time of assessment; child sex, child age at time of assessment, language of assessment, HOME score, household income at time of assessment, and prenatal pesticide exposure. WCST models were also adjusted for children’s video game usage.

<sup>a</sup> Separate models created for each sum of metabolites ( $\Sigma$ DEHP,  $\Sigma$ HMW,  $\Sigma$ LMW).

<sup>b</sup> (+) Higher scores indicate poorer performance/more symptomatic behavior; (-) Lower scores indicate poorer performance/more symptomatic behavior.

**Table S31.** Adjusted associations [ $\beta$  (95% CI)] of prenatal urinary phthalate biomarker concentrations (nmol/mL; log<sub>2</sub>-transformed and specific gravity-adjusted)<sup>a</sup> with behavior and social cognition outcomes at 7, 9, 10.5, 12, 14, and/or 16 years including prenatal OP pesticide exposures using GEE models, CHAMACOS.

| Outcomes                                       | Orientation <sup>b</sup> | <i>n</i> | <i>k</i> | $\Sigma$ LMW     | $\Sigma$ HMW     | $\Sigma$ DEHP    |
|------------------------------------------------|--------------------------|----------|----------|------------------|------------------|------------------|
| <i>Social Cognition</i> <sup>c</sup>           |                          |          |          |                  |                  |                  |
| SRS Total Score                                | (+)                      | 235      | 235      | 0.5 (-0.1, 1.1)  | -0.2 (-1.0, 0.6) | -0.2 (-1.0, 0.5) |
| ENI                                            | (-)                      | 313      | 313      | 0.0 (-0.1, 0.1)  | 0.1 (-0.1, 0.2)  | 0.1 (-0.1, 0.2)  |
| NEPSY-II Affect Recognition                    | (-)                      | 308      | 308      | 0.0 (-0.3, 0.2)  | -0.2 (-0.7, 0.1) | -0.2 (-0.6, 0.2) |
| <i>Behavior</i>                                |                          |          |          |                  |                  |                  |
| BASC-2 – maternal report (T-scores)            |                          |          |          |                  |                  |                  |
| Internalizing problems                         | (+)                      | 619      | 323      | 0.5 (-0.1, 1.1)  | 0.8 (-0.2, 1.8)  | 0.6 (-0.3, 1.5)  |
| Depression scale                               | (+)                      | 322      | 322      | 0.4 (-0.1, 1.0)  | 0.4 (-0.5, 1.3)  | 0.3 (-0.6, 1.1)  |
| Anxiety scale                                  | (+)                      | 313      | 313      | 0.3 (-0.3, 1.0)  | 0.8 (-0.4, 1.9)  | 0.6 (-0.5, 1.7)  |
| Externalizing problems                         | (+)                      | 612      | 323      | 0.0 (-0.5, 0.4)  | 0.3 (-0.5, 1.2)  | 0.2 (-0.6, 0.9)  |
| Hyperactivity                                  | (+)                      | 619      | 323      | -0.2 (-0.6, 0.2) | 0.0 (-0.7, 0.7)  | -0.1 (-0.8, 0.5) |
| Attention problems                             | (+)                      | 619      | 323      | -0.2 (-0.7, 0.3) | -0.3 (-1.3, 0.7) | -0.2 (-1.2, 0.7) |
| BASC-2 – teacher-report (T-score) <sup>c</sup> |                          |          |          |                  |                  |                  |
| Internalizing problems                         | (+)                      | 265      | 265      | -0.7 (-1.6, 0.2) | -0.4 (-1.8, 1.0) | -0.3 (-1.6, 1.0) |
| Depression scale                               | (+)                      | 265      | 265      | -0.6 (-1.3, 0.1) | -0.2 (-1.4, 0.9) | -0.2 (-1.4, 0.9) |
| Anxiety scale                                  | (+)                      | 265      | 265      | -0.8 (-1.8, 0.1) | -0.8 (-2.1, 0.5) | -0.7 (-2.0, 0.6) |
| Externalizing problems                         | (+)                      | 265      | 265      | -0.1 (-0.8, 0.6) | 0.0 (-1.0, 1.0)  | 0.2 (-0.8, 1.1)  |
| Hyperactivity scale                            | (+)                      | 265      | 265      | -0.0 (-0.7, 0.7) | -0.2 (-1.4, 0.9) | -0.1 (-1.1, 0.9) |
| Attention problems scale                       | (+)                      | 265      | 265      | -0.2 (-0.8, 0.3) | -0.5 (-1.4, 0.4) | -0.3 (-1.2, 0.6) |
| CADS – maternal report (T-scores)              |                          |          |          |                  |                  |                  |
| ADHD Index                                     | (+)                      | 921      | 331      | -0.4 (-0.7, 0.0) | -0.2 (-1.0, 0.5) | -0.3 (-1.0, 0.4) |
| DSM-IV Total Scale                             | (+)                      | 920      | 331      | -0.3 (-0.7, 0.1) | -0.1 (-0.9, 0.7) | -0.2 (-0.9, 0.5) |
| Inattentive Scale                              | (+)                      | 920      | 331      | -0.3 (-0.7, 0.1) | -0.3 (-1.0, 0.4) | -0.3 (-0.9, 0.4) |
| Hyperactive/impulsive scale                    | (+)                      | 920      | 331      | -0.2 (-0.7, 0.2) | 0.0 (-0.9, 0.9)  | -0.2 (-1.0, 0.6) |
| CADS – teacher-report (T-score) <sup>c</sup>   |                          |          |          |                  |                  |                  |
| ADHD Index                                     | (+)                      | 261      | 261      | -0.4 (-1.2, 0.4) | -0.5 (-1.9, 0.9) | -0.4 (-1.7, 1.0) |
| DSM-IV Total Scale                             | (+)                      | 260      | 260      | -0.2 (-0.9, 0.5) | -0.2 (-1.4, 1.0) | -0.1 (-1.2, 1.0) |
| Inattentive Scale                              | (+)                      | 264      | 264      | -0.2 (-0.8, 0.5) | -0.1 (-1.2, 0.9) | -0.1 (-1.0, 0.9) |
| Hyperactive/impulsive scale                    | (+)                      | 264      | 264      | -0.1 (-0.8, 0.6) | 0.1 (-1.1, 1.3)  | 0.2 (-0.9, 1.3)  |

|                       |     |     |     |                 |  |                  |                  |
|-----------------------|-----|-----|-----|-----------------|--|------------------|------------------|
| CPT-II (T-scores)     |     |     |     |                 |  |                  |                  |
| Errors of omission    | (+) | 595 | 316 | 0.9 (0.0, 1.8)  |  | 0.0 (-1.2, 1.1)  | -0.1 (-1.2, 1.0) |
| Errors of commission  | (+) | 595 | 316 | 0.3 (-0.2, 0.8) |  | -0.1 (-1.0, 0.8) | -0.3 (-1.1, 0.6) |
| ADHD confidence index | (+) | 596 | 316 | 0.7 (-0.5, 1.9) |  | -0.9 (-2.7, 0.8) | -1.0 (-2.6, 0.6) |

*Abbreviations* *n*, number of observations from all time points; *k*, number of children with data for at least one time point; SRS, Social Responsiveness Scale, Version 2; ENI, Evaluación Neuropsicológica del Niño; BASC-2, Behavior Assessment System for Children, 2nd edition; CADS, Conners' ADHD/DSM-IV Scales; ADHD, Attention Deficit Hyperactivity Disorder; DSM-IV, Diagnostic and Statistical Manual of Mental Disorders, 4th Edition; CPT-II, Continuous Performance Test, 2nd edition;  $\Sigma$ LMW, sum of metabolites of low-molecular weight phthalates;  $\Sigma$ HMW, sum of metabolites of high-molecular weight phthalates;  $\Sigma$ DEHP, sum of di(2-ethylhexyl) phthalate metabolites.

Models were adjusted for maternal age at enrollment, education, country of birth, years in the U.S., depression at time of assessment; child sex, child age at time of assessment, language of assessment, HOME score, household income at time of assessment, and prenatal pesticide exposure. CPT-II models were also adjusted for children's video game usage at time of assessment.

<sup>a</sup> Separate models created for each sum of metabolites ( $\Sigma$ DEHP,  $\Sigma$ HMW,  $\Sigma$ LMW).

<sup>b</sup> (+) Higher scores indicate poorer performance/more symptomatic behavior; (-) Lower scores indicate poorer performance/more symptomatic behavior.

<sup>c</sup> Outcomes measured at one time point and modeled using linear regression.

**Table S32.** Adjusted associations [ $\beta$  (95% CI)] of prenatal urinary phthalate biomarker concentrations (nmol/mL; log<sub>2</sub>-transformed and specific gravity-adjusted)<sup>a</sup> with self-reported BASC-2 behavior outcomes at 10.5, 14, and 16 years **including prenatal OP pesticide exposures** using linear regression models, CHAMACOS.

| Outcome                  | Orientation <sup>b</sup> | <i>n</i> | $\Sigma$ LMW    | $\Sigma$ HMW     | $\Sigma$ DEHP    |
|--------------------------|--------------------------|----------|-----------------|------------------|------------------|
| 10.5-year assessment     |                          |          |                 |                  |                  |
| Internalizing problems   | (+)                      | -        | -               | -                | -                |
| Depression scale         | (+)                      | 289      | 0.5 (-0.1, 1.1) | 0.7 (-0.4, 1.9)  | 0.6 (-0.5, 1.8)  |
| Anxiety scale            | (+)                      | 289      | 0.3 (-0.3, 1.0) | 0.5 (-0.5, 1.4)  | 0.4 (-0.5, 1.3)  |
| Externalizing problems   |                          |          |                 |                  |                  |
| Hyperactivity scale      | (+)                      | 299      | 0.2 (-0.4, 0.8) | 0.6 (-0.4, 1.6)  | 0.4 (-0.6, 1.4)  |
| Attention problems scale | (+)                      | 290      | 0.1 (-0.6, 0.8) | 0.1 (-1.0, 1.1)  | 0.1 (-0.9, 1.0)  |
| 14-year assessment       |                          |          |                 |                  |                  |
| Internalizing problems   | (+)                      | -        | -               | -                | -                |
| Depression scale         | (+)                      | 301      | 0.5 (-0.1, 1.2) | 0.6 (-0.6, 1.9)  | 0.5 (-0.6, 1.6)  |
| Anxiety scale            | (+)                      | 300      | 0.4 (-0.2, 1.1) | -0.3 (-1.3, 0.7) | -0.4 (-1.3, 0.6) |
| Externalizing problems   |                          |          |                 |                  |                  |
| Hyperactivity scale      | (+)                      | -        | -               | -                | -                |
| Attention problems scale | (+)                      | -        | -               | -                | -                |
| 16-year assessment       |                          |          |                 |                  |                  |
| Internalizing problems   | (+)                      | 283      | 1.2 (0.4, 1.9)  | 0.3 (-0.7, 1.4)  | 0.3 (-0.6, 1.3)  |
| Depression scale         | (+)                      | 286      | 0.7 (-0.1, 1.5) | 0.2 (-0.8, 1.3)  | 0.3 (-0.7, 1.2)  |
| Anxiety scale            | (+)                      | 286      | 0.9 (-0.0, 1.8) | 0.7 (-0.5, 1.8)  | 0.6 (-0.5, 1.7)  |
| Externalizing problems   |                          |          |                 |                  |                  |
| Hyperactivity scale      | (+)                      | 285      | 0.7 (0.1, 1.4)  | -0.1 (-1.1, 1.0) | -0.2 (-1.2, 0.8) |
| Attention problems scale | (+)                      | 286      | 1.5 (0.7, 2.2)  | -0.2 (-1.2, 0.7) | -0.3 (-1.2, 0.6) |

*Abbreviations:* BASC-2, Behavior Assessment System for Children, 2nd edition; *n*, number of observations; *k*, number of children;  $\Sigma$ LMW, sum of metabolites of low-molecular weight phthalates;  $\Sigma$ HMW, sum of metabolites of high-molecular weight phthalates;  $\Sigma$ DEHP, sum of di(2-ethylhexyl) phthalate metabolites.

Models were adjusted for maternal age at enrollment, education, country of birth, years in the U.S., depression at time of assessment; child sex, child age at time of assessment, language of assessment, HOME score, and household income at time of assessment.

<sup>a</sup> Separate models created for each sum of metabolites ( $\Sigma$ DEHP,  $\Sigma$ HMW,  $\Sigma$ LMW).

<sup>b</sup> (+) Higher scores indicate poorer performance/more symptomatic behavior; (-) Lower scores indicate poorer performance/more symptomatic behavior.

**Table S33.** Adjusted associations [ $\beta$  (95% CI)] of prenatal urinary phthalate biomarker concentrations (nmol/mL; log<sub>2</sub>-transformed and specific gravity-adjusted)<sup>a</sup> with executive function and cognition outcomes at 7, 9, 10.5, 12, 14, and/or 16 years **including prenatal OC pesticide exposure** using GEE models, CHAMACOS.

| Outcomes                           | Orientation <sup>b</sup> | <i>n</i> | <i>k</i> | $\Sigma$ LMW     | $\Sigma$ HMW     | $\Sigma$ DEHP    |
|------------------------------------|--------------------------|----------|----------|------------------|------------------|------------------|
| <i>Executive function</i>          |                          |          |          |                  |                  |                  |
| WCST                               |                          |          |          |                  |                  |                  |
| Errors (T-scores)                  | (-)                      | 466      | 250      | 0.3 (-0.4, 1.0)  | 0.6 (-0.5, 1.6)  | 0.5 (-0.5, 1.5)  |
| Preservative Errors (T-scores)     | (-)                      | 466      | 250      | 0.8 (-0.1, 1.6)  | 0.8 (-0.6, 2.2)  | 0.8 (-0.5, 2.1)  |
| BRIEF – maternal report (T-scores) |                          |          |          |                  |                  |                  |
| Behavioral Regulation Index        | (+)                      | 725      | 262      | 0.1 (-0.5, 0.7)  | 0.2 (-0.9, 1.3)  | 0.1 (-0.9, 1.2)  |
| Metacognition Index                | (+)                      | 724      | 261      | -0.3 (-0.9, 0.2) | 0.1 (-1.1, 1.2)  | 0.0 (-1.1, 1.0)  |
| Global Executive Composite         | (+)                      | 725      | 262      | -0.2 (-0.7, 0.4) | 0.1 (-1.0, 1.3)  | 0.1 (-1.0, 1.1)  |
| NEPSY Tower                        | (-)                      | 245      | 245      | 0.2 (-0.1, 0.4)  | 0.1 (-0.2, 0.5)  | 0.1 (-0.3, 0.5)  |
| <i>Cognition</i>                   |                          |          |          |                  |                  |                  |
| WISC-IV (scaled scores)            |                          |          |          |                  |                  |                  |
| Full-Scale IQ                      | (-)                      | 459      | 253      | -0.2 (-1.1, 0.7) | 0.1 (-1.6, 1.7)  | 0.1 (-1.5, 1.7)  |
| Verbal comprehension IQ            | (-)                      | 486      | 256      | -0.2 (-1.0, 0.7) | -0.4 (-2.1, 1.2) | -0.4 (-2.0, 1.2) |
| Perceptual reasoning IQ            | (-)                      | 486      | 256      | 0.0 (-1.1, 1.1)  | 0.6 (-1.2, 2.3)  | 0.5 (-1.1, 2.2)  |
| Working memory IQ                  | (-)                      | 462      | 255      | -0.6 (-1.4, 0.2) | -0.5 (-2.0, 1.1) | -0.3 (-1.8, 1.1) |
| Processing speed IQ                | (-)                      | 463      | 255      | 0.3 (-0.4, 1.0)  | 1.0 (-0.5, 2.4)  | 0.9 (-0.5, 2.3)  |

*Abbreviations:* *n*, number of observations from all time points; *k*, number of children with data for at least one time point; WCST, Wisconsin Card Sort Task-64: Computer Version 2 – Research Edition; BRIEF, Behavior Rating Inventory Executive Function; WISC-IV, Wechsler Intelligence Scale for Children 4th edition;  $\Sigma$ LMW, sum of metabolites of low-molecular weight phthalates;  $\Sigma$ HMW, sum of metabolites of high-molecular weight phthalates;  $\Sigma$ DEHP, sum of di(2-ethylhexyl) phthalate metabolites.

Models were adjusted for maternal age at enrollment, education, country of birth, years in the U.S., depression at time of assessment; child sex, child age at time of assessment, language of assessment, HOME score, household income at time of assessment, and prenatal pesticide exposure. WCST models were also adjusted for children’s video game usage.

<sup>a</sup> Separate models created for each sum of metabolites ( $\Sigma$ DEHP,  $\Sigma$ HMW,  $\Sigma$ LMW).

<sup>b</sup> (+) Higher scores indicate poorer performance/more symptomatic behavior; (-) Lower scores indicate poorer performance/more symptomatic behavior.



**Table S34.** Adjusted associations [ $\beta$  (95% CI)] of prenatal urinary phthalate biomarker concentrations (nmol/mL; log<sub>2</sub>-transformed and specific gravity-adjusted)<sup>a</sup> with behavior and social cognition outcomes at 7, 9, 10.5, 12, 14, and/or 16 years including prenatal OC pesticide exposures using GEE models, CHAMACOS.

| Outcomes                                       | Orientation <sup>b</sup> | <i>n</i> | <i>k</i> | $\Sigma$ LMW     | $\Sigma$ HMW     | $\Sigma$ DEHP    |
|------------------------------------------------|--------------------------|----------|----------|------------------|------------------|------------------|
| <i>Social Cognition</i> <sup>c</sup>           |                          |          |          |                  |                  |                  |
| SRS Total Score                                | (+)                      | 173      | 173      | 0.6 (0.0, 1.3)   | -0.1 (-1.1, 0.9) | -0.2 (-1.1, 0.7) |
| ENI                                            | (-)                      | 245      | 245      | 0.0 (-0.1, 0.1)  | 0.0 (-0.1, 0.1)  | 0.0 (-0.1, 0.1)  |
| NEPSY-II Affect Recognition                    | (-)                      | 242      | 242      | 0.0 (-0.3, 0.2)  | -0.3 (-0.8, 0.2) | -0.2 (-0.6, 0.3) |
| <i>Behavior</i>                                |                          |          |          |                  |                  |                  |
| BASC-2 – maternal report (T-scores)            |                          |          |          |                  |                  |                  |
| Internalizing problems                         | (+)                      | 484      | 255      | 0.5 (-0.1, 1.1)  | 0.8 (-0.3, 2.0)  | 0.7 (-0.4, 1.8)  |
| Depression scale                               | (+)                      | 253      | 253      | 0.4 (-0.2, 1.0)  | 0.6 (-0.4, 1.7)  | 0.5 (-0.4, 1.5)  |
| Anxiety scale                                  | (+)                      | 245      | 245      | 0.3 (-0.4, 1.1)  | 1.0 (-0.4, 2.4)  | 1.0 (-0.4, 2.3)  |
| Externalizing problems                         | (+)                      | 481      | 255      | -0.1 (-0.6, 0.4) | -0.1 (-0.9, 0.8) | -0.2 (-1.0, 0.6) |
| Hyperactivity                                  | (+)                      | 484      | 255      | -0.2 (-0.9, 0.4) | -0.6 (-1.8, 0.5) | -0.5 (-1.6, 0.5) |
| Attention problems                             | (+)                      | 484      | 255      | -0.2 (-0.7, 0.3) | -0.5 (-1.2, 0.3) | -0.6 (-1.2, 0.1) |
| BASC-2 – teacher-report (T-score) <sup>c</sup> |                          |          |          |                  |                  |                  |
| Internalizing problems                         | (+)                      | 207      | 207      | -0.7 (-1.7, 0.3) | -0.6 (-2.1, 0.9) | -0.5 (-1.9, 0.9) |
| Depression scale                               | (+)                      | 207      | 207      | -0.5 (-1.3, 0.3) | -0.8 (-1.9, 0.3) | -0.8 (-1.9, 0.2) |
| Anxiety scale                                  | (+)                      | 207      | 207      | -0.8 (-1.9, 0.2) | -0.7 (-2.2, 0.8) | -0.6 (-2.0, 0.8) |
| Externalizing problems                         | (+)                      | 207      | 207      | -0.1 (-0.8, 0.6) | -0.3 (-1.5, 0.8) | -0.3 (-1.3, 0.8) |
| Hyperactivity scale                            | (+)                      | 207      | 207      | 0.1 (-0.7, 0.8)  | -0.6 (-1.8, 0.7) | -0.5 (-1.7, 0.7) |
| Attention problems scale                       | (+)                      | 207      | 207      | -0.2 (-0.8, 0.5) | -0.4 (-1.4, 0.6) | -0.3 (-1.3, 0.7) |
| CADS – maternal report (T-scores)              |                          |          |          |                  |                  |                  |
| ADHD Index                                     | (+)                      | 724      | 262      | -0.3 (-0.7, 0.2) | -0.3 (-1.3, 0.6) | -0.3 (-1.2, 0.5) |
| DSM-IV Total Scale                             | (+)                      | 723      | 262      | -0.1 (-0.6, 0.3) | -0.1 (-1.1, 0.8) | -0.2 (-1.1, 0.7) |
| Inattentive Scale                              | (+)                      | 723      | 262      | -0.2 (-0.6, 0.2) | -0.2 (-1.0, 0.7) | -0.2 (-0.9, 0.6) |
| Hyperactive/impulsive scale                    | (+)                      | 723      | 262      | 0.0 (-0.5, 0.5)  | -0.1 (-1.1, 0.9) | -0.2 (-1.2, 0.7) |
| CADS – teacher-report (T-score) <sup>c</sup>   |                          |          |          |                  |                  |                  |
| ADHD Index                                     | (+)                      | 203      | 203      | -0.3 (-1.2, 0.6) | -0.5 (-2.0, 1.1) | -0.5 (-2.0, 0.9) |
| DSM-IV Total Scale                             | (+)                      | 202      | 202      | -0.1 (-0.9, 0.6) | -0.1 (-1.4, 1.2) | -0.1 (-1.4, 1.1) |
| Inattentive Scale                              | (+)                      | 206      | 206      | -0.1 (-0.8, 0.6) | 0.1 (-1.0, 1.2)  | 0.1 (-1.0, 1.1)  |
| Hyperactive/impulsive scale                    | (+)                      | 206      | 206      | -0.0 (-0.8, 0.8) | -0.1 (-1.5, 1.2) | -0.2 (-1.4, 1.1) |

|                       |     |     |     |                 |  |                  |                   |
|-----------------------|-----|-----|-----|-----------------|--|------------------|-------------------|
| CPT-II (T-scores)     |     |     |     |                 |  |                  |                   |
| Errors of omission    | (+) | 466 | 249 | 1.0 (0.0, 2.0)  |  | -0.5 (-1.7, 0.7) | -0.6 (-1.8, 0.5)  |
| Errors of commission  | (+) | 466 | 249 | 0.3 (-0.3, 1.0) |  | 0.7 (-0.2, 1.7)  | 0.5 (-0.4, 1.4)   |
| ADHD confidence index | (+) | 467 | 249 | 0.8 (-0.5, 2.1) |  | -1.7 (-3.5, 0.1) | -1.8 (-3.4, -0.1) |

*Abbreviations:* *n*, number of observations from all time points; *k*, number of children with data for at least one time point; SRS, Social Responsiveness Scale, Version 2; ENI, Evaluación Neuropsicológica del Niño; BASC-2, Behavior Assessment System for Children, 2nd edition; CADS, Conners' ADHD/DSM-IV Scales; ADHD, Attention Deficit Hyperactivity Disorder; DSM-IV, Diagnostic and Statistical Manual of Mental Disorders, 4th Edition; CPT-II, Continuous Performance Test, 2nd edition;  $\Sigma$ LMW, sum of metabolites of low-molecular weight phthalates;  $\Sigma$ HMW, sum of metabolites of high-molecular weight phthalates;  $\Sigma$ DEHP, sum of di(2-ethylhexyl) phthalate metabolites.

Models were adjusted for maternal age at enrollment, education, country of birth, years in the U.S., depression at time of assessment; child sex, child age at time of assessment, language of assessment, HOME score, household income at time of assessment, and prenatal pesticide exposure. CPT-II models were also adjusted for children's video game usage at time of assessment.

<sup>a</sup> Separate models created for each sum of metabolites ( $\Sigma$ DEHP,  $\Sigma$ HMW,  $\Sigma$ LMW).

<sup>b</sup> (+) Higher scores indicate poorer performance/more symptomatic behavior; (-) Lower scores indicate poorer performance/more symptomatic behavior.

<sup>c</sup> Outcomes measured at one time point and modeled using linear regression.

**Table S35.** Adjusted associations [ $\beta$  (95% CI)] of prenatal urinary phthalate biomarker concentrations (nmol/mL; log<sub>2</sub>-transformed and specific gravity-adjusted)<sup>a</sup> with self-reported BASC-2 behavior outcomes at 10.5, 14, and 16 years **including prenatal OC exposures** using linear regression models, CHAMACOS.

| Outcome                  | Orientation <sup>b</sup> | <i>n</i> | $\Sigma$ LMW    | $\Sigma$ HMW     | $\Sigma$ DEHP    |
|--------------------------|--------------------------|----------|-----------------|------------------|------------------|
| 10.5-year assessment     |                          |          |                 |                  |                  |
| Internalizing problems   | (+)                      | -        | -               | -                | -                |
| Depression scale         | (+)                      | 225      | 0.5 (-0.2, 1.2) | 0.3 (-0.9, 1.5)  | 0.2 (-1.0, 1.3)  |
| Anxiety scale            | (+)                      | 226      | 0.2 (-0.5, 1.0) | 0.3 (-0.8, 1.5)  | 0.3 (-0.9, 1.4)  |
| Externalizing problems   |                          |          |                 |                  |                  |
| Hyperactivity scale      | (+)                      | 234      | 0.1 (-0.6, 0.8) | 0.2 (-1.0, 1.3)  | -0.1 (-1.2, 1.1) |
| Attention problems scale | (+)                      | 226      | 0.1 (-0.6, 0.8) | -0.2 (-1.4, 1.0) | -0.2 (-1.4, 0.9) |
| 14-year assessment       |                          |          |                 |                  |                  |
| Internalizing problems   | (+)                      | -        | -               | -                | -                |
| Depression scale         | (+)                      | 234      | 0.3 (-0.4, 1.1) | 0.4 (-1.0, 1.7)  | 0.3 (-0.9, 1.5)  |
| Anxiety scale            | (+)                      | 234      | 0.5 (-0.2, 1.2) | -0.3 (-1.4, 0.9) | -0.3 (-1.4, 0.8) |
| Externalizing problems   |                          |          |                 |                  |                  |
| Hyperactivity scale      | (+)                      | -        | -               | -                | -                |
| Attention problems scale | (+)                      | -        | -               | -                | -                |
| 16-year assessment       |                          |          |                 |                  |                  |
| Internalizing problems   | (+)                      | 221      | 1.1 (0.2, 2.0)  | 0.3 (-0.8, 1.5)  | 0.3 (-0.8, 1.4)  |
| Depression scale         | (+)                      | 224      | 0.3 (-0.8, 1.4) | 0.3 (-0.8, 1.4)  | 0.3 (-0.8, 1.3)  |
| Anxiety scale            | (+)                      | 224      | 0.9 (-0.1, 1.9) | 0.6 (-0.7, 1.8)  | 0.5 (-0.7, 1.7)  |
| Externalizing problems   |                          |          |                 |                  |                  |
| Hyperactivity scale      | (+)                      | 223      | 0.8 (0.1, 1.6)  | 0.1 (-1.1, 1.4)  | -0.1 (-1.3, 1.1) |
| Attention problems scale | (+)                      | 224      | 1.3 (0.5, 2.1)  | -0.3 (-1.4, 0.8) | -0.4 (-1.5, 0.6) |

*Abbreviations:* BASC-2, Behavior Assessment System for Children, 2nd edition; *n*, number of observations; *k*, number of children;  $\Sigma$ LMW, sum of metabolites of low-molecular weight phthalates;  $\Sigma$ HMW, sum of metabolites of high-molecular weight phthalates;  $\Sigma$ DEHP, sum of di(2-ethylhexyl) phthalate metabolites.

Models were adjusted for maternal age at enrollment, education, country of birth, years in the U.S., depression at time of assessment; child sex, child age at time of assessment, language of assessment, HOME score, and household income at time of assessment.

<sup>a</sup> Separate models created for each sum of metabolites ( $\Sigma$ DEHP,  $\Sigma$ HMW,  $\Sigma$ LMW).

<sup>b</sup> (+) Higher scores indicate poorer performance/more symptomatic behavior; (-) Lower scores indicate poorer performance/more symptomatic behavior.

**Table S36.** Adjusted associations [ $\beta$  (95% CI)] of prenatal urinary phthalate biomarker concentrations (nmol/mL; log<sub>2</sub>-transformed and specific gravity-adjusted)<sup>a</sup> with executive function and cognition outcomes at 7, 9, 10.5, 12, 14, and/or 16 years including prenatal Mn exposure using GEE models, CHAMACOS.

| Outcomes                           | Orientation <sup>b</sup> | <i>n</i> | <i>k</i> | $\Sigma$ LMW     | $\Sigma$ HMW     | $\Sigma$ DEHP    |
|------------------------------------|--------------------------|----------|----------|------------------|------------------|------------------|
| <i>Executive function</i>          |                          |          |          |                  |                  |                  |
| WCST                               |                          |          |          |                  |                  |                  |
| Errors (T-scores)                  | (-)                      | 388      | 206      | 0.3 (-0.4, 1.1)  | 0.8 (-0.3, 1.8)  | 0.6 (-0.3, 1.6)  |
| Preservative Errors (T-scores)     | (-)                      | 388      | 206      | 0.6 (-0.4, 1.5)  | 0.6 (-0.9, 2.1)  | 0.5 (-0.8, 1.9)  |
| BRIEF – maternal report (T-scores) |                          |          |          |                  |                  |                  |
| Behavioral Regulation Index        | (+)                      | 604      | 215      | 0.3 (-0.4, 0.9)  | 0.2 (-0.9, 1.3)  | 0.1 (-0.9, 1.2)  |
| Metacognition Index                | (+)                      | 604      | 215      | -0.4 (-1.0, 0.3) | 0.1 (-1.1, 1.3)  | 0.1 (-1.0, 1.2)  |
| Global Executive Composite         | (+)                      | 604      | 215      | -0.1 (-0.8, 0.5) | 0.1 (-1.0, 1.3)  | 0.1 (-1.0, 1.2)  |
| NEPSY Tower                        | (-)                      | 206      | 206      | 0.2 (-0.1, 0.5)  | 0.2 (-0.2, 0.6)  | 0.1 (-0.3, 0.5)  |
| <i>Cognition</i>                   |                          |          |          |                  |                  |                  |
| WISC-IV (scaled scores)            |                          |          |          |                  |                  |                  |
| Full-Scale IQ                      | (-)                      | 384      | 209      | -0.2 (-1.2, 0.8) | -0.2 (-1.8, 1.3) | -0.3 (-1.8, 1.2) |
| Verbal comprehension IQ            | (-)                      | 407      | 212      | -0.3 (-1.2, 0.6) | -0.5 (-2.2, 1.2) | -0.5 (-2.1, 1.0) |
| Perceptual reasoning IQ            | (-)                      | 407      | 212      | 0.3 (-1.0, 1.6)  | 0.2 (-1.5, 1.9)  | 0.0 (-1.6, 1.6)  |
| Working memory IQ                  | (-)                      | 388      | 211      | -0.6 (-1.5, 0.4) | -0.7 (-2.1, 0.7) | -0.7 (-2.0, 0.6) |
| Processing speed IQ                | (-)                      | 388      | 211      | 0.4 (-0.5, 1.3)  | 0.6 (-0.8, 2.0)  | 0.7 (-0.6, 2.0)  |

*Abbreviations:* *n*, number of observations from all time points; *k*, number of children with data for at least one time point WCST, Wisconsin Card Sort Task-64: Computer Version 2 – Research Edition; BRIEF, Behavior Rating Inventory Executive Function; WISC-IV, Wechsler Intelligence Scale for Children 4th edition;  $\Sigma$ LMW, sum of metabolites of low-molecular weight phthalates;  $\Sigma$ HMW, sum of metabolites of high-molecular weight phthalates;  $\Sigma$ DEHP, sum of di(2-ethylhexyl) phthalate metabolites. Models were adjusted for maternal age at enrollment, education, country of birth, years in the U.S., depression at time of assessment; child sex, child age at time of assessment, language of assessment, HOME score, household income at time of assessment, and prenatal pesticide exposure. WCST models were also adjusted for children’s video game usage.

<sup>a</sup> Separate models created for each sum of metabolites ( $\Sigma$ DEHP,  $\Sigma$ HMW,  $\Sigma$ LMW).

<sup>b</sup> (+) Higher scores indicate poorer performance/more symptomatic behavior; (-) Lower scores indicate poorer performance/more symptomatic behavior.

**Table S37.** Adjusted associations [ $\beta$  (95% CI)] of prenatal urinary phthalate biomarker concentrations (nmol/mL; log<sub>2</sub>-transformed and specific gravity-adjusted)<sup>a</sup> with behavior and social cognition outcomes at 7, 9, 10.5, 12, 14, and/or 16 years including prenatal Mn exposures using GEE models, CHAMACOS.

| Outcomes                                       | Orientation <sup>b</sup> | <i>n</i> | <i>k</i> | ΣLMW             | ΣHMW              | ΣDEHP             |
|------------------------------------------------|--------------------------|----------|----------|------------------|-------------------|-------------------|
| <i>Social Cognition</i> <sup>c</sup>           |                          |          |          |                  |                   |                   |
| SRS Total Score                                | (+)                      | 153      | 153      | 0.4 (-0.3, 1.0)  | -0.4 (-1.4, 0.5)  | -0.4 (-1.2, 0.5)  |
| ENI                                            | (-)                      | 206      | 206      | 0.0 (-0.1, 0.1)  | 0.1 (0.0, 0.3)    | 0.1 (0.0, 0.3)    |
| NEPSY-II Affect Recognition                    | (-)                      | 203      | 203      | -0.1 (-0.3, 0.2) | -0.2 (-0.8, 0.3)  | -0.1 (-0.7, 0.4)  |
| <i>Behavior</i>                                |                          |          |          |                  |                   |                   |
| BASC-2 – maternal report (T-scores)            |                          |          |          |                  |                   |                   |
| Internalizing problems                         | (+)                      | 406      | 212      | 0.5 (-0.2, 1.2)  | 0.5 (-0.7, 1.7)   | 0.4 (-0.7, 1.5)   |
| Depression scale                               | (+)                      | 210      | 210      | 0.7 (-0.1, 1.4)  | 0.6 (-0.5, 1.6)   | 0.4 (-0.6, 1.4)   |
| Anxiety scale                                  | (+)                      | 204      | 204      | 0.3 (-0.6, 1.2)  | 0.5 (-1.0, 2.0)   | 0.4 (-1.1, 1.8)   |
| Externalizing problems                         | (+)                      | 401      | 212      | 0.1 (-0.4, 0.7)  | -0.1 (-1.0, 0.8)  | -0.2 (-1.0, 0.7)  |
| Hyperactivity                                  | (+)                      | 406      | 212      | 0.0 (-0.5, 0.5)  | -0.2 (-1.0, 0.5)  | -0.3 (-1.0, 0.4)  |
| Attention problems                             | (+)                      | 406      | 212      | -0.2 (-0.9, 0.5) | -0.2 (-1.4, 0.9)  | -0.2 (-1.2, 0.9)  |
| BASC-2 – teacher-report (T-score) <sup>c</sup> |                          |          |          |                  |                   |                   |
| Internalizing problems                         | (+)                      | 181      | 181      | -0.9 (-2.0, 0.3) | -0.9 (-2.4, 0.5)  | -0.8 (-2.2, 0.5)  |
| Depression scale                               | (+)                      | 181      | 181      | -0.7 (-1.6, 0.2) | -1.2 (-2.2, -0.1) | -1.1 (-2.1, -0.1) |
| Anxiety scale                                  | (+)                      | 181      | 181      | -1.0 (-2.2, 0.2) | -1.0 (-2.5, 0.5)  | -0.9 (-2.3, 0.5)  |
| Externalizing problems                         | (+)                      | 181      | 181      | 0.0 (-0.9, 0.9)  | -0.2 (-1.5, 1.1)  | -0.1 (-1.2, 1.0)  |
| Hyperactivity scale                            | (+)                      | 181      | 181      | 0.2 (-0.8, 1.2)  | -0.4 (-1.7, 1.0)  | -0.3 (-1.5, 0.9)  |
| Attention problems scale                       | (+)                      | 181      | 181      | -0.2 (-1.0, 0.5) | -0.6 (-1.8, 0.6)  | -0.4 (-1.5, 0.7)  |
| CADS – maternal report (T-scores)              |                          |          |          |                  |                   |                   |
| ADHD Index                                     | (+)                      | 602      | 215      | -0.3 (-0.8, 0.2) | -0.4 (-1.4, 0.7)  | -0.3 (-1.2, 0.6)  |
| DSM-IV Total Scale                             | (+)                      | 601      | 215      | -0.1 (-0.7, 0.4) | -0.3 (-1.4, 0.8)  | -0.3 (-1.2, 0.7)  |
| Inattentive Scale                              | (+)                      | 601      | 215      | -0.3 (-0.8, 0.2) | -0.4 (-1.3, 0.6)  | -0.3 (-1.2, 0.5)  |
| Hyperactive/impulsive scale                    | (+)                      | 601      | 215      | 0.0 (-0.5, 0.6)  | -0.2 (-1.3, 0.9)  | -0.2 (-1.2, 0.7)  |
| CADS – teacher-report (T-score) <sup>c</sup>   |                          |          |          |                  |                   |                   |
| ADHD Index                                     | (+)                      | 178      | 178      | -0.4 (-1.5, 0.8) | -1.0 (-2.6, 0.7)  | -0.8 (-2.3, 0.7)  |
| DSM-IV Total Scale                             | (+)                      | 171      | 171      | -0.1 (-1.1, 1.0) | -0.4 (-1.8, 1.0)  | -0.3 (-1.7, 1.0)  |
| Inattentive Scale                              | (+)                      | 181      | 181      | -0.2 (-1.1, 0.8) | -0.2 (-1.5, 1.1)  | -0.2 (-1.4, 1.0)  |
| Hyperactive/impulsive scale                    | (+)                      | 181      | 181      | 0.3 (-0.7, 1.3)  | -0.2 (-1.6, 1.1)  | -0.2 (-1.4, 1.1)  |

|                                                                                                                                                                                                                                                                                                                                                                                                                                                                                                                                                                                                                                                                                                                                                                                                                                                                                                                                                                                                                                                                                                                                                                                                                                                                                                                                                                                                                                                                                                                                                                                    |     |  |     |     |                 |  |                  |                  |
|------------------------------------------------------------------------------------------------------------------------------------------------------------------------------------------------------------------------------------------------------------------------------------------------------------------------------------------------------------------------------------------------------------------------------------------------------------------------------------------------------------------------------------------------------------------------------------------------------------------------------------------------------------------------------------------------------------------------------------------------------------------------------------------------------------------------------------------------------------------------------------------------------------------------------------------------------------------------------------------------------------------------------------------------------------------------------------------------------------------------------------------------------------------------------------------------------------------------------------------------------------------------------------------------------------------------------------------------------------------------------------------------------------------------------------------------------------------------------------------------------------------------------------------------------------------------------------|-----|--|-----|-----|-----------------|--|------------------|------------------|
| CPT-II (T-scores)                                                                                                                                                                                                                                                                                                                                                                                                                                                                                                                                                                                                                                                                                                                                                                                                                                                                                                                                                                                                                                                                                                                                                                                                                                                                                                                                                                                                                                                                                                                                                                  |     |  |     |     |                 |  |                  |                  |
| Errors of omission                                                                                                                                                                                                                                                                                                                                                                                                                                                                                                                                                                                                                                                                                                                                                                                                                                                                                                                                                                                                                                                                                                                                                                                                                                                                                                                                                                                                                                                                                                                                                                 | (+) |  | 390 | 206 | 0.7 (-0.3, 1.6) |  | -0.3 (-1.5, 1.0) | -0.3 (-1.5, 0.9) |
| Errors of commission                                                                                                                                                                                                                                                                                                                                                                                                                                                                                                                                                                                                                                                                                                                                                                                                                                                                                                                                                                                                                                                                                                                                                                                                                                                                                                                                                                                                                                                                                                                                                               | (+) |  | 390 | 206 | 0.3 (-0.4, 1.0) |  | 0.1 (-0.9, 1.2)  | 0.1 (-0.9, 1.0)  |
| ADHD confidence index                                                                                                                                                                                                                                                                                                                                                                                                                                                                                                                                                                                                                                                                                                                                                                                                                                                                                                                                                                                                                                                                                                                                                                                                                                                                                                                                                                                                                                                                                                                                                              | (+) |  | 390 | 206 | 0.9 (-0.6, 2.3) |  | -0.7 (-2.7, 1.3) | -0.7 (-2.6, 1.1) |
| <p><i>Abbreviations:</i> <i>n</i>, number of observations from all time points; <i>k</i>, number of children with data for at least one time point; SRS, Social Responsiveness Scale, Version 2; ENI, Evaluación Neuropsicológica del Niño; BASC-2, Behavior Assessment System for Children, 2nd edition; CADS, Conners' ADHD/DSM-IV Scales; ADHD, Attention Deficit Hyperactivity Disorder; DSM-IV, Diagnostic and Statistical Manual of Mental Disorders, 4th Edition; CPT-II, Continuous Performance Test, 2nd edition; <math>\Sigma</math>LMW, sum of metabolites of low-molecular weight phthalates; <math>\Sigma</math>HMW, sum of metabolites of high-molecular weight phthalates; <math>\Sigma</math>DEHP, sum of di(2-ethylhexyl) phthalate metabolites. Models were adjusted for maternal age at enrollment, education, country of birth, years in the U.S., depression at time of assessment; child sex, child age at time of assessment, language of assessment, HOME score, household income at time of assessment, and prenatal pesticide exposure. CPT-II models were also adjusted for children's video game usage at time of assessment.</p> <p><sup>a</sup> Separate models created for each sum of metabolites (<math>\Sigma</math>DEHP, <math>\Sigma</math>HMW, <math>\Sigma</math>LMW).</p> <p><sup>b</sup> (+) Higher scores indicate poorer performance/more symptomatic behavior; (-) Lower scores indicate poorer performance/more symptomatic behavior.</p> <p><sup>c</sup> Outcomes measured at one time point and modeled using linear regression.</p> |     |  |     |     |                 |  |                  |                  |

**Table S38.** Adjusted associations [ $\beta$  (95% CI)] of prenatal urinary phthalate biomarker concentrations (nmol/mL; log<sub>2</sub>-transformed and specific gravity-adjusted)<sup>a</sup> with self-reported BASC-2 behavior outcomes at 10.5, 14, and 16 years **including prenatal Mn exposures** using linear regression models, CHAMACOS.

| Outcome                  | Orientation <sup>b</sup> | <i>n</i> | $\Sigma$ LMW    | $\Sigma$ HMW     | $\Sigma$ DEHP    |
|--------------------------|--------------------------|----------|-----------------|------------------|------------------|
| 10.5-year assessment     |                          |          |                 |                  |                  |
| Internalizing problems   | (+)                      | -        | -               | -                | -                |
| Depression scale         | (+)                      | 188      | 1.0 (0.1, 1.8)  | 1.1 (-0.4, 2.6)  | 0.8 (-0.6, 2.3)  |
| Anxiety scale            | (+)                      | 193      | 0.5 (-0.3, 1.3) | 0.6 (-0.8, 2.0)  | 0.5 (-0.9, 1.8)  |
| Externalizing problems   |                          |          |                 |                  |                  |
| Hyperactivity scale      | (+)                      | 199      | 0.4 (-0.4, 1.2) | 0.4 (-0.9, 1.7)  | 0.1 (-1.2, 1.3)  |
| Attention problems scale | (+)                      | 194      | 0.4 (-0.4, 1.2) | -0.1 (-1.4, 1.2) | -0.3 (-1.5, 0.9) |
| 14-year assessment       |                          |          |                 |                  |                  |
| Internalizing problems   | (+)                      | -        | -               | -                | -                |
| Depression scale         | (+)                      | 197      | 0.6 (-0.1, 1.4) | 0.2 (-1.0, 1.3)  | 0.1 (-1.0, 1.1)  |
| Anxiety scale            | (+)                      | 196      | 0.7 (-0.2, 1.5) | -0.4 (-1.7, 0.8) | -0.5 (-1.7, 0.7) |
| Externalizing problems   |                          |          |                 |                  |                  |
| Hyperactivity scale      | (+)                      | -        | -               | -                | -                |
| Attention problems scale | (+)                      | -        | -               | -                | -                |
| 16-year assessment       |                          |          |                 |                  |                  |
| Internalizing problems   | (+)                      | 184      | 0.9 (-0.2, 2.0) | 0.4 (-0.9, 1.6)  | 0.4 (-0.7, 1.5)  |
| Depression scale         | (+)                      | 186      | 0.5 (-0.7, 1.6) | 0.4 (-1.0, 1.7)  | 0.4 (-0.8, 1.7)  |
| Anxiety scale            | (+)                      | 186      | 0.8 (-0.5, 2.1) | 1.3 (-0.1, 2.7)  | 1.2 (-0.1, 2.5)  |
| Externalizing problems   |                          |          |                 |                  |                  |
| Hyperactivity scale      | (+)                      | 185      | 0.6 (-0.2, 1.5) | -0.1 (-1.6, 1.2) | -0.4 (-1.7, 0.9) |
| Attention problems scale | (+)                      | 186      | 1.3 (0.3, 2.3)  | -0.2 (-1.4, 1.1) | -0.3 (-1.5, 0.8) |

*Abbreviations:* BASC-2, Behavior Assessment System for Children, 2nd edition; *n*, number of observations; *k*, number of children;  $\Sigma$ LMW, sum of metabolites of low-molecular weight phthalates;  $\Sigma$ HMW, sum of metabolites of high-molecular weight phthalates;  $\Sigma$ DEHP, sum of di(2-ethylhexyl) phthalate metabolites.

Models were adjusted for maternal age at enrollment, education, country of birth, years in the U.S., depression at time of assessment; child sex, child age at time of assessment, language of assessment, HOME score, and household income at time of assessment.

<sup>a</sup> Separate models created for each sum of metabolites ( $\Sigma$ DEHP,  $\Sigma$ HMW,  $\Sigma$ LMW).

<sup>b</sup> (+) Higher scores indicate poorer performance/more symptomatic behavior; (-) Lower scores indicate poorer performance/more symptomatic behavior.

**Figure S1.** Directed Acyclic Graph (DAG) for prenatal exposure to phthalates and neurodevelopment in the CHAMACOS cohort. Generated using dagitty.net

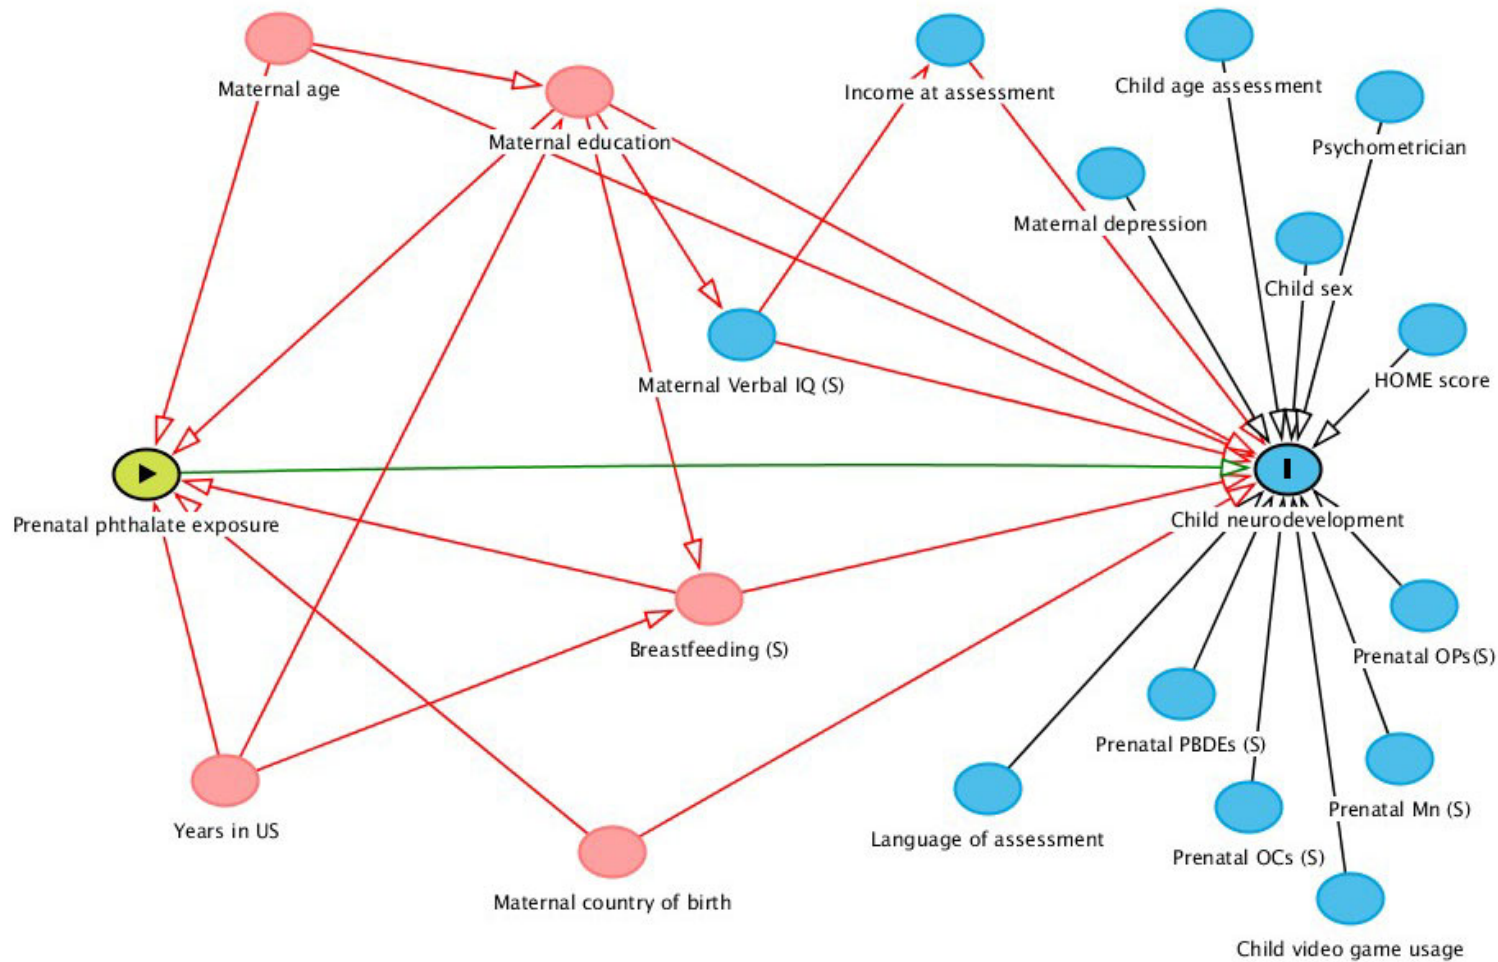

Supplement: ehp-127-107010-s001.pdf [file ehp-127-107010-s001.pdf]
