# Supplementary material
Source: PubMed Central journal article supplement (PMC6867166)
Supplement: ehp-127-107010-s002.pdf [file ehp-127-107010-s002.pdf]

**Note to readers with disabilities:** *EHP* strives to ensure that all journal content is accessible to all readers. However, some figures and Supplemental Material published in *EHP* articles may not conform to [508 standards](#) due to the complexity of the information being presented. If you need assistance accessing journal content, please contact [ehp508@niehs.nih.gov](mailto:ehp508@niehs.nih.gov). Our staff will work with you to assess and meet your accessibility needs within 3 working days.

### **Supplemental Material**

#### **Prenatal Exposure to Phthalates and Neurodevelopment in the CHAMACOS Cohort**

Carly Hyland, Ana M. Mora, Katherine Kogut, Antonia M. Calafat, Kim Harley, Julianna Deardorff, Nina Holland, Brenda Eskenazi, and Sharon K. Sagiv

#### **Table of Contents**

**Table S1.** Sociodemographic characteristics [ $n$  (%) or median (P25-P75)] of live-born singletons from the initial CHAMACOS mother-child cohort ( $n = 527$ ) and study participants with prenatal urinary phthalate metabolites who completed at least one of the neurobehavioral assessments at ages 7-16 years ( $n = 334$ ).

**Table S2.** Mean executive function, social cognition, behavior, and cognition T scores by age point, based on teacher report, maternal report, and child assessment.

**Table S3.** Distribution of phthalate biomarker concentrations (uncorrected) measured in maternal urine samples collected at two time points during pregnancy, CHAMACOS ( $n = 327$ ).

**Table S4.** Spearman correlation coefficients for prenatal urinary phthalate biomarker concentrations (specific gravity-adjusted and averaged during pregnancy), CHAMACOS ( $n = 327$ ).

**Table S5.** Adjusted associations [ $\beta$  (95% CI)] of prenatal urinary phthalate biomarker concentrations (specific gravity-adjusted) categorized in tertiles with **WCST executive function outcomes at 9, and/or 12 years** using GEE models for all children and stratified by child sex, CHAMACOS.

**Table S6.** Adjusted associations [ $\beta$  (95% CI)] of prenatal urinary phthalate biomarker concentrations (specific gravity-adjusted) categorized in tertiles with **BRIEF (parent-reported) and NEPSY Tower executive function outcomes at 7, 9, and/or 12 years** using GEE models for all children and stratified by child sex, CHAMACOS.

**Table S7.** Adjusted associations [ $\beta$  (95% CI)] of prenatal urinary phthalate biomarker concentrations (specific gravity-adjusted) categorized in tertiles with **WISC-IV cognitive outcomes at 7 and/or 10.5 years** using GEE models for all children and stratified by child sex, CHAMACOS.

**Table S8.** Adjusted associations [ $\beta$  (95% CI)] of prenatal urinary phthalate biomarker concentrations (specific gravity-adjusted) categorized in tertiles **with social cognition outcomes at 7, 9, and 14 years** using linear regression models for all children and stratified by child sex, CHAMACOS.

**Table S9.** Adjusted associations [ $\beta$  (95% CI)] of prenatal urinary phthalate biomarker concentrations (specific gravity-adjusted) categorized in tertiles with **CADS behavioral outcomes at 7, 9, and/or 12 years** using GEE models for all children and stratified by child sex, CHAMACOS.

**Table S10.** Adjusted associations [ $\beta$  (95% CI)] of prenatal urinary phthalate biomarker concentrations (specific gravity-adjusted) categorized in tertiles with **BASC behavioral outcomes at 7 and/or 10.5 years** using GEE models for all children and stratified by child sex, CHAMACOS.

**Table S11.** Adjusted associations [ $\beta$  (95% CI)] of prenatal urinary phthalate biomarker concentrations (specific gravity-adjusted) categorized in tertiles with **CPT-II behavioral outcomes at 9 and/or 12 years** using GEE models for all children and stratified by child sex, CHAMACOS.

**Table S12.** Adjusted associations [ $\beta$  (95% CI)] of prenatal urinary phthalate biomarker concentrations (nmol/mL;  $\log_2$ -transformed and specific gravity-adjusted) with executive function and cognition outcomes at 7, 9, 10.5, 12, 14, and/or 16 years using GEE models stratified by sex, CHAMACOS.

**Table S13.** Adjusted associations [ $\beta$  (95% CI)] of individual prenatal urinary phthalate biomarker concentrations (ng/mL;  $\log_2$ -transformed and specific gravity-adjusted) with executive function and cognition outcomes at 7, 9, 10.5, 12, 14, and/or 16 years using GEE models, CHAMACOS.

**Table S14.** Adjusted associations [ $\beta$  (95% CI)] of prenatal urinary phthalate biomarker concentrations (nmol/mL;  $\log_2$ -transformed and specific gravity-adjusted) with social cognition and behavior outcomes at 7, 9, 10.5, 12, 14, and/or 16 years using GEE models stratified by sex, CHAMACOS.

**Table S15.** Adjusted associations [ $\beta$  (95% CI)] of prenatal urinary phthalate biomarker concentrations (nmol/mL;  $\log_2$ -transformed and specific gravity-adjusted) with self-reported BASC-2 behavior outcomes at 10.5, 14, and 16 years using linear regression models stratified by sex, CHAMACOS.

**Table S16.** Adjusted associations [ $\beta$  (95% CI)] of individual prenatal urinary phthalate biomarker concentrations (ng/mL; log<sub>2</sub>-transformed and specific gravity-adjusted) with social cognition and behavior outcomes at 7, 9, 10.5, 12, 14, and/or 16 years using GEE models, CHAMACOS.

**Table S17.** Adjusted associations [ $\beta$  (95% CI)] of individual prenatal urinary phthalate biomarker concentrations (ng/mL; log<sub>2</sub>-transformed and specific gravity-adjusted) with self-reported BASC-2 behavior outcomes at 10.5, 14, and 16 years using linear regression models, CHAMACOS.

**Table S18.** Adjusted associations [ $\beta$  (95% CI)] of prenatal urinary phthalate biomarker concentrations (nmol/mL; log<sub>2</sub>-transformed and specific gravity-adjusted) with executive function and cognition outcomes at 7, 9, 10.5, 12, 14, and/or 16 years **excluding preterm birth and low birthweight** using GEE models, CHAMACOS.

**Table S19.** Adjusted associations [ $\beta$  (95% CI)] of prenatal urinary phthalate biomarker concentrations (nmol/mL; log<sub>2</sub>-transformed and specific gravity-adjusted) with behavior and social cognition outcomes at 7, 9, 10.5, 12, 14 and/or 16 years **excluding preterm birth and low birthweight** using GEE models, CHAMACOS.

**Table S20.** Adjusted associations [ $\beta$  (95% CI)] of prenatal urinary phthalate biomarker concentrations (nmol/mL; log<sub>2</sub>-transformed and specific gravity-adjusted) with self-reported BASC-2 behavior outcomes at 10.5, 14, and 16 years **excluding preterm birth and low birthweight** using linear regression models, CHAMACOS.

**Table S21.** Adjusted associations [ $\beta$  (95% CI)] of prenatal urinary phthalate biomarker concentrations (nmol/mL; log<sub>2</sub>-transformed and specific gravity-adjusted) with executive function and cognition outcomes at 7, 9, 10.5, 12, 14, and/or 16 years **including maternal PPVT score** using GEE models, CHAMACOS.

**Table S22.** Adjusted associations [ $\beta$  (95% CI)] of prenatal urinary phthalate biomarker concentrations (nmol/mL; log<sub>2</sub>-transformed and specific gravity-adjusted) with behavior and social cognition outcomes at 7, 9, 10.5, 12, 14, and/or 16 years **including maternal PPVT score** using GEE models, CHAMACOS.

**Table S23.** Adjusted associations [ $\beta$  (95% CI)] of prenatal urinary phthalate biomarker concentrations (nmol/mL; log<sub>2</sub>-transformed and specific gravity-adjusted) with self-reported BASC-2 behavior outcomes at 10.5, 14, and 16 years **including maternal PPVT score** using linear regression models, CHAMACOS.

**Table S24.** Adjusted associations [ $\beta$  (95% CI)] of prenatal urinary phthalate biomarker concentrations (nmol/mL; log<sub>2</sub>-transformed and specific gravity-adjusted) with executive function and cognition outcomes at 7, 9, 10.5, 12, 14, and/or 16 years **including breastfeeding** using GEE models, CHAMACOS.

**Table S25.** Adjusted associations [ $\beta$  (95% CI)] of prenatal urinary phthalate biomarker concentrations (nmol/mL; log<sub>2</sub>-transformed and specific gravity-adjusted) with behavior and social cognition outcomes at 7, 9, 10.5, 12, 14, and/or 16 years **including breastfeeding** using GEE models, CHAMACOS.

**Table S26.** Adjusted associations [ $\beta$  (95% CI)] of prenatal urinary phthalate biomarker concentrations (nmol/mL; log<sub>2</sub>-transformed and specific gravity-adjusted) with self-reported BASC-2 behavior outcomes at 10.5, 14, and 16 years **including breastfeeding** using linear regression models, CHAMACOS.

**Table S27.** Adjusted associations [ $\beta$  (95% CI)] of prenatal urinary phthalate biomarker concentrations (nmol/mL; log<sub>2</sub>-transformed and specific gravity-adjusted) with executive function and cognition outcomes at 7, 9, 10.5, 12, 14, and/or 16 years **including prenatal PBDE exposure** using GEE models, CHAMACOS.

**Table S28.** Adjusted associations [ $\beta$  (95% CI)] of prenatal urinary phthalate biomarker concentrations (nmol/mL; log<sub>2</sub>-transformed and specific gravity-adjusted) with behavior and social cognition outcomes at 7, 9, 10.5, 12, 14, and/or 16 years **including prenatal PBDE exposures** using GEE models, CHAMACOS.

**Table S29.** Adjusted associations [ $\beta$  (95% CI)] of prenatal urinary phthalate biomarker concentrations (nmol/mL; log<sub>2</sub>-transformed and specific gravity-adjusted) with self-reported BASC-2 behavior outcomes at 10.5, 14, and 16 years **including prenatal PBDE exposures** using linear regression models, CHAMACOS.

**Table S30.** Adjusted associations [ $\beta$  (95% CI)] of prenatal urinary phthalate biomarker concentrations (nmol/mL; log<sub>2</sub>-transformed and specific gravity-adjusted) with executive function and cognition outcomes at 7, 9, 10.5, 12, 14, and/or 16 years **including prenatal OP pesticide exposure** using GEE models, CHAMACOS.

**Table S31.** Adjusted associations [ $\beta$  (95% CI)] of prenatal urinary phthalate biomarker concentrations (nmol/mL; log<sub>2</sub>-transformed and specific gravity-adjusted) with behavior and social cognition outcomes at 7, 9, 10.5, 12, 14, and/or 16 years **including prenatal OP pesticide exposures** using GEE models, CHAMACOS.

**Table S32.** Adjusted associations [ $\beta$  (95% CI)] of prenatal urinary phthalate biomarker concentrations (nmol/mL; log<sub>2</sub>-transformed and specific gravity-adjusted) with self-reported BASC-2 behavior outcomes at 10.5, 14, and 16 years **including prenatal OP pesticide exposures** using linear regression models, CHAMACOS.

**Table S33.** Adjusted associations [ $\beta$  (95% CI)] of prenatal urinary phthalate biomarker concentrations (nmol/mL; log<sub>2</sub>-transformed and specific gravity-adjusted) with executive function and cognition outcomes at 7, 9, 10.5, 12, 14, and/or 16 years **including prenatal OC pesticide exposure** using GEE models, CHAMACOS.

**Table S34.** Adjusted associations [ $\beta$  (95% CI)] of prenatal urinary phthalate biomarker concentrations (nmol/mL; log<sub>2</sub>-transformed and specific gravity-adjusted) with behavior and social cognition outcomes at 7, 9, 10.5, 12, 14, and/or 16 years **including prenatal OC pesticide exposures** using GEE models, CHAMACOS.

**Table S35.** Adjusted associations [ $\beta$  (95% CI)] of prenatal urinary phthalate biomarker concentrations (nmol/mL; log<sub>2</sub>-transformed and specific gravity-adjusted) with self-reported BASC-2 behavior outcomes at 10.5, 14, and 16 years **including prenatal OC exposures** using linear regression models, CHAMACOS.

**Table S36.** Adjusted associations [ $\beta$  (95% CI)] of prenatal urinary phthalate biomarker concentrations (nmol/mL; log<sub>2</sub>-transformed and specific gravity-adjusted) with executive function and cognition outcomes at 7, 9, 10.5, 12, 14, and/or 16 years **including prenatal Mn exposure** using GEE models, CHAMACOS.

**Table S37.** Adjusted associations [ $\beta$  (95% CI)] of prenatal urinary phthalate biomarker concentrations (nmol/mL; log<sub>2</sub>-transformed and specific gravity-adjusted) with behavior and social cognition outcomes at 7, 9, 10.5, 12, 14, and/or 16 years **including prenatal Mn exposures** using GEE models, CHAMACOS.

**Table S38.** Adjusted associations [ $\beta$  (95% CI)] of prenatal urinary phthalate biomarker concentrations (nmol/mL; log<sub>2</sub>-transformed and specific gravity-adjusted) with self-reported BASC-2 behavior outcomes at 10.5, 14, and 16 years **including prenatal Mn exposures** using linear regression models, CHAMACOS.

**Figure S1.** Directed Acyclic Graph (DAG) for prenatal exposure to phthalates and neurodevelopment in the CHAMACOS cohort. Generated using daggity.net.
